# Supplementary material for: New Uncharged 2-Thienostilbene Oximes as Reactivators of Organophosphate-Inhibited Cholinesterases
Source: MDPI journal article supplement (doi:10.3390/ph14111147), 2021-11-11
Supplement: s1 [file s1]

Supplemental material

# New Uncharged 2-Thienostilbene Oximes as Reactivators of Organophosphate-Inhibited Cholinesterases

Milena Mlakić <sup>1,†</sup>, Tena Čadež <sup>2,†</sup>, Danijela Barić <sup>3</sup>, Ivana Puček <sup>1</sup>, Ana Ratković <sup>4</sup>, Željko Marinić <sup>5</sup>, Kornelija Lasić <sup>6</sup>, Zrinka Kovarik <sup>2,\*</sup> and Irena Škorić <sup>1,\*</sup>

<sup>1</sup> Department of Organic Chemistry, Faculty of Chemical Engineering and Technology, University of Zagreb, Marulićev Trg 19, HR-10 000 Zagreb, Croatia; mdragojev@fkit.hr (M.M.); ivana.pucek812@gmail.com (I.P.)

<sup>2</sup> Institute for Medical Research and Occupational Health, Ksaverska Cesta 2, HR-10 000 Zagreb, Croatia; tcadez@imi.hr

<sup>3</sup> Group for Computational Life Sciences, Division of Physical Chemistry, Ruđer Bošković Institute, Bijenička Cesta 54, HR-10 000 Zagreb, Croatia; dbaric@irb.hr

<sup>4</sup> Fidelita Ltd., Prilaz Baruna Filipovića 29, HR-10 000 Zagreb, Croatia; ana.ratkovic30@gmail.com

<sup>5</sup> NMR Center, Ruđer Bošković Institute, Bijenička Cesta 54, HR-10 000 Zagreb, Croatia; zmarinic@irb.hr

<sup>6</sup> Pliva Tapi R&D, TEVA, Prilaz Baruna Filipovića 25, HR-10 000 Zagreb, Croatia; Kornelija.Lasic@pliva.com

\* Correspondence: zkovarik@imi.hr (Z.K.); iskoric@fkit.hr (I.Š.)

† These authors contributed equally.

## Spectra contributions:

<sup>1</sup>H NMR spectra (600 MHz, CDCl<sub>3</sub>) of the mixture of isomers of 2-(4-methylstyryl)thiophene (*cis*-**1** and *trans*-**1**)

A part of the <sup>1</sup>H NMR spectra (600 MHz, CDCl<sub>3</sub>) of the mixture of isomers of 2-(4-methylstyryl)thiophene (*cis*-**1** and *trans*-**1**)

Mass spectra and HRMS analysis of the mixture of isomers of 2-(4-methylstyryl)thiophene (*cis*-**1** and *trans*-**1**)

<sup>1</sup>H NMR spectra (600 MHz, CDCl<sub>3</sub>) of the mixture of isomers of 2-(4-methoxystyryl)thiophene (*cis*-**2** and *trans*-**2**)

A part of the <sup>1</sup>H NMR spectra (600 MHz, CDCl<sub>3</sub>) of the mixture of isomers of 2-(4-methoxystyryl)thiophene (*cis*-**2** and *trans*-**2**)

Mass spectra and HRMS analysis of the mixture of isomers of 2-(4-methoxystyryl)thiophene (*cis*-**2** and *trans*-**2**)

<sup>1</sup>H NMR spectra (600 MHz, CDCl<sub>3</sub>) of the mixture of isomers of 2-(4-chlorostyryl)thiophene (*cis*-**3** and *trans*-**3**)

A part of the <sup>1</sup>H NMR spectra (600 MHz, CDCl<sub>3</sub>) of the mixture of isomers of 2-(4-chlorostyryl)thiophene (*cis*-**3** and *trans*-**3**)

Mass spectra and HRMS analysis of the mixture of isomers of 2-(4-chlorostyryl)thiophene (*cis*-**3** and *trans*-**3**)

<sup>1</sup>H NMR spectra (600 MHz, CDCl<sub>3</sub>) of the mixture of isomers of 2-(4-(2-(thiophen-2-yl)vinyl)benzonitrile (*cis*-**4** and *trans*-**4**)

A part of the <sup>1</sup>H NMR spectra (600 MHz, CDCl<sub>3</sub>) of the mixture of isomers of 2-(4-(2-(thiophen-2-yl)vinyl)benzonitrile (*cis*-**4** and *trans*-**4**)

Mass spectra and HRMS analysis of the mixture of isomers of 2-(4-(2-(thiophen-2-yl)vinyl)benzonitrile (*cis*-**4** and *trans*-**4**)

<sup>1</sup>H NMR spectra (600 MHz, CDCl<sub>3</sub>) of the mixture of isomers of 2-(4-nitrostyryl)thiophene (*cis*-**5** and *trans*-**5**)

A part of the <sup>1</sup>H NMR spectra (600 MHz, CDCl<sub>3</sub>) of the mixture of isomers of 2-(4-nitrostyryl)thiophene (*cis*-**5** and *trans*-**5**)

Mass spectra and HRMS analysis of the mixture of isomers of 2-(4-nitrostyryl)thiophene (*cis*-**5** and *trans*-**5**)

<sup>1</sup>H NMR spectra (600 MHz, CDCl<sub>3</sub>) of the mixture of isomers of *N,N*-dimethyl-4-(2-(thiophen-2-yl)vinyl)aniline (*cis*-**6** and *trans*-**6**)

A part of the <sup>1</sup>H NMR spectra (600 MHz, CDCl<sub>3</sub>) of the mixture of isomers of *N,N*-dimethyl-4-(2-(thiophen-2-yl)vinyl)aniline (*cis*-**6** and *trans*-**6**)

Mass spectra and HRMS analysis of the mixture of isomers of *N,N*-dimethyl-4-(2-(thiophen-2-yl)vinyl)aniline (*cis*-6 and *trans*-6)

<sup>1</sup>H NMR spectra (600 MHz, CDCl<sub>3</sub>) of the mixture of isomers of 5-(4-methylstyryl)thiophene-2-carbaldehyde (*cis*-7 and *trans*-7)

A part of the <sup>1</sup>H NMR spectra (600 MHz, CDCl<sub>3</sub>) of the mixture of isomers of 5-(4-methylstyryl)thiophene-2-carbaldehyde (*cis*-7 and *trans*-7)

Mass spectra and HRMS analysis of the mixture of isomers of 5-(4-methylstyryl)thiophene-2-carbaldehyde (*cis*-7 and *trans*-7)

<sup>1</sup>H NMR spectra (600 MHz, CDCl<sub>3</sub>) of the mixture of isomers of 5-(4-methoxystyryl)thiophene-2-carbaldehyde (*cis*-8 and *trans*-8)

A part of the <sup>1</sup>H NMR spectra (600 MHz, CDCl<sub>3</sub>) of the mixture of isomers of 5-(4-methoxystyryl)thiophene-2-carbaldehyde (*cis*-8 and *trans*-8)

Mass spectra and HRMS analysis of the mixture of isomers of 5-(4-methoxystyryl)thiophene-2-carbaldehyde (*cis*-8 and *trans*-8)

<sup>1</sup>H NMR spectra (600 MHz, CDCl<sub>3</sub>) of the mixture of isomers of 5-(4-chlorostyryl)thiophene-2-carbaldehyde (*cis*-9 and *trans*-9)

A part of the <sup>1</sup>H NMR spectra (600 MHz, CDCl<sub>3</sub>) of the mixture of isomers of 5-(4-chlorostyryl)thiophene-2-carbaldehyde (*cis*-9 and *trans*-9)

Mass spectra and HRMS analysis of the mixture of isomers of 5-(4-chlorostyryl)thiophene-2-carbaldehyde (*cis*-9 and *trans*-9)

<sup>1</sup>H NMR spectra (600 MHz, CDCl<sub>3</sub>) of the mixture of isomers of 4-(2-(5-formylthiophen-2-yl)vinyl)benzonitrile (*cis*-10 and *trans*-10)

A part of the <sup>1</sup>H NMR spectra (600 MHz, CDCl<sub>3</sub>) of the mixture of isomers of 4-(2-(5-formylthiophen-2-yl)vinyl)benzonitrile (*cis*-10 and *trans*-10)

Mass spectra and HRMS analysis of the mixture of isomers of 4-(2-(5-formylthiophen-2-yl)vinyl)benzonitrile (*cis*-10 and *trans*-10)

<sup>1</sup>H NMR spectra (600 MHz, CDCl<sub>3</sub>) of the mixture of isomers of 5-(4-nitrostyryl)thiophene-2-carbaldehyde (*cis*-11 and *trans*-11)

A part of the <sup>1</sup>H NMR spectra (600 MHz, CDCl<sub>3</sub>) of the mixture of isomers of 5-(4-nitrostyryl)thiophene-2-carbaldehyde (*cis*-11 and *trans*-11)

Mass spectra and HRMS analysis of the mixture of isomers of 5-(4-nitrostyryl)thiophene-2-carbaldehyde (*cis*-11 and *trans*-11)

<sup>1</sup>H NMR spectra (600 MHz, CDCl<sub>3</sub>) of the mixture of isomers of 5-(4-(dimethylamino)styryl)thiophene-2-carbaldehyde (*cis*-12 and *trans*-12)

A part of the <sup>1</sup>H NMR spectra (600 MHz, CDCl<sub>3</sub>) of the mixture of isomers of 5-(4-(dimethylamino)styryl)thiophene-2-carbaldehyde (*cis*-12 and *trans*-12)

Mass spectra and HRMS analysis of the mixture of isomers of 5-(4-(dimethylamino)styryl)thiophene-2-carbaldehyde (*cis*-12 and *trans*-12)

<sup>1</sup>H NMR spectra (600 MHz, CDCl<sub>3</sub>) of *trans,anti*-5-(4-methylstyryl)thiophene-2-carbaldehyde oxime (*trans,anti*-13)

A part of the <sup>1</sup>H NMR spectra (600 MHz, CDCl<sub>3</sub>) of *trans,anti*-5-(4-methylstyryl)thiophene-2-carbaldehyde oxime (*trans,anti*-13)

<sup>13</sup>C NMR spectrum (150 MHz, CDCl<sub>3</sub>) of *trans,anti*-5-(4-methylstyryl)thiophene-2-carbaldehyde oxime (*trans,anti*-13)

COSY spectrum of *trans,anti*-5-(4-methylstyryl)thiophene-2-carbaldehyde oxime (*trans,anti*-13)

HSQC spectrum of *trans,anti*-5-(4-methylstyryl)thiophene-2-carbaldehyde oxime (*trans,anti*-13)

<sup>1</sup>H NMR spectra (600 MHz, CDCl<sub>3</sub>) of *trans,syn*-5-(4-methylstyryl)thiophene-2-carbaldehyde oxime (*trans,syn*-13)

A part of the  $^1\text{H}$  NMR spectra (600 MHz,  $\text{CDCl}_3$ ) of *trans,syn*-5-(4-methylstyryl)thiophene-2-carbaldehyde oxime (*trans,syn*-13)

$^{13}\text{C}$  NMR spectrum (150 MHz,  $\text{CDCl}_3$ ) of *trans,syn*-5-(4-methylstyryl)thiophene-2-carbaldehyde oxime (*trans,syn*-13)

COSY spectrum of *trans,syn*-5-(4-methylstyryl)thiophene-2-carbaldehyde oxime (*trans,syn*-13)

HSQC spectrum of *trans,syn*-5-(4-methylstyryl)thiophene-2-carbaldehyde oxime (*trans,syn*-13)

$^1\text{H}$  NMR spectra (600 MHz,  $\text{CDCl}_3$ ) of *cis,syn*-5-(4-methylstyryl)thiophene-2-carbaldehyde oxime (*cis,syn*-13)

A part of the  $^1\text{H}$  NMR spectra (600 MHz,  $\text{CDCl}_3$ ) of *cis,syn*-5-(4-methylstyryl)thiophene-2-carbaldehyde oxime (*cis,syn*-13)

Mass spectra and HRMS analysis of the mixture of isomers of 5-(4-methylstyryl)thiophene-2-carbaldehyde oxime (13)

$^1\text{H}$  NMR spectra (600 MHz,  $\text{CDCl}_3 + \text{CD}_3\text{OD}$ ) of *trans,anti*-5-(4-methoxystyryl)thiophene-2-carbaldehyde oxime (*trans,anti*-14)

A part of the  $^1\text{H}$  NMR spectra (600 MHz,  $\text{CDCl}_3 + \text{CD}_3\text{OD}$ ) of *trans,anti*-5-(4-methoxystyryl)thiophene-2-carbaldehyde oxime (*trans,anti*-14)

$^{13}\text{C}$  NMR spectrum (150 MHz,  $\text{CDCl}_3 + \text{CD}_3\text{OD}$ ) of *trans,anti*-5-(4-methoxystyryl)thiophene-2-carbaldehyde oxime (*trans,anti*-14)

COSY spectrum of *trans,anti*-5-(4-methoxystyryl)thiophene-2-carbaldehyde oxime (*trans,anti*-14)

HSQC spectrum of *trans,anti*-5-(4-methoxystyryl)thiophene-2-carbaldehyde oxime (*trans,anti*-14)

$^1\text{H}$  NMR spectra (600 MHz,  $\text{CDCl}_3$ ) of *cis,syn*-5-(4-methoxystyryl)thiophene-2-carbaldehyde oxime (*cis,syn*-14)

A part of the  $^1\text{H}$  NMR spectra (600 MHz,  $\text{CDCl}_3$ ) of *cis,syn*-5-(4-methoxystyryl)thiophene-2-carbaldehyde oxime (*cis,syn*-14)

$^{13}\text{C}$  NMR spectrum (150 MHz,  $\text{CDCl}_3$ ) of *cis,syn*-5-(4-methoxystyryl)thiophene-2-carbaldehyde oxime (*cis,syn*-14)

COSY spectrum of *cis,syn*-5-(4-methoxystyryl)thiophene-2-carbaldehyde oxime (*cis,syn*-14)

HSQC spectrum of *cis,syn*-5-(4-methoxystyryl)thiophene-2-carbaldehyde oxime (*cis,syn*-14)

$^1\text{H}$  NMR spectra (600 MHz,  $\text{CDCl}_3$ ) of *trans,syn*-5-(4-methoxystyryl)thiophene-2-carbaldehyde oxime (*trans,syn*-14)

A part of the  $^1\text{H}$  NMR spectra (600 MHz,  $\text{CDCl}_3$ ) of *trans,syn*-5-(4-methoxystyryl)thiophene-2-carbaldehyde oxime (*trans,syn*-14)

$^{13}\text{C}$  NMR spectrum (150 MHz,  $\text{CDCl}_3$ ) of *trans,syn*-5-(4-methoxystyryl)thiophene-2-carbaldehyde oxime (*trans,syn*-14)

COSY spectrum of *trans,syn*-5-(4-methoxystyryl)thiophene-2-carbaldehyde oxime (*trans,syn*-14)

HSQC spectrum of *trans,syn*-5-(4-methoxystyryl)thiophene-2-carbaldehyde oxime (*trans,syn*-14)

Mass spectra and HRMS analysis of the mixture of isomers of 5-(4-methoxystyryl)thiophene-2-carbaldehyde oxime (14)

$^1\text{H}$  NMR spectra (600 MHz,  $\text{CDCl}_3$ ) of *trans,syn*-5-(4-chlorostyryl)thiophene-2-carbaldehyde oxime (*trans,syn*-15)

A part of the  $^1\text{H}$  NMR spectra (600 MHz,  $\text{CDCl}_3$ ) of *trans,syn*-5-(4-chlorostyryl)thiophene-2-carbaldehyde oxime (*trans,syn*-15)

$^{13}\text{C}$  NMR spectrum (150 MHz,  $\text{CDCl}_3$ ) of *trans,syn*-5-(4-chlorostyryl)thiophene-2-carbaldehyde oxime (*trans,syn*-15)

COSY spectrum of *trans,syn*-5-(4-chlorostyryl)thiophene-2-carbaldehyde oxime (*trans,syn*-15)

HSQC spectrum of *trans,syn*-5-(4-chlorostyryl)thiophene-2-carbaldehyde oxime (*trans,syn*-15)

$^1\text{H}$  NMR spectra (600 MHz,  $\text{CDCl}_3$ ) of *trans,anti*-5-(4-chlorostyryl)thiophene-2-carbaldehyde oxime (*trans,anti*-15)

<sup>13</sup>C NMR spectrum (150 MHz, CDCl<sub>3</sub>) of *trans,anti*-5-(4-chlorostyryl)thiophene-2-carbaldehyde oxime (*trans,anti*-**15**)

Mass spectra and HRMS analysis of the mixture of isomers of 5-(4-chlorostyryl)thiophene-2-carbaldehyde oxime (**15**)

<sup>1</sup>H NMR spectra (600 MHz, CDCl<sub>3</sub>) of *cis,syn*-4-(2-(5-((hydroxyimino)methyl)thiophen-2-yl)vinyl)benzonitrile (*cis,syn*-**16**) in the mixture with *trans,syn*-**16**

A part of the <sup>1</sup>H NMR spectra (600 MHz, CDCl<sub>3</sub>) of *cis,syn*-4-(2-(5-((hydroxyimino)methyl)thiophen-2-yl)vinyl)benzonitrile (*cis,syn*-**16**) in the mixture with *trans,syn*-**16**

<sup>1</sup>H NMR spectrum (600 MHz, CDCl<sub>3</sub>) of *trans,syn*-4-(2-(5-((hydroxyimino)methyl)thiophen-2-yl)vinyl)benzonitrile (*trans,syn*-**16**)

A part of the <sup>1</sup>H NMR spectrum (600 MHz, CDCl<sub>3</sub>) of *trans,syn*-4-(2-(5-((hydroxyimino)methyl)thiophen-2-yl)vinyl)benzonitrile (*trans,syn*-**16**)

<sup>13</sup>C NMR spectrum (150 MHz, CDCl<sub>3</sub>) of *trans,syn*-4-(2-(5-((hydroxyimino)methyl)thiophen-2-yl)vinyl)benzonitrile (*trans,syn*-**16**)

<sup>1</sup>H NMR spectrum (600 MHz, CDCl<sub>3</sub>) of *cis,anti*-4-(2-(5-((hydroxyimino)methyl)thiophen-2-yl)vinyl)benzonitrile (*cis,anti*-**16**) with traces of other isomers

A part of the <sup>1</sup>H NMR spectrum (600 MHz, CDCl<sub>3</sub>) of *cis,anti*-4-(2-(5-((hydroxyimino)methyl)thiophen-2-yl)vinyl)benzonitrile (*cis,anti*-**16**) with traces of other isomers

<sup>1</sup>H NMR spectrum (600 MHz, CDCl<sub>3</sub> + CD<sub>3</sub>OD) of *trans,anti*-4-(2-(5-((hydroxyimino)methyl)thiophen-2-yl)vinyl)benzonitrile (*trans,anti*-**16**)

A part of the <sup>1</sup>H NMR spectrum (600 MHz, CDCl<sub>3</sub> + CD<sub>3</sub>OD) of *trans,anti*-4-(2-(5-((hydroxyimino)methyl)thiophen-2-yl)vinyl)benzonitrile (*trans,anti*-**16**)

<sup>13</sup>C NMR spectrum (150 MHz, CDCl<sub>3</sub> + CD<sub>3</sub>OD) of *trans,anti*-4-(2-(5-((hydroxyimino)methyl)thiophen-2-yl)vinyl)benzonitrile (*trans,anti*-**16**)

COSY spectrum of *trans,anti*-4-(2-(5-((hydroxyimino)methyl)thiophen-2-yl)vinyl)benzonitrile (*trans,anti*-**16**)

HSQC spectrum of *trans,anti*-4-(2-(5-((hydroxyimino)methyl)thiophen-2-yl)vinyl)benzonitrile (*trans,anti*-**16**)

Mass spectra and HRMS analysis of the mixture of isomers of 4-(2-(5-((hydroxyimino)methyl)thiophen-2-yl)vinyl)benzonitrile (**16**)

<sup>1</sup>H NMR spectrum (600 MHz, CDCl<sub>3</sub>) of *trans,syn*-5-(4-nitrostyryl)thiophene-2-carbaldehyde oxime (*trans,syn*-**17**)

A part of the <sup>1</sup>H NMR spectrum (600 MHz, CDCl<sub>3</sub>) of *trans,syn*-5-(4-nitrostyryl)thiophene-2-carbaldehyde oxime (*trans,syn*-**17**)

<sup>13</sup>C NMR spectrum (150 MHz, CDCl<sub>3</sub>) of *trans,syn*-5-(4-nitrostyryl)thiophene-2-carbaldehyde oxime (*trans,syn*-**17**)

COSY spectrum of *trans,syn*-5-(4-nitrostyryl)thiophene-2-carbaldehyde oxime (*trans,syn*-**17**)

<sup>1</sup>H NMR spectrum (600 MHz, CDCl<sub>3</sub>) of *trans,anti*-5-(4-nitrostyryl)thiophene-2-carbaldehyde oxime (*trans,anti*-**17**) with traces of *cis,anti*-**17**

A part of the <sup>1</sup>H NMR spectrum (600 MHz, CDCl<sub>3</sub>) of *trans,anti*-5-(4-nitrostyryl)thiophene-2-carbaldehyde oxime (*trans,anti*-**17**) with traces of *cis,anti*-**17**

Mass spectra and HRMS analysis of the mixture of isomers of 5-(4-nitrostyryl)thiophene-2-carbaldehyde oxime (**17**)

<sup>1</sup>H NMR spectrum (600 MHz, CDCl<sub>3</sub>) of *cis,syn*-5-(4-dimethylaminostyryl)thiophene-2-carbaldehyde oxime (*cis,syn*-**18**)

A part of the <sup>1</sup>H NMR spectra (600 MHz, CDCl<sub>3</sub>) of *cis,syn*-5-(4-dimethylaminostyryl)thiophene-2-carbaldehyde oxime (*cis,syn*-**18**)

<sup>13</sup>C NMR spectrum (150 MHz, CDCl<sub>3</sub>) of *cis,syn*-5-(4-dimethylaminostyryl)thiophene-2-carbaldehyde oxime (*cis,syn*-**18**)

COSY spectrum of *cis,syn*-5-(4-dimethylaminostyryl)thiophene-2-carbaldehyde oxime (*cis,syn*-**18**)

HSQC spectrum of *cis,syn*-5-(4-dimethylaminostyryl)thiophene-2-carbaldehyde oxime (*cis,syn*-**18**)

<sup>1</sup>H NMR spectrum (600 MHz, CDCl<sub>3</sub>) of *trans,syn*-5-(4-dimethylaminostyryl)thiophene-2-carbaldehyde oxime (*trans,syn*-**18**) with traces of *cis,syn*-**18**

A part of the <sup>1</sup>H NMR spectrum (600 MHz, CDCl<sub>3</sub>) of *trans,syn*-5-(4-dimethylaminostyryl)thiophene-2-carbaldehyde oxime (*trans,syn*-**18**) with traces of *cis,syn*-**18**

Mass spectra and HRMS analysis of the mixture of isomers of 5-(4-dimethylaminostyryl)thiophene-2-carbaldehyde oxime (**18**)

**Figure S1:** Superposition of the cyclosarin-bound AChE (3ZLU) and BChE (3DJY) with cyclosarin in the same conformation at the active serine

**Figure S2:** Superposition of cyclosarin-bound AChE (3ZLU) and BChE (3DJY) with cyclosarin bound at the active serine obtained by replacing the dimethylamino and ethoxy groups of tabun with methyl and cyclohexyloxy groups of cyclosarin, respectively

**Figure S3:** Energy profile for the incremental decrease of the distance between the oxygen of oxime and phosphorus

**Table S1:** Data obtained by scanning of PES, presented in Figure S3.

**<sup>1</sup>H NMR spectrum (600 MHz, CDCl<sub>3</sub>) of the mixture of geometrical isomers of 2-(4-methylstyryl)thiophene (*cis*-1 and *trans*-1)**

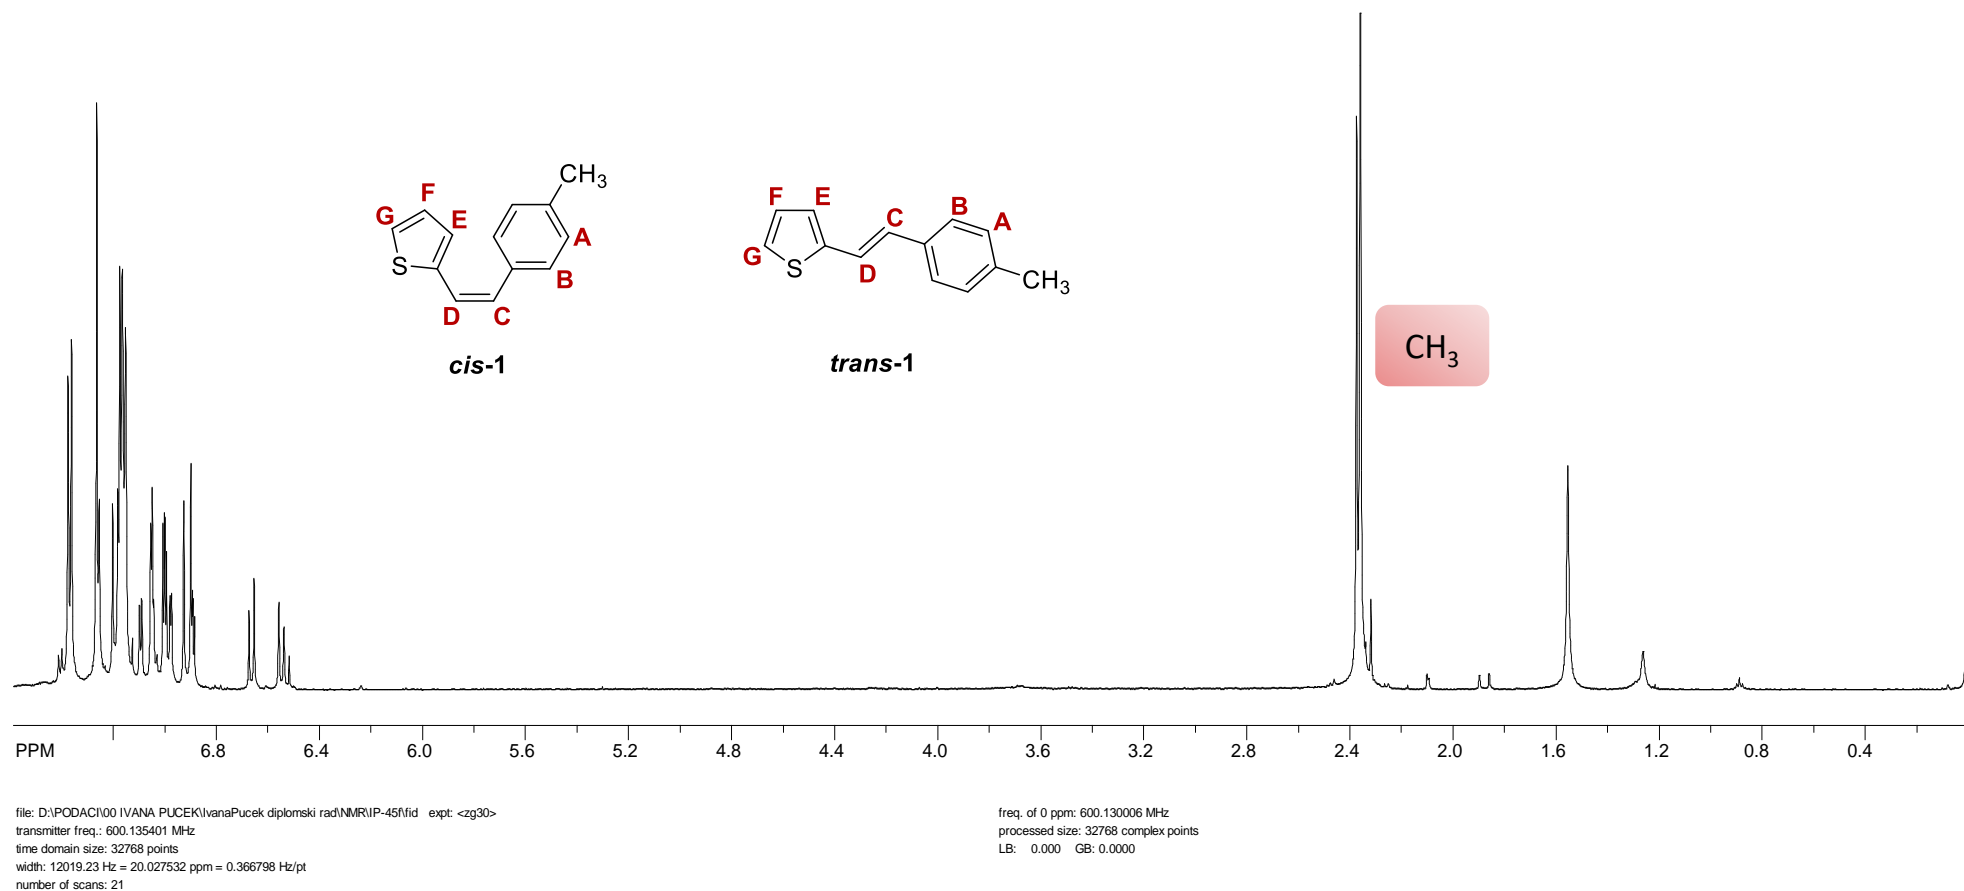

**A part of the  $^1\text{H}$  NMR spectrum (600 MHz,  $\text{CDCl}_3$ ) of the mixture of geometrical isomers of 2-(4-methylstyryl)thiophene (*cis*-1 and *trans*-1)**

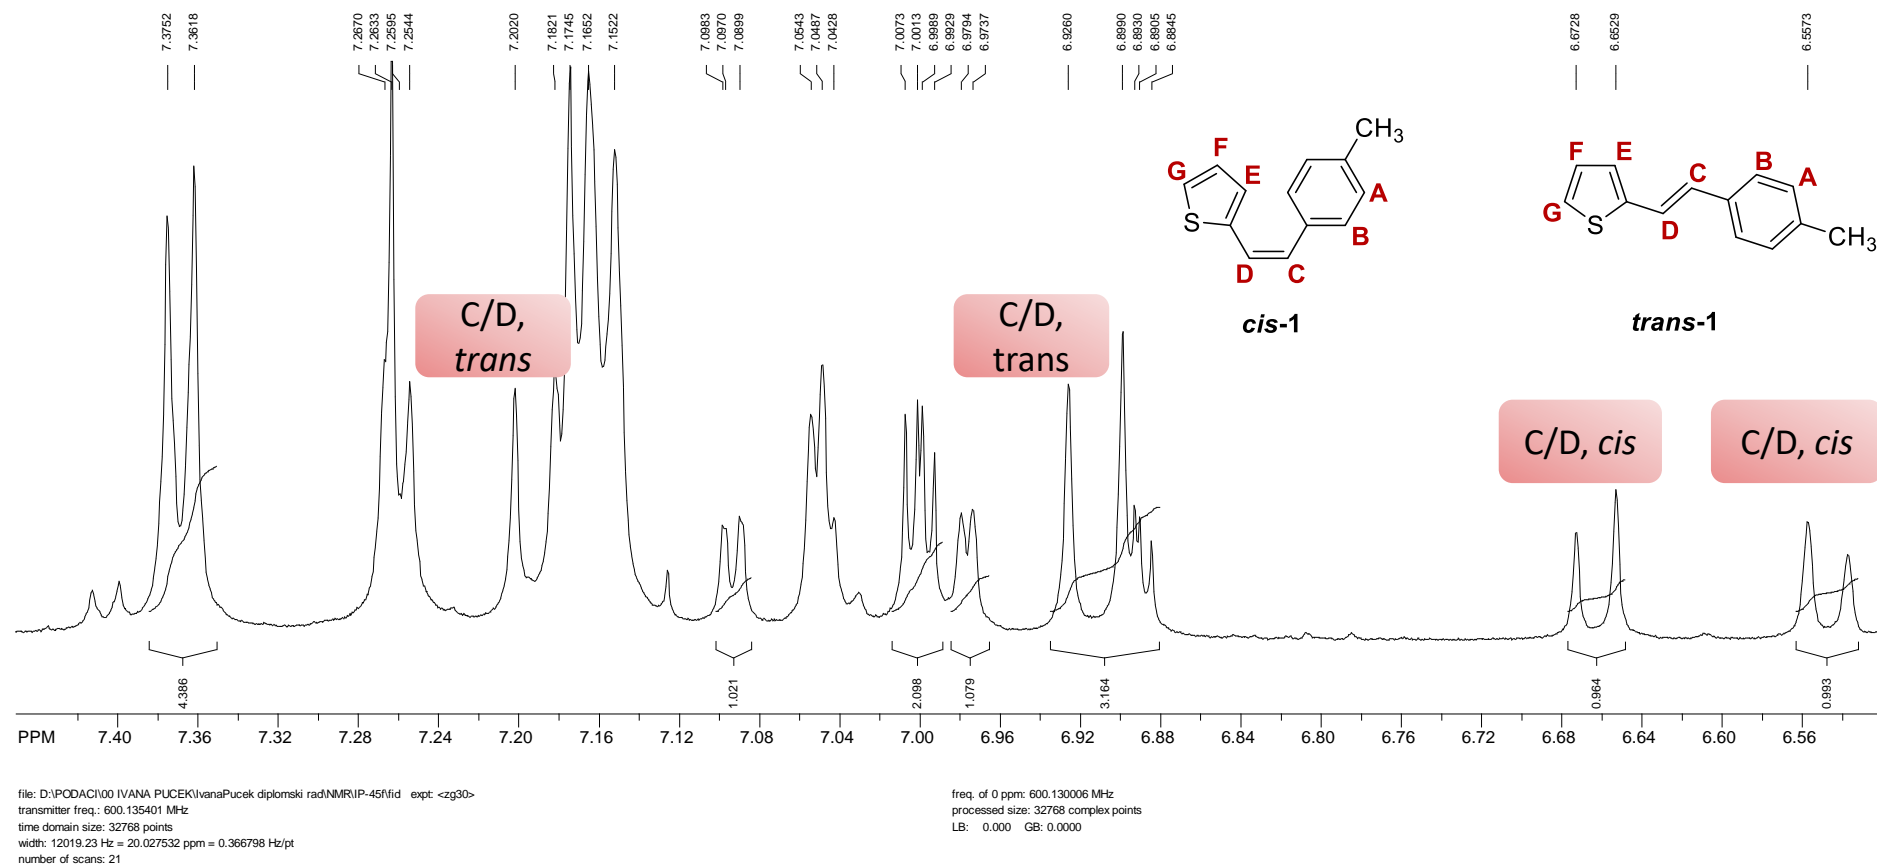

## Mass spectra and HRMS analysis of the mixture of geometrical isomers of 2-(4-methylstyryl)thiophene (*cis*-1 and *trans*-1)

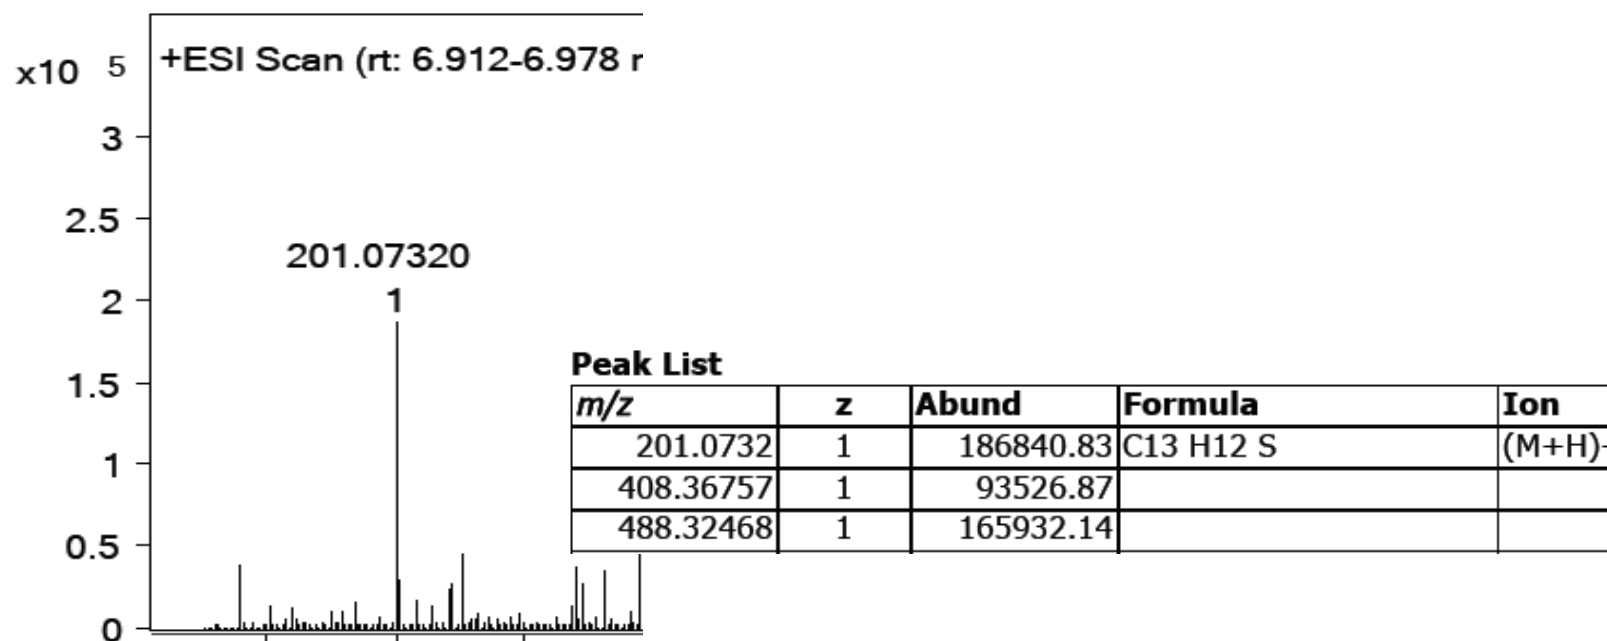

### Formula Calculator Results

| Formula   | Best | Mass      | Tgt Mass  | Diff (ppm) | Ion Species | Score |
|-----------|------|-----------|-----------|------------|-------------|-------|
| C13 H12 S | True | 200.06596 | 200.06597 | 0.06       | C13 H13 S   | 99.68 |



**$^1\text{H}$  NMR spectrum (600 MHz,  $\text{CDCl}_3$ ) of the mixture of geometrical isomers of 2-(4-methoxystyryl)thiophene (*cis*-2 and *trans*-2)**

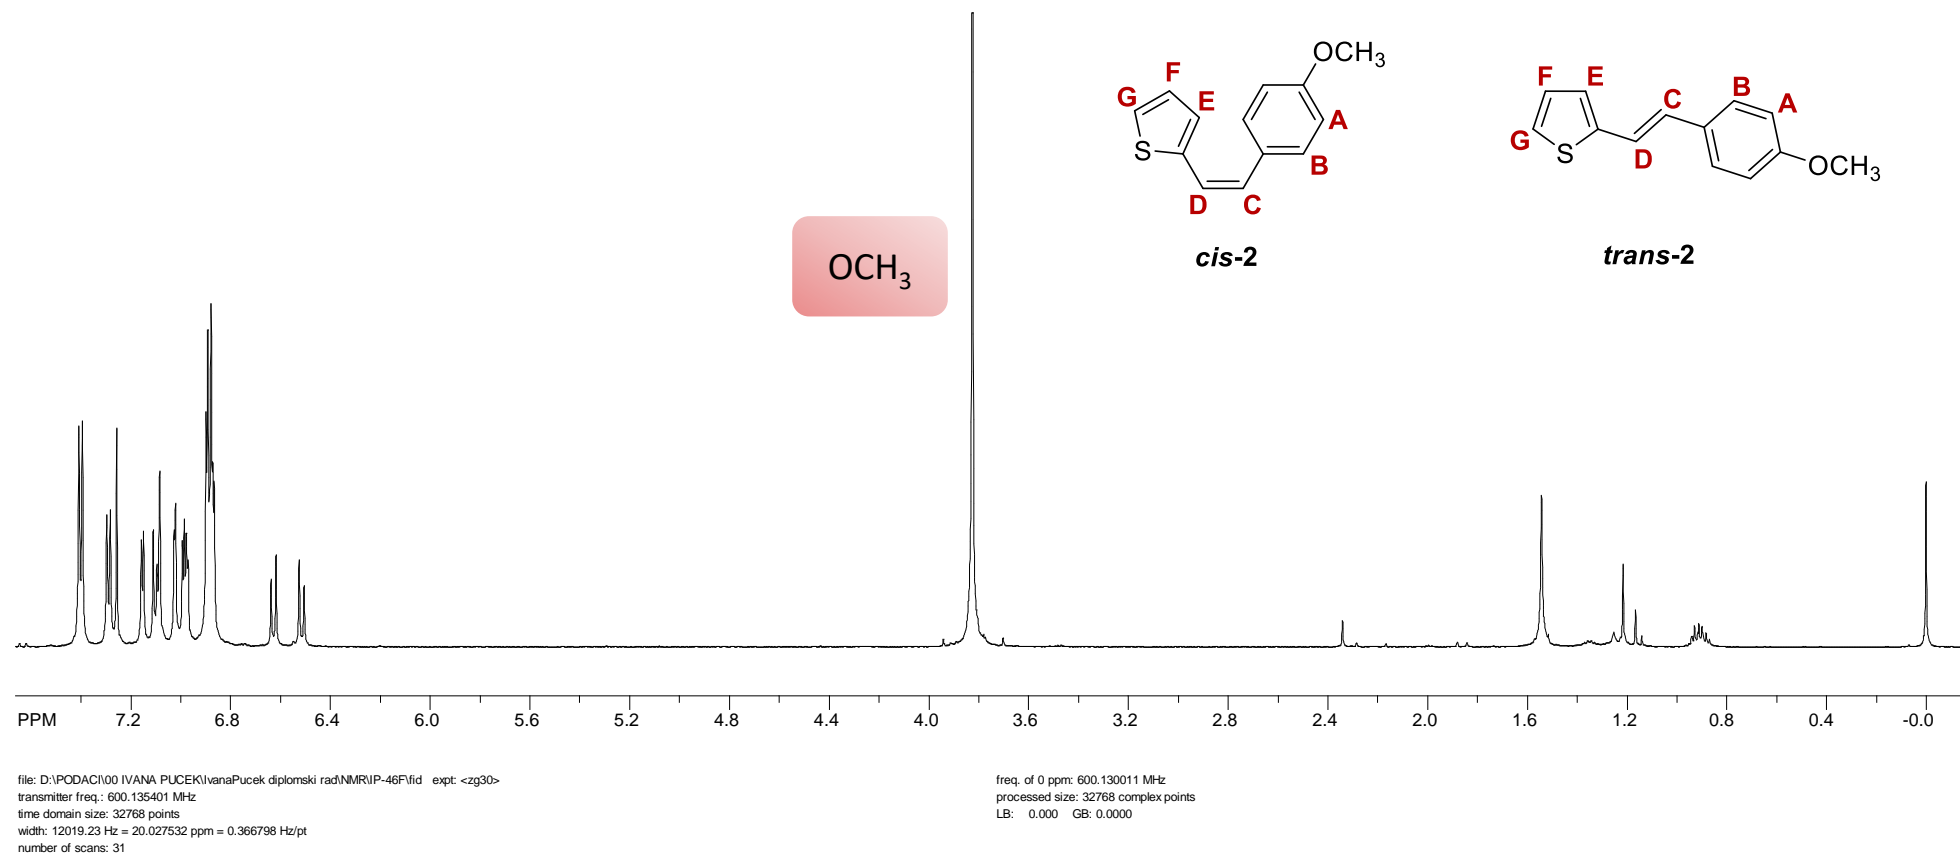

A part of the  $^1\text{H}$  NMR spectrum (600 MHz,  $\text{CDCl}_3$ ) of the mixture of geometrical isomers of 2-(4-methoxystyryl)thiophene (*cis*-2 and *trans*-2)

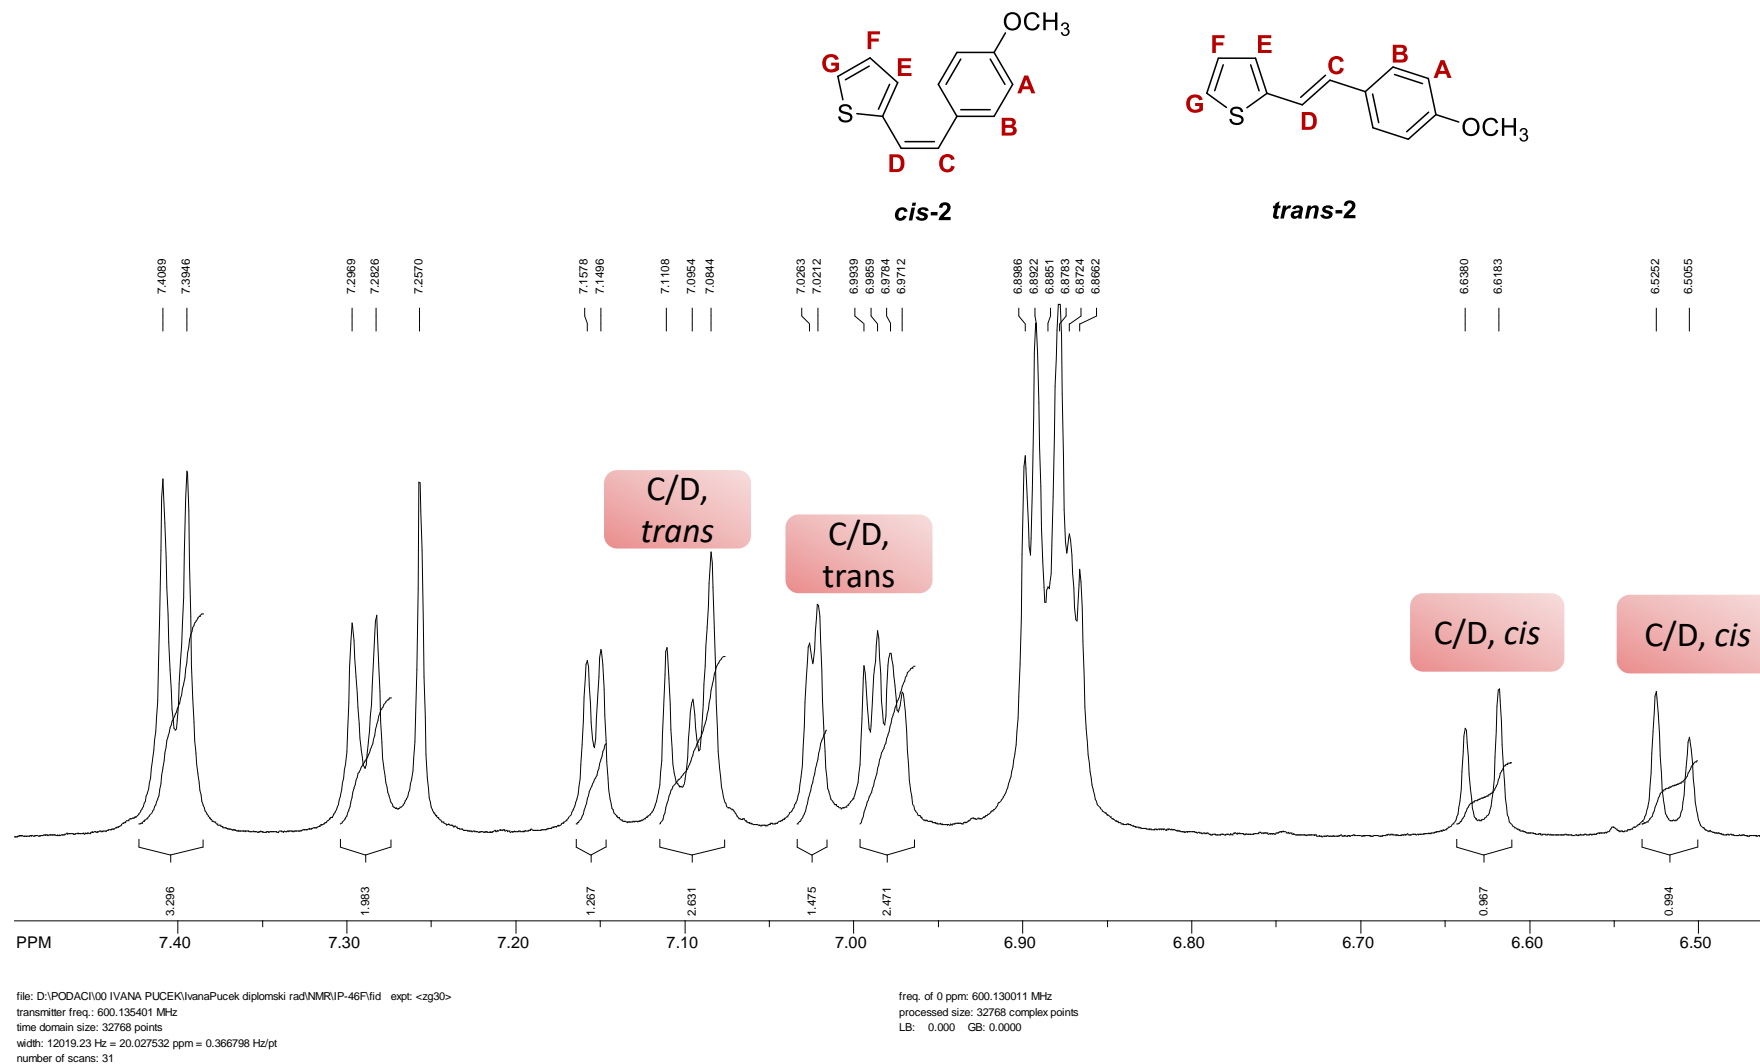

## Mass spectra and HRMS analysis of the mixture of geometrical isomers of 2-(4-methoxystyryl)thiophene (*cis*-2 and *trans*-2)

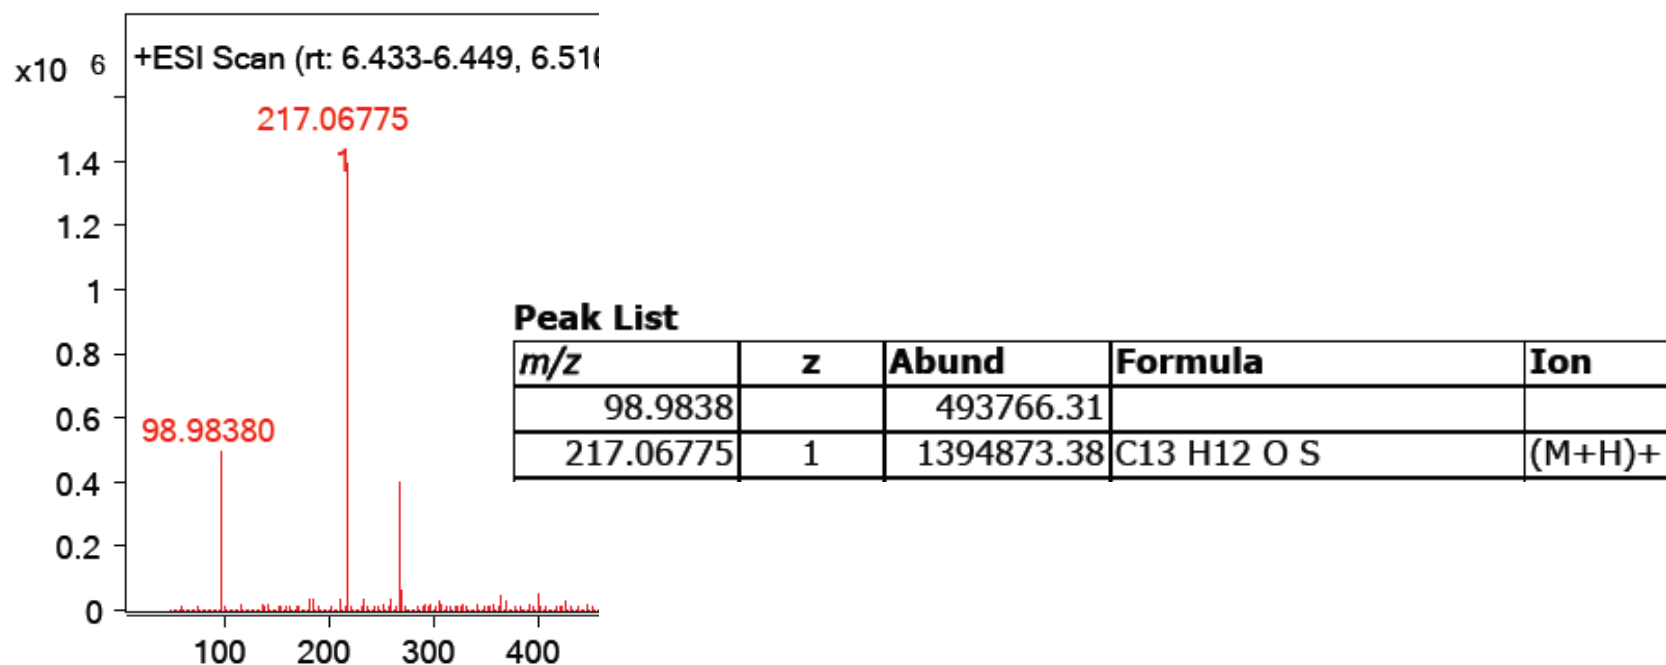

### Formula Calculator Results

| Formula                             | Best | Mass      | Tgt Mass  | Diff (ppm) | Ion Species                         | Score |
|-------------------------------------|------|-----------|-----------|------------|-------------------------------------|-------|
| C <sub>13</sub> H <sub>12</sub> O S | True | 216.06052 | 216.06089 | 1.7        | C <sub>13</sub> H <sub>13</sub> O S | 97.61 |

**$^1\text{H}$  NMR spectrum (600 MHz,  $\text{CDCl}_3$ ) of the mixture of geometrical isomers of 2-(4-chlorostyryl)thiophene (*cis*-3 and *trans*-3)**

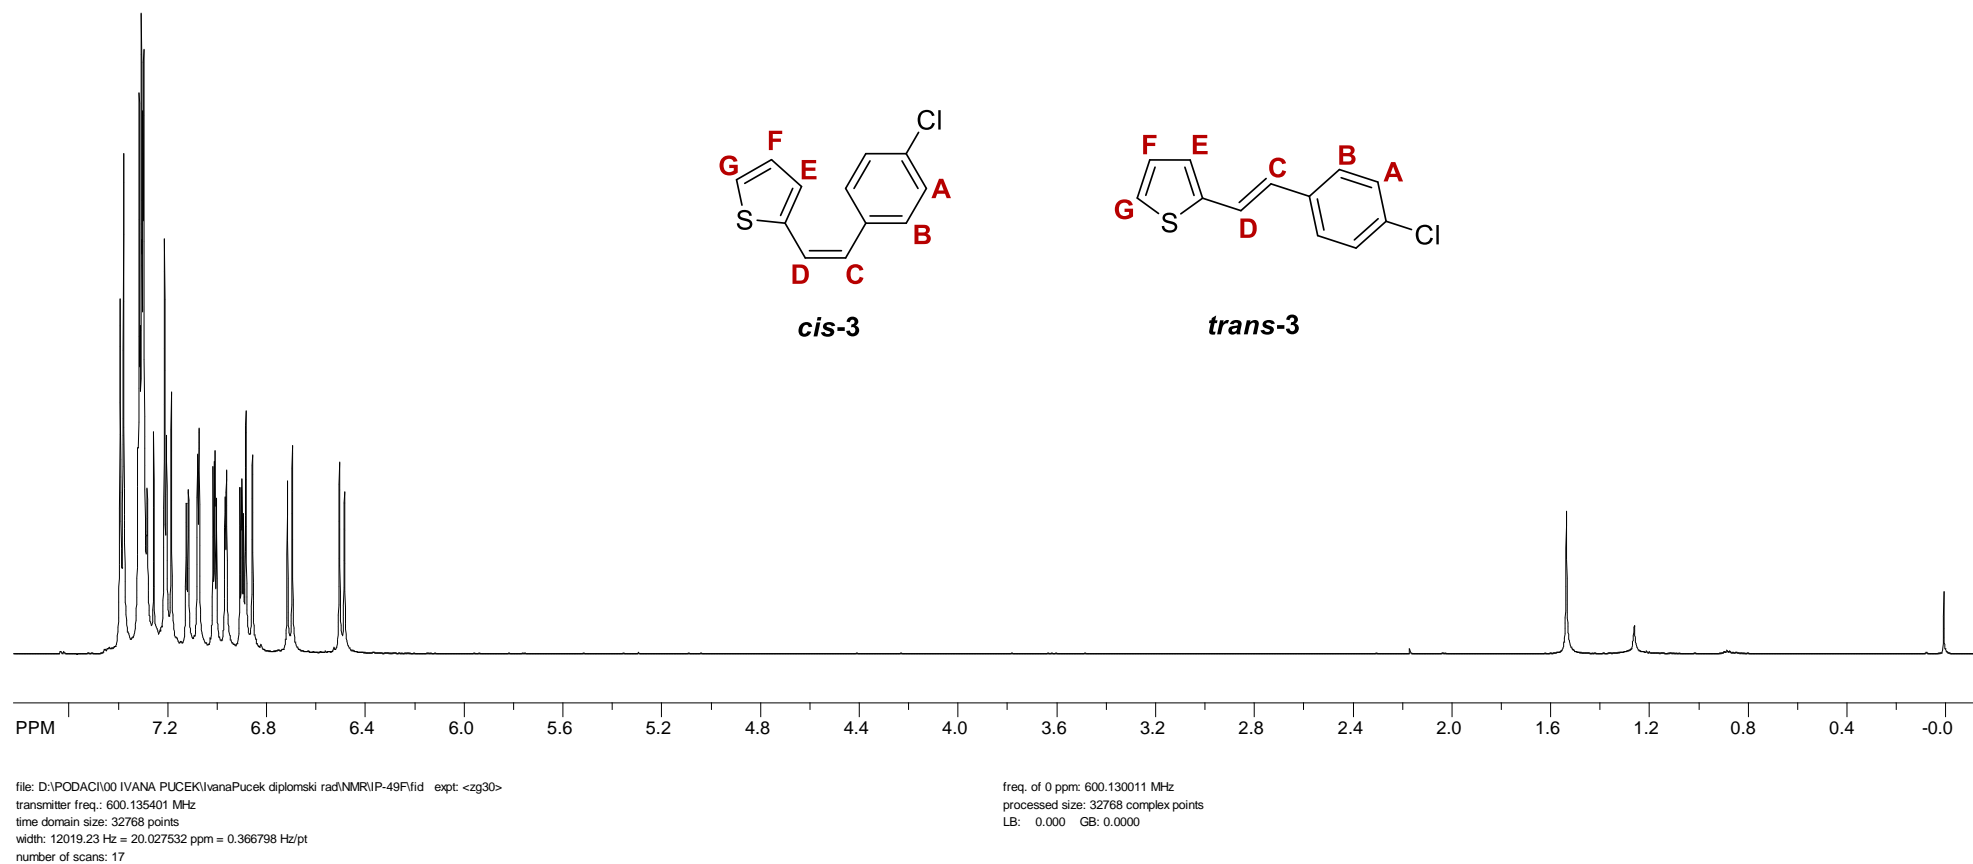

A part of the  $^1\text{H}$  NMR spectrum (600 MHz,  $\text{CDCl}_3$ ) of the mixture of geometrical isomers of 2-(4-chlorostyryl)thiophene (*cis*-3 and *trans*-3)

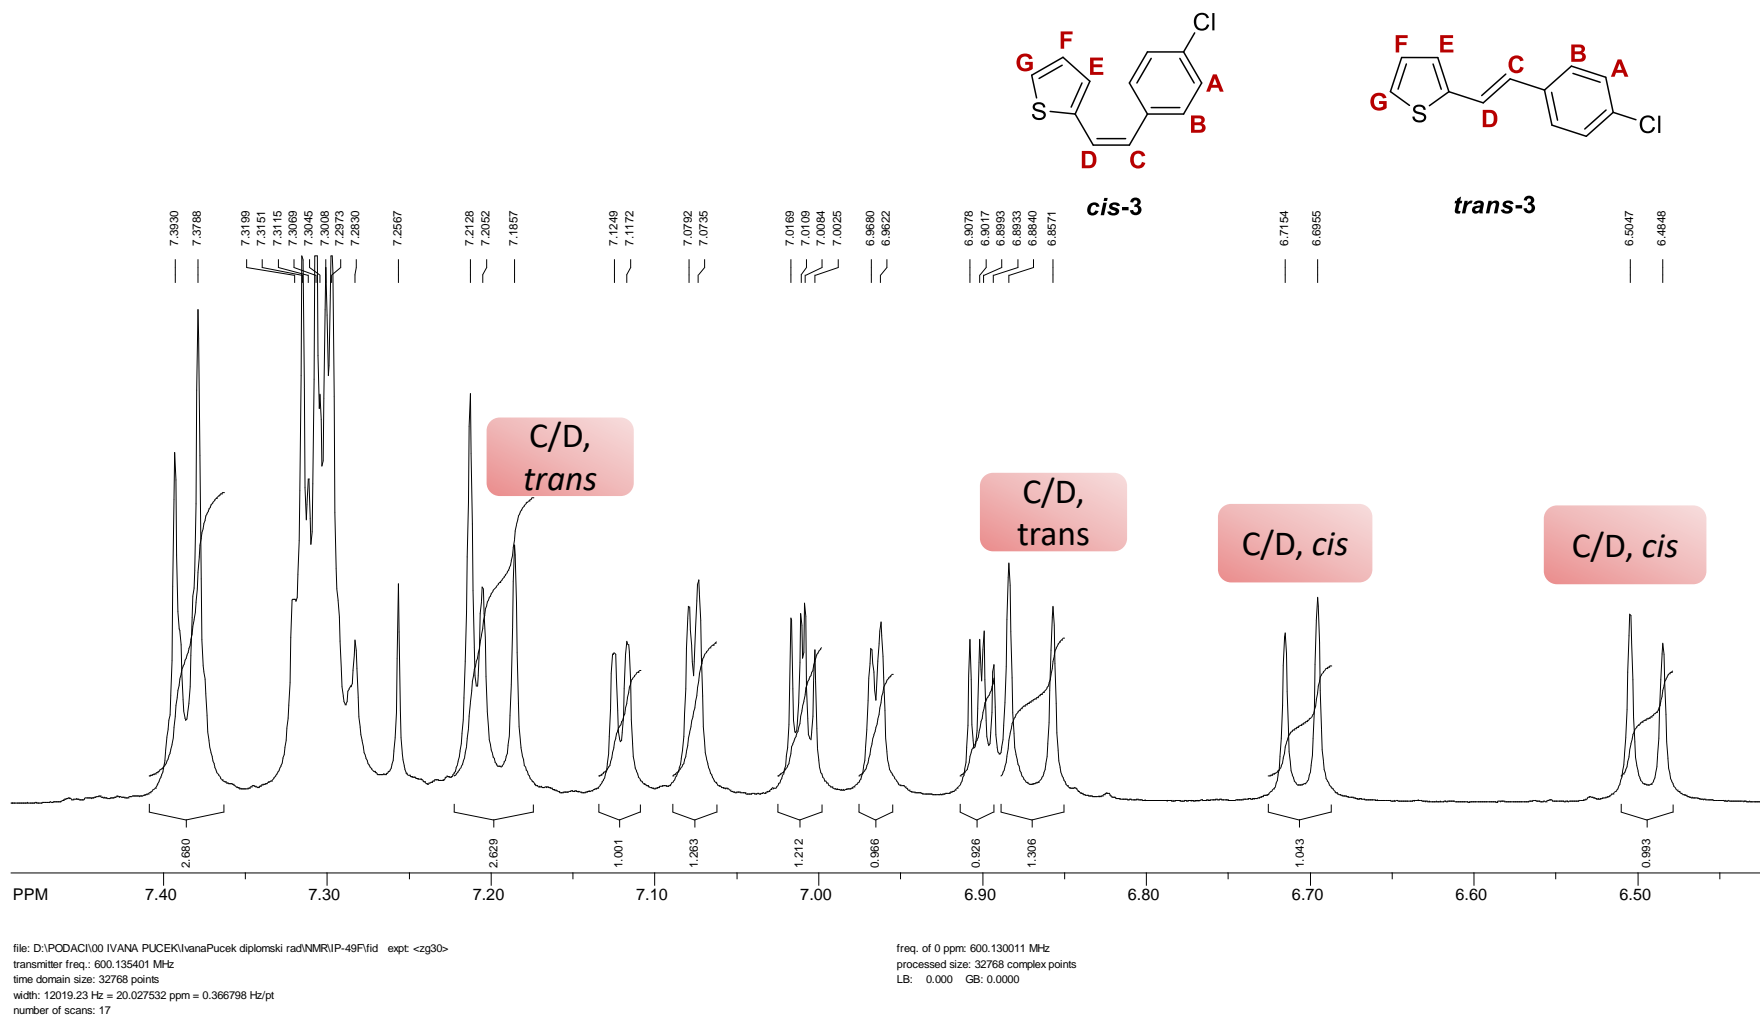

## Mass spectra and HRMS analysis of the mixture of geometrical isomers of 2-(4-chlorostyryl)thiophene (*cis*-3 and *trans*-3)

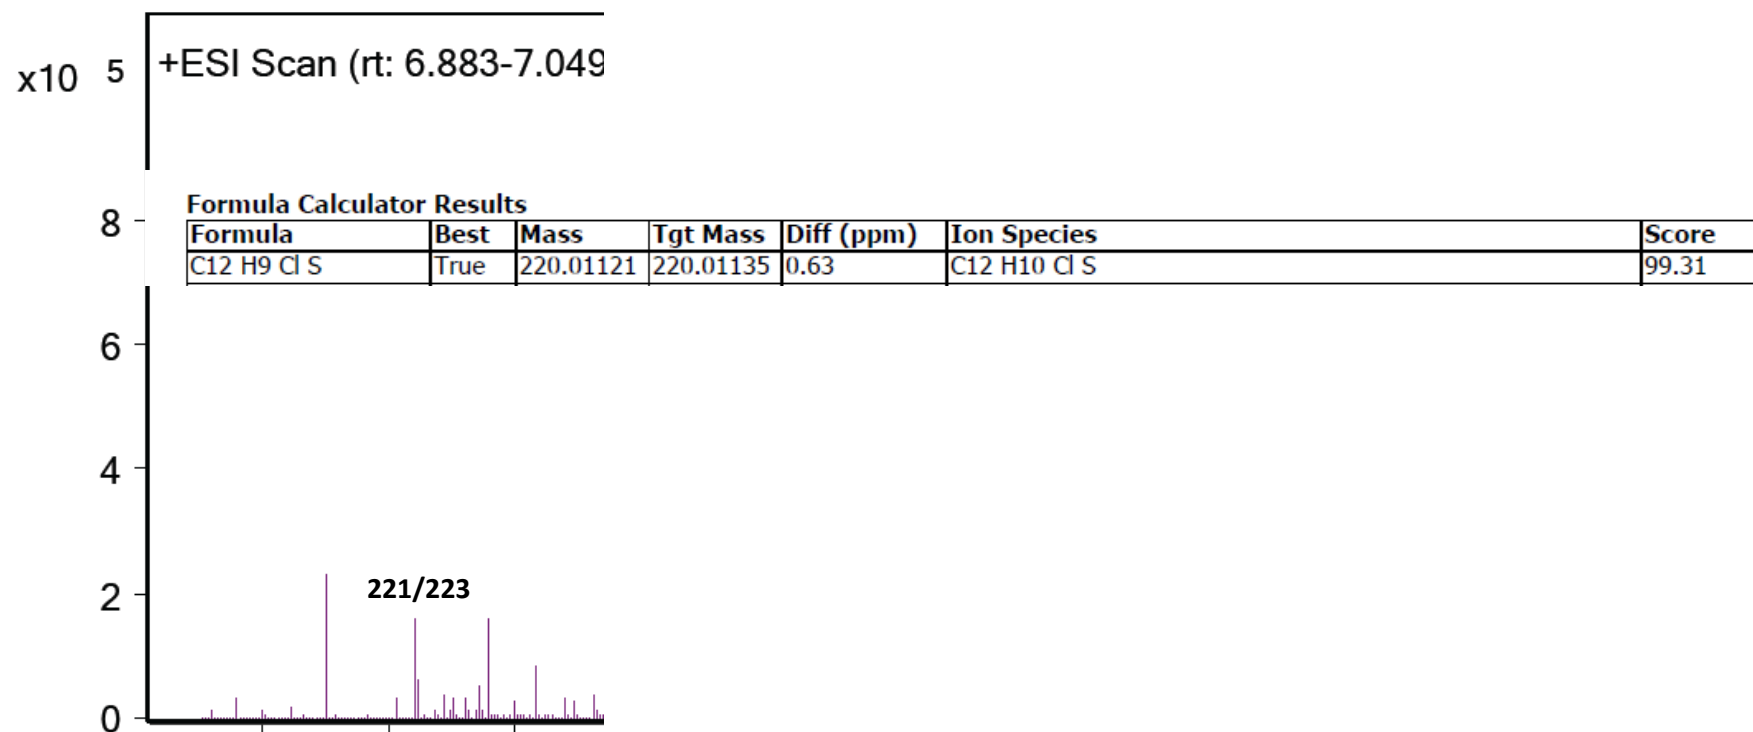

**<sup>1</sup>H NMR spectrum (600 MHz, CDCl<sub>3</sub>) of the mixture of geometrical isomers of 2-(4-(2-(thiophen-2-yl)vinyl)benzonitrile (*cis*-4 and *trans*-4))**

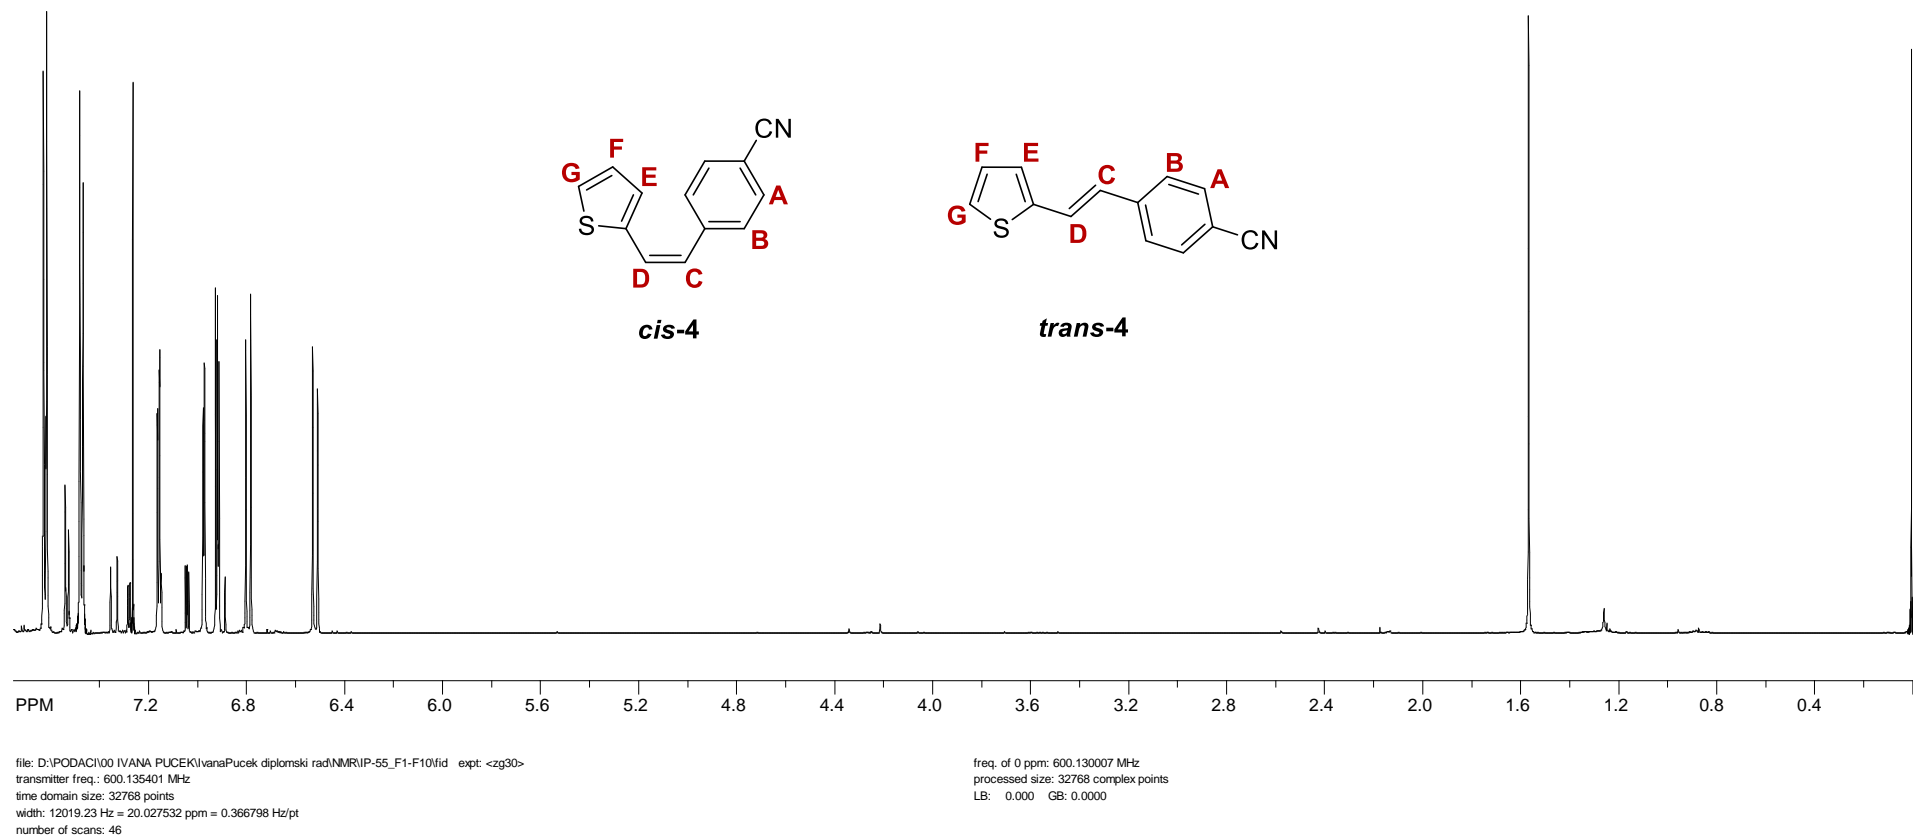

A part of the  $^1\text{H}$  NMR spectrum (600 MHz,  $\text{CDCl}_3$ ) of the mixture of geometrical isomers of 2-(4-(2-(thiophen-2-yl)vinyl)benzonitrile (*cis*-4 and *trans*-4)

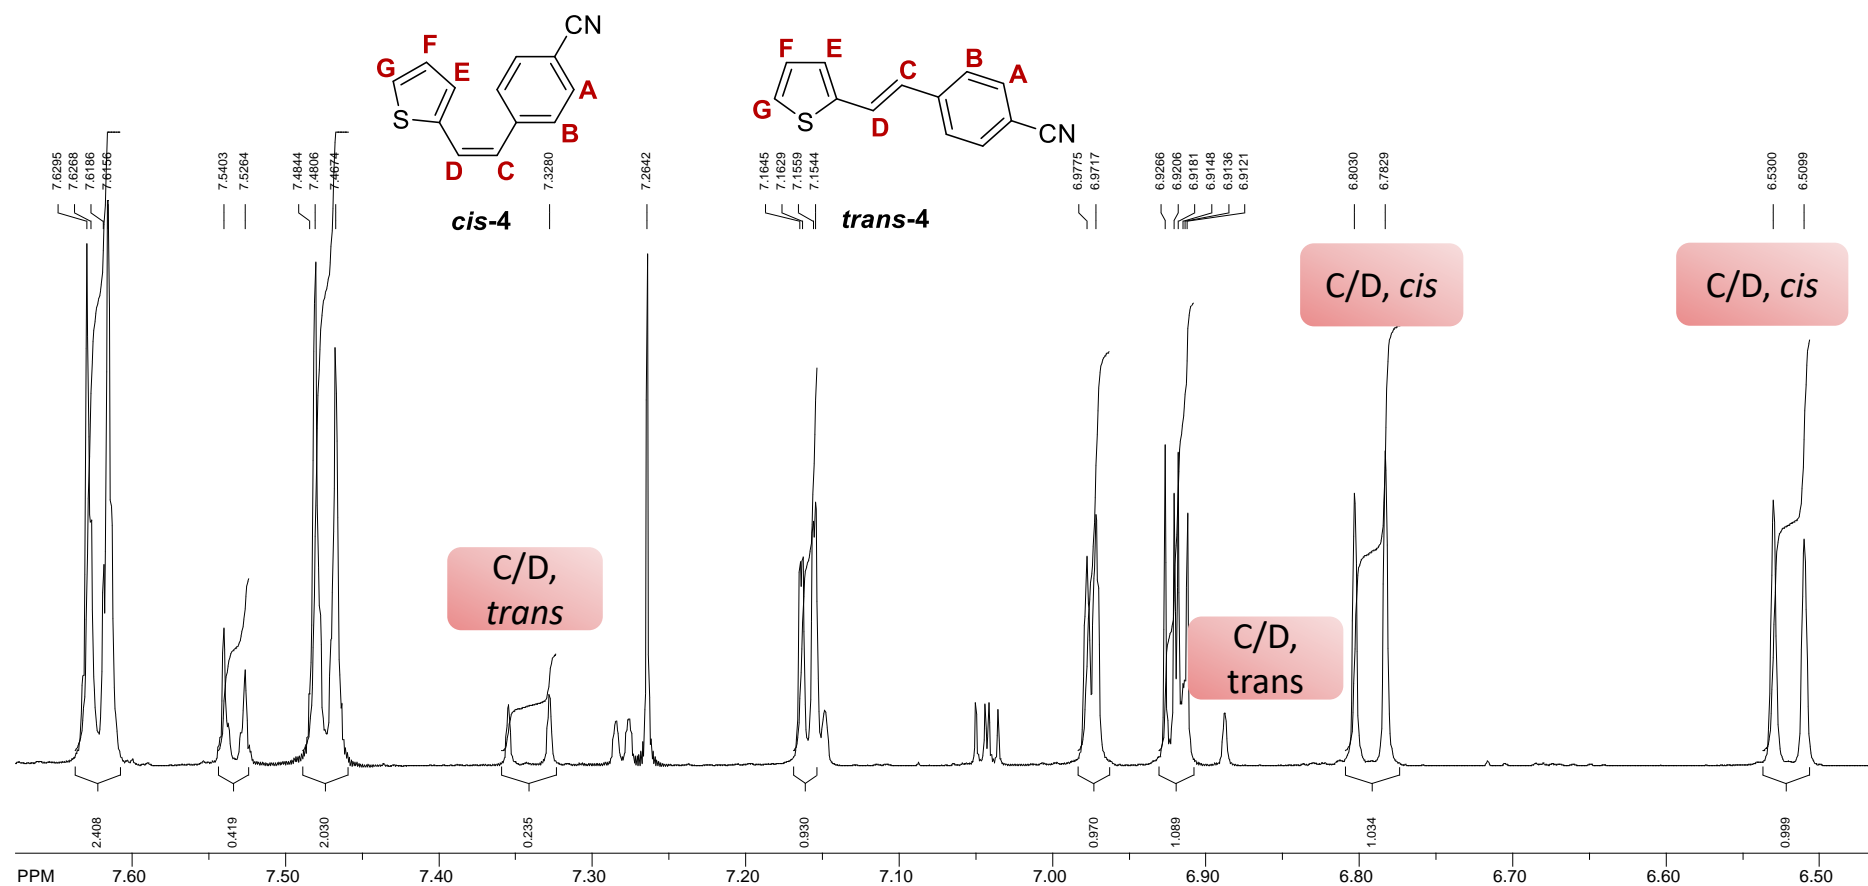

file: D:\PODACI\00 IVANA PUCEK\IvanaPucek diplomski rad\NMR\IP-55\_F1-F10\fid exp: <zg30>  
transmitter freq.: 600.135401 MHz  
time domain size: 32768 points  
width: 12019.23 Hz = 20.027532 ppm = 0.366798 Hz/pt  
number of scans: 46

freq. of 0 ppm: 600.130007 MHz  
processed size: 32768 complex points  
LB: 0.000 GB: 0.0000



**Mass spectra and HRMS analysis of the mixture of geometrical isomers of 2-(4-(2-(thiophen-2-yl)vinyl)benzonitrile (*cis*-4 and *trans*-4)**

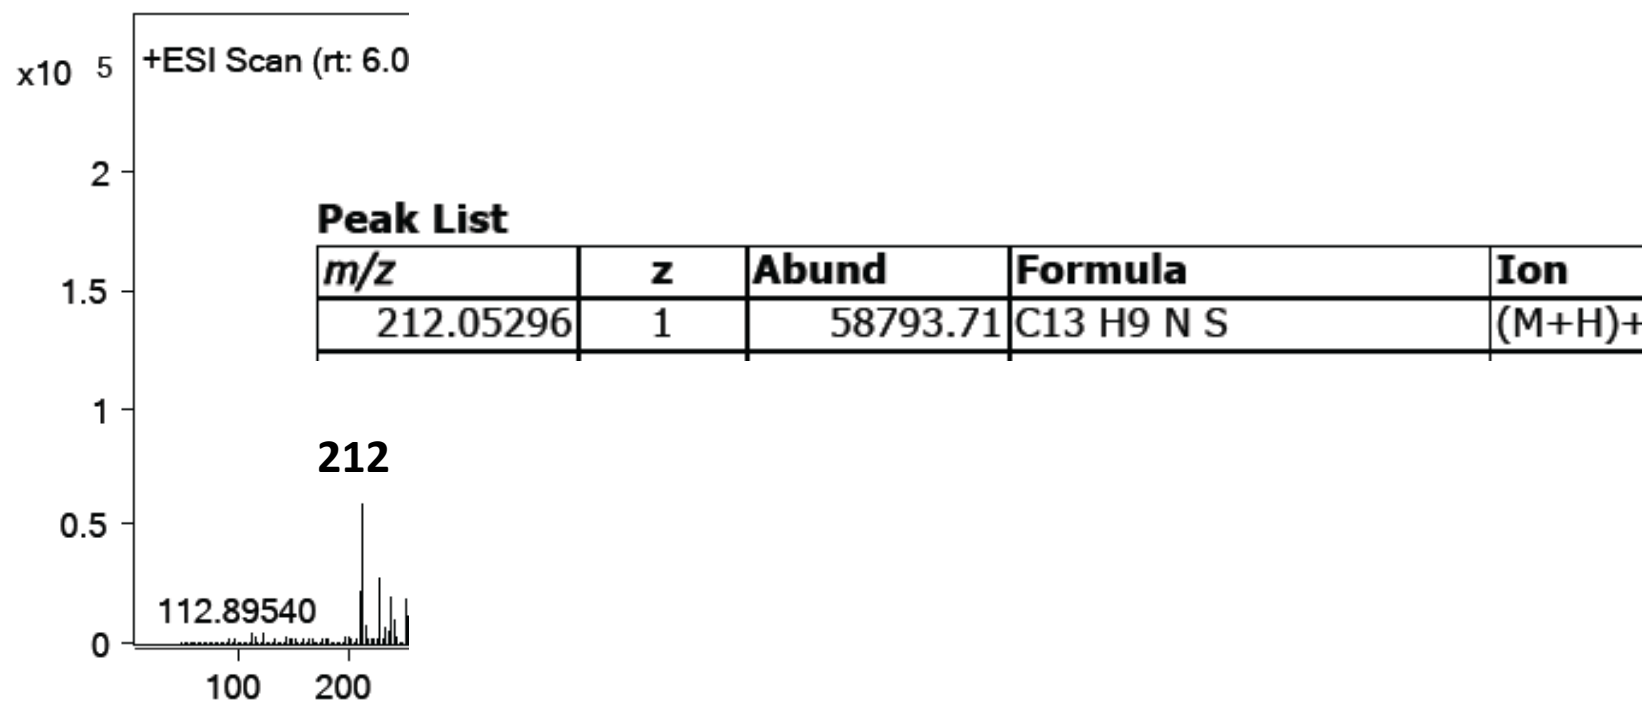

**<sup>1</sup>H NMR spectrum (600 MHz, CDCl<sub>3</sub>) of the mixture of geometrical isomers of 2-(4-nitrostyryl)thiophene (*cis*-5 and *trans*-5) with a certain amount of *p*-nitrotoluene (separated by column chromatography after formylation)**

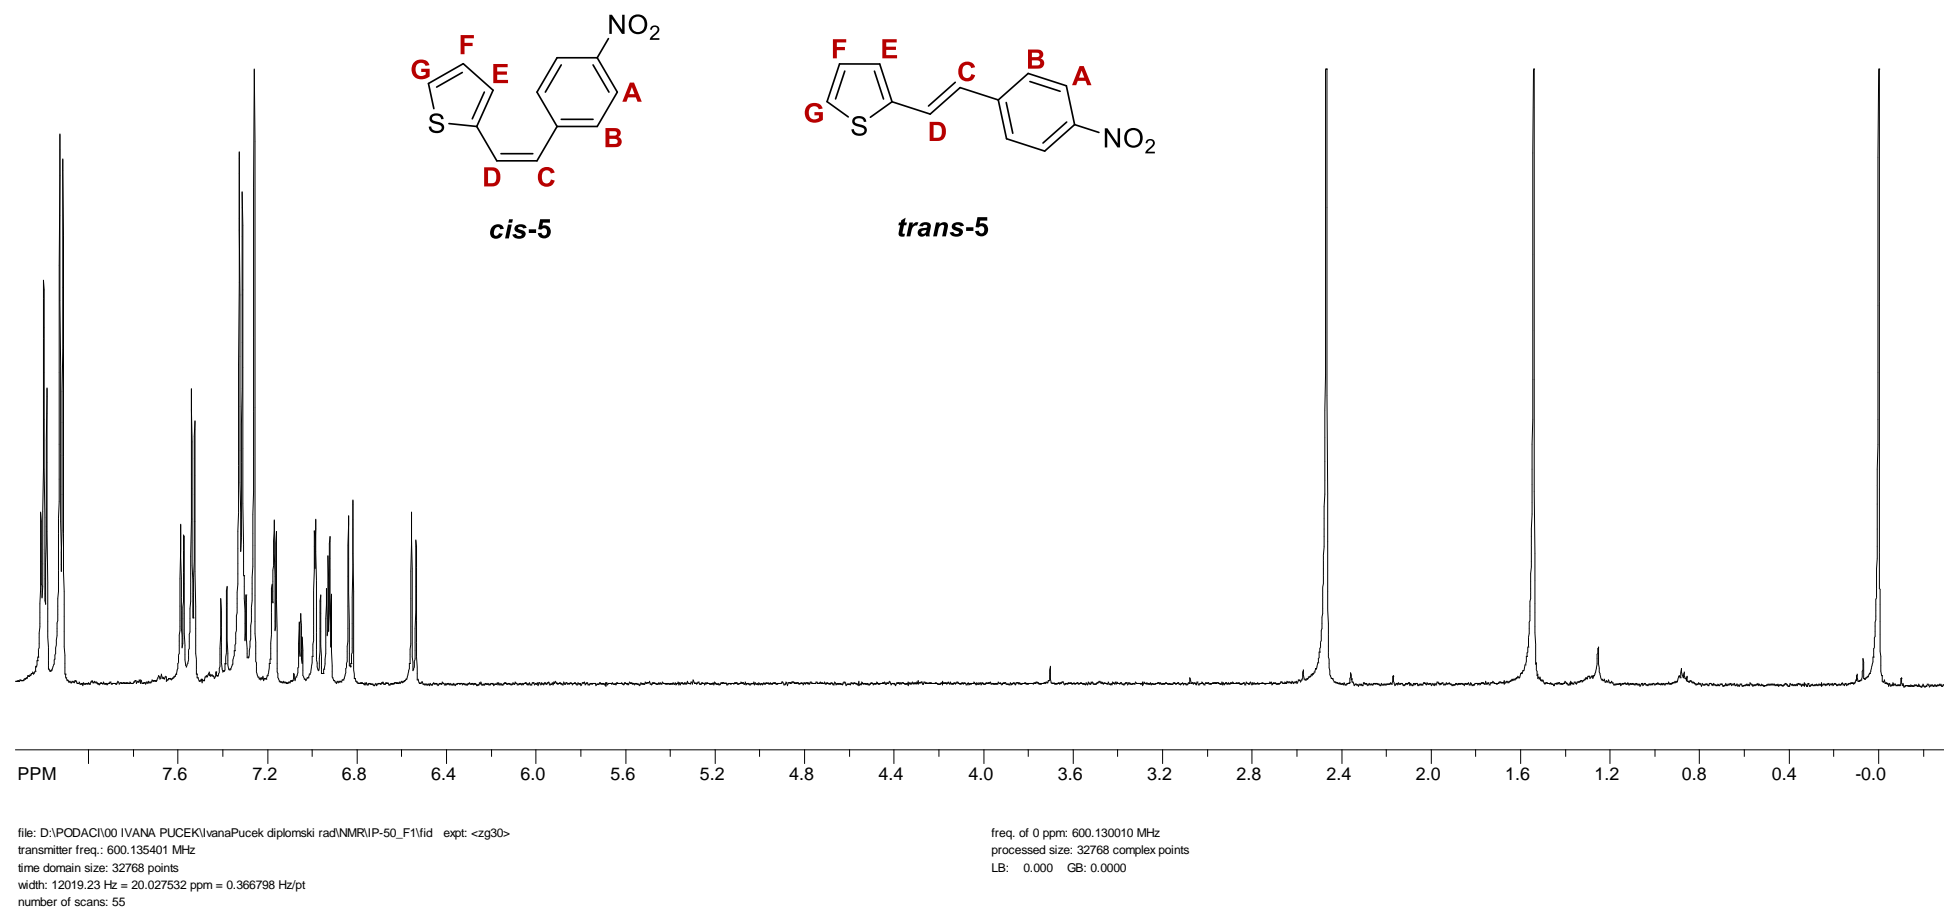

A part of the  $^1\text{H}$  NMR spectrum (600 MHz,  $\text{CDCl}_3$ ) of the mixture of geometrical isomers of 2-(4-nitrostyryl)thiophene (*cis*-5 and *trans*-5) with a certain amount of p-nitrotoluene (separated by column chromatography after formylation)

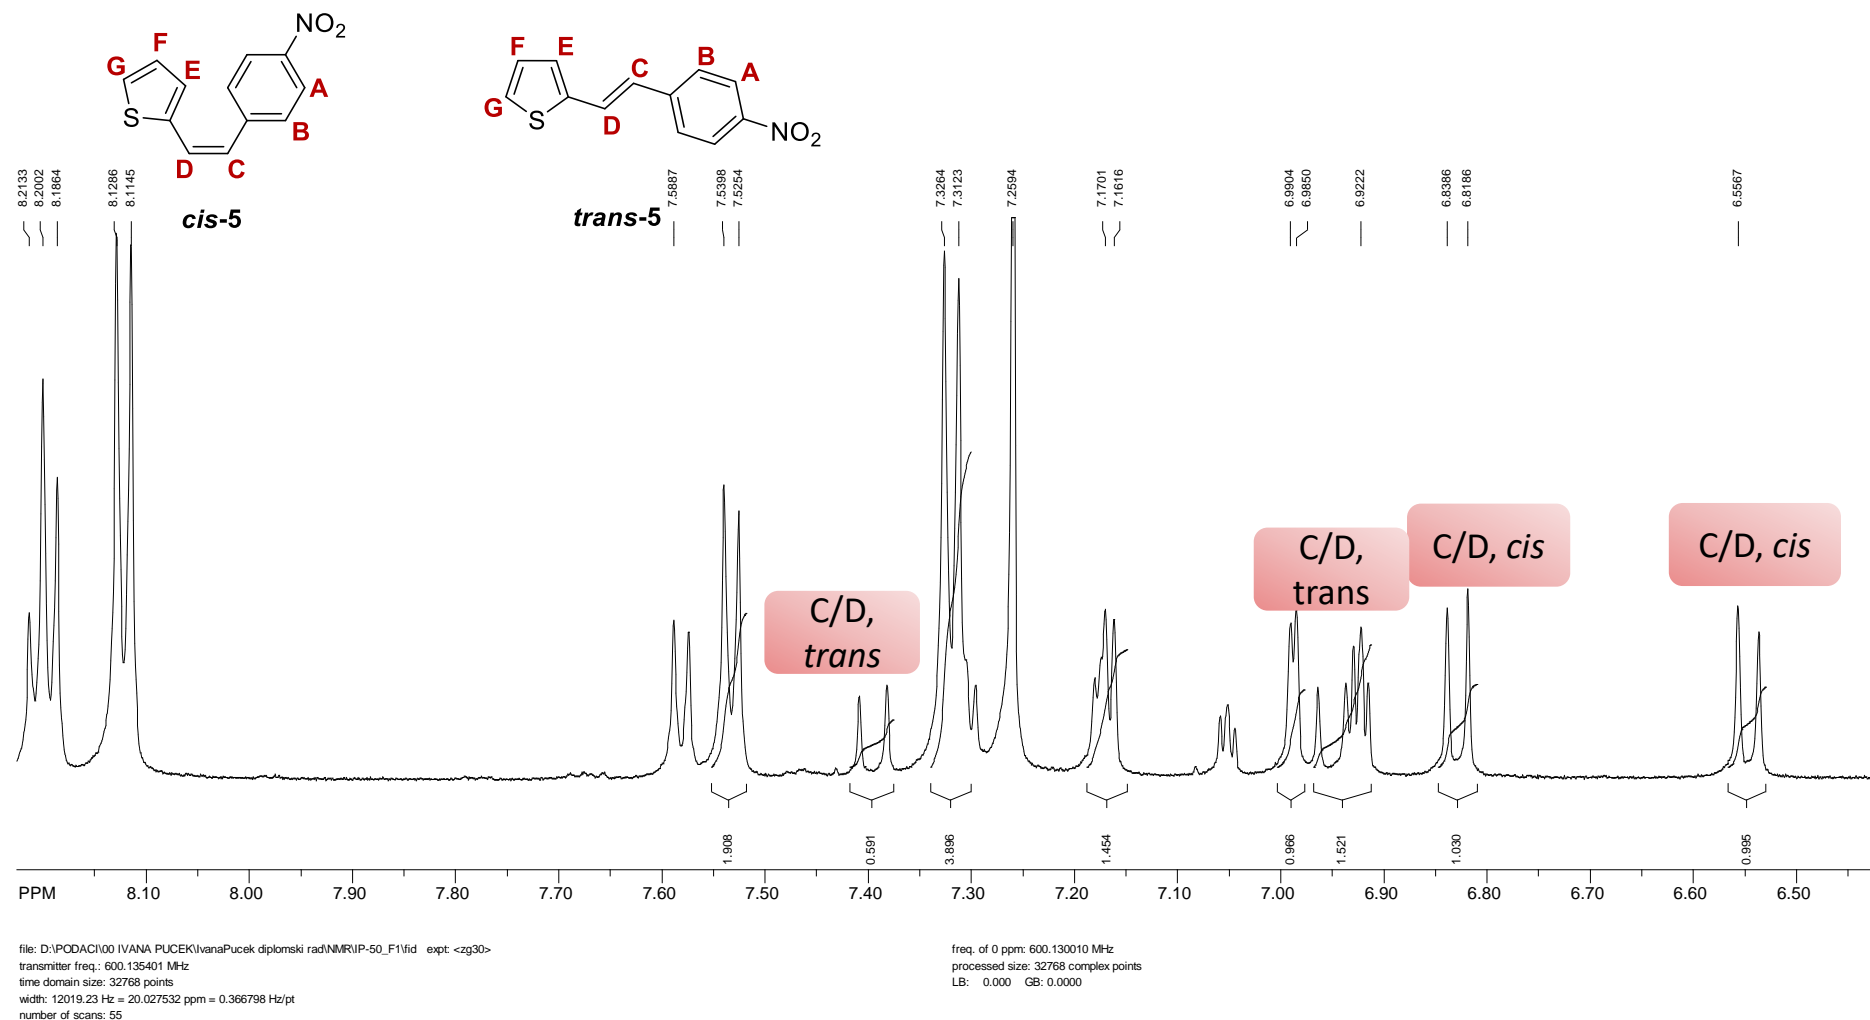

## Mass spectra and HRMS analysis of the mixture of geometrical isomers of 2-(4-nitrostyryl)thiophene (*cis*-5 and *trans*-5)

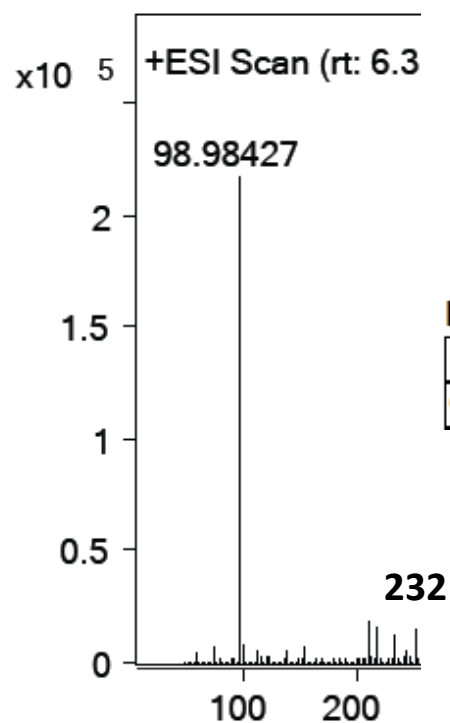

### Formula Calculator Results

| Formula       | Best | Mass      | Tgt Mass |
|---------------|------|-----------|----------|
| C12 H9 N O2 S | True | 231.03565 | 231.0354 |

**<sup>1</sup>H NMR spectrum (600 MHz, CDCl<sub>3</sub>) of the mixture of geometrical isomers of *N,N*-dimethyl-4-(2-(thiophen-2-yl)vinyl)aniline (*cis*-6 and *trans*-6)**

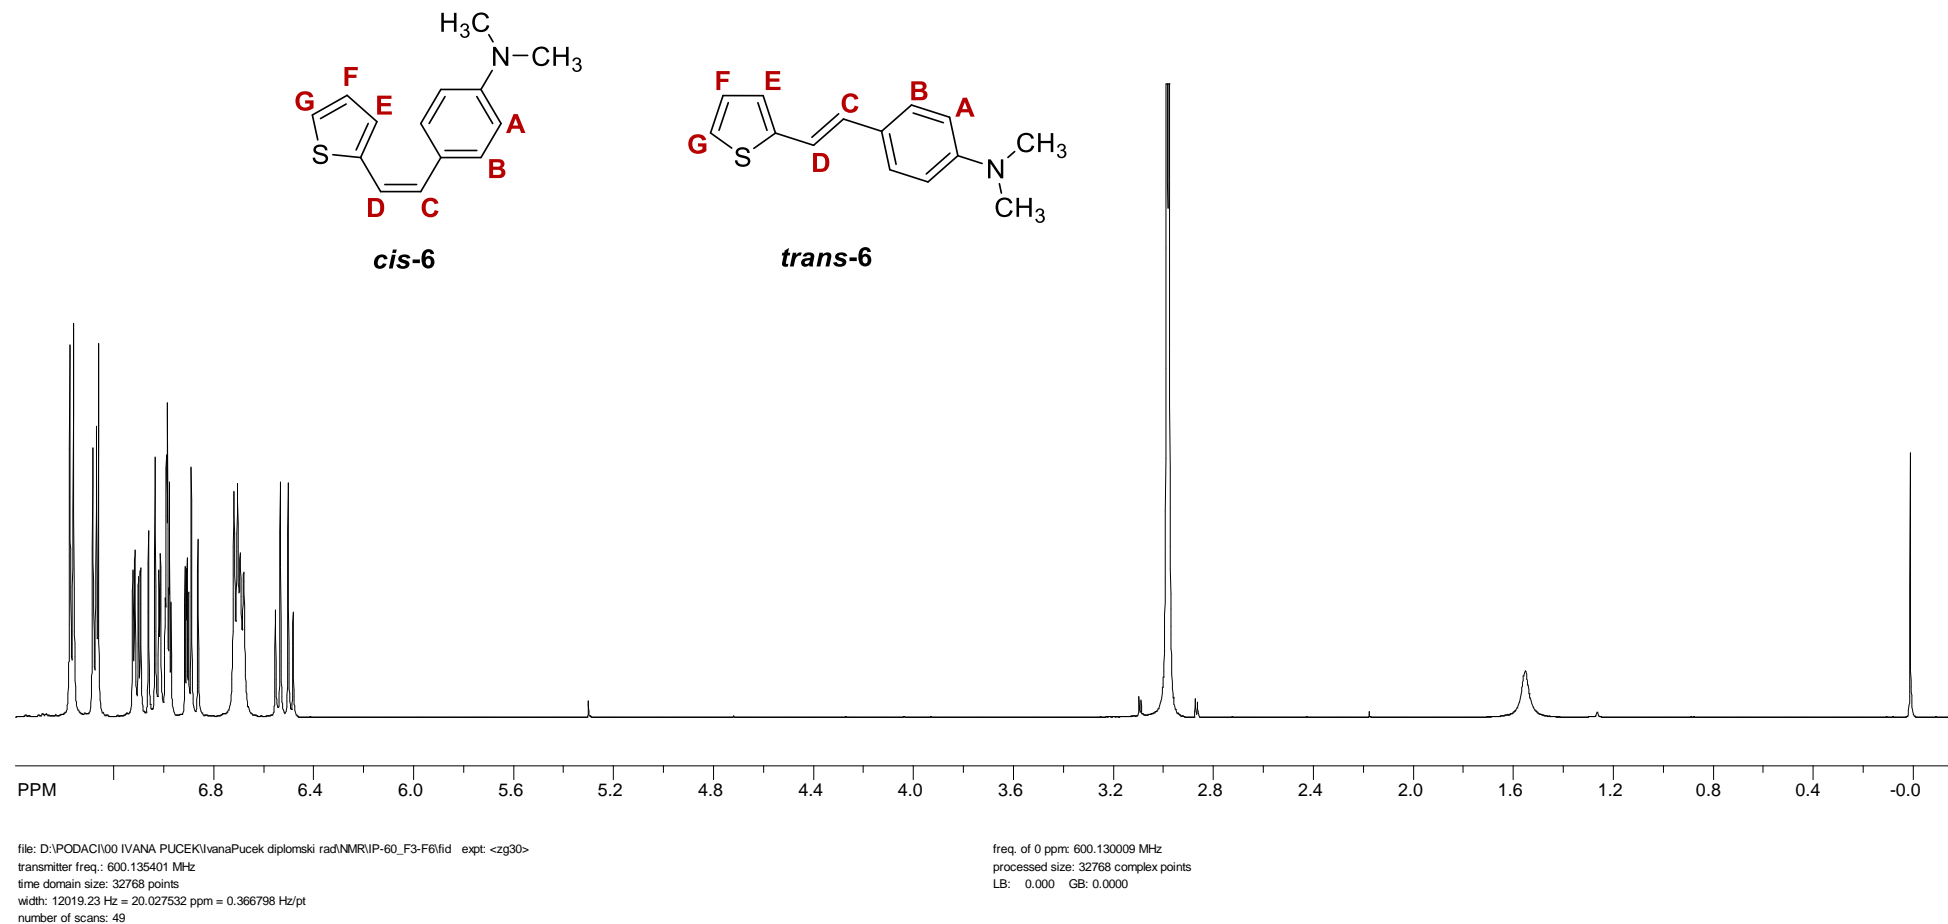

A part of the  $^1\text{H}$  NMR spectrum (600 MHz,  $\text{CDCl}_3$ ) of the mixture of geometrical isomers of *N,N*-dimethyl-4-(2-(thiophen-2-yl)vinyl)aniline (*cis*-6 and *trans*-6)

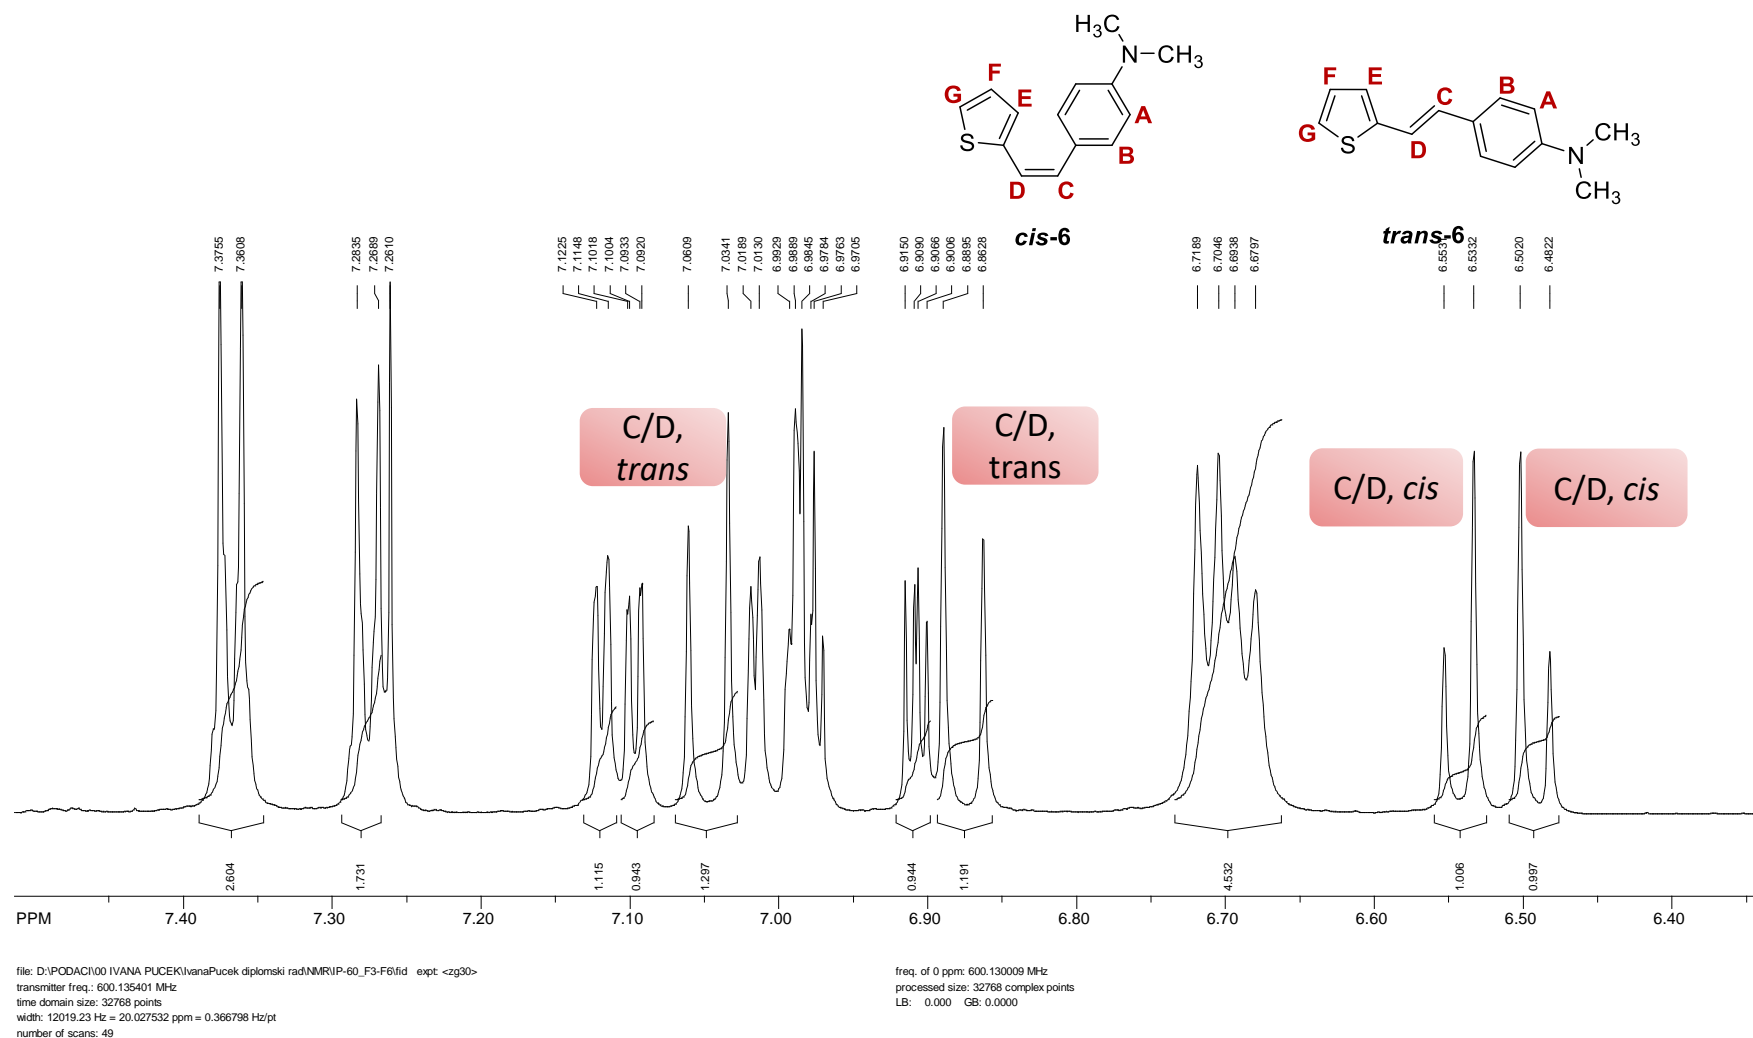

**Mass spectra and HRMS analysis of the mixture of geometrical isomers of *N,N*-dimethyl-4-(2-(thiophen-2-yl)vinyl)aniline (*cis*-6 and *trans*-6)**

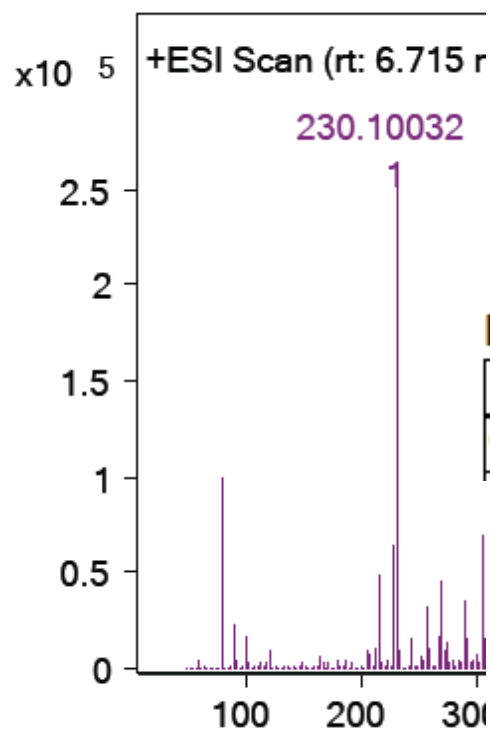

**Formula Calculator Results**

| Formula     | Best | Mass      | Tgt Mass  |
|-------------|------|-----------|-----------|
| C14 H15 N S | True | 229.09286 | 229.09252 |

**$^1\text{H}$  NMR spectrum (600 MHz,  $\text{CDCl}_3$ ) of the mixture of geometrical isomers of 5-(4-methylstyryl)thiophene-2-carbaldehyde (*cis*-7 and *trans*-7)**

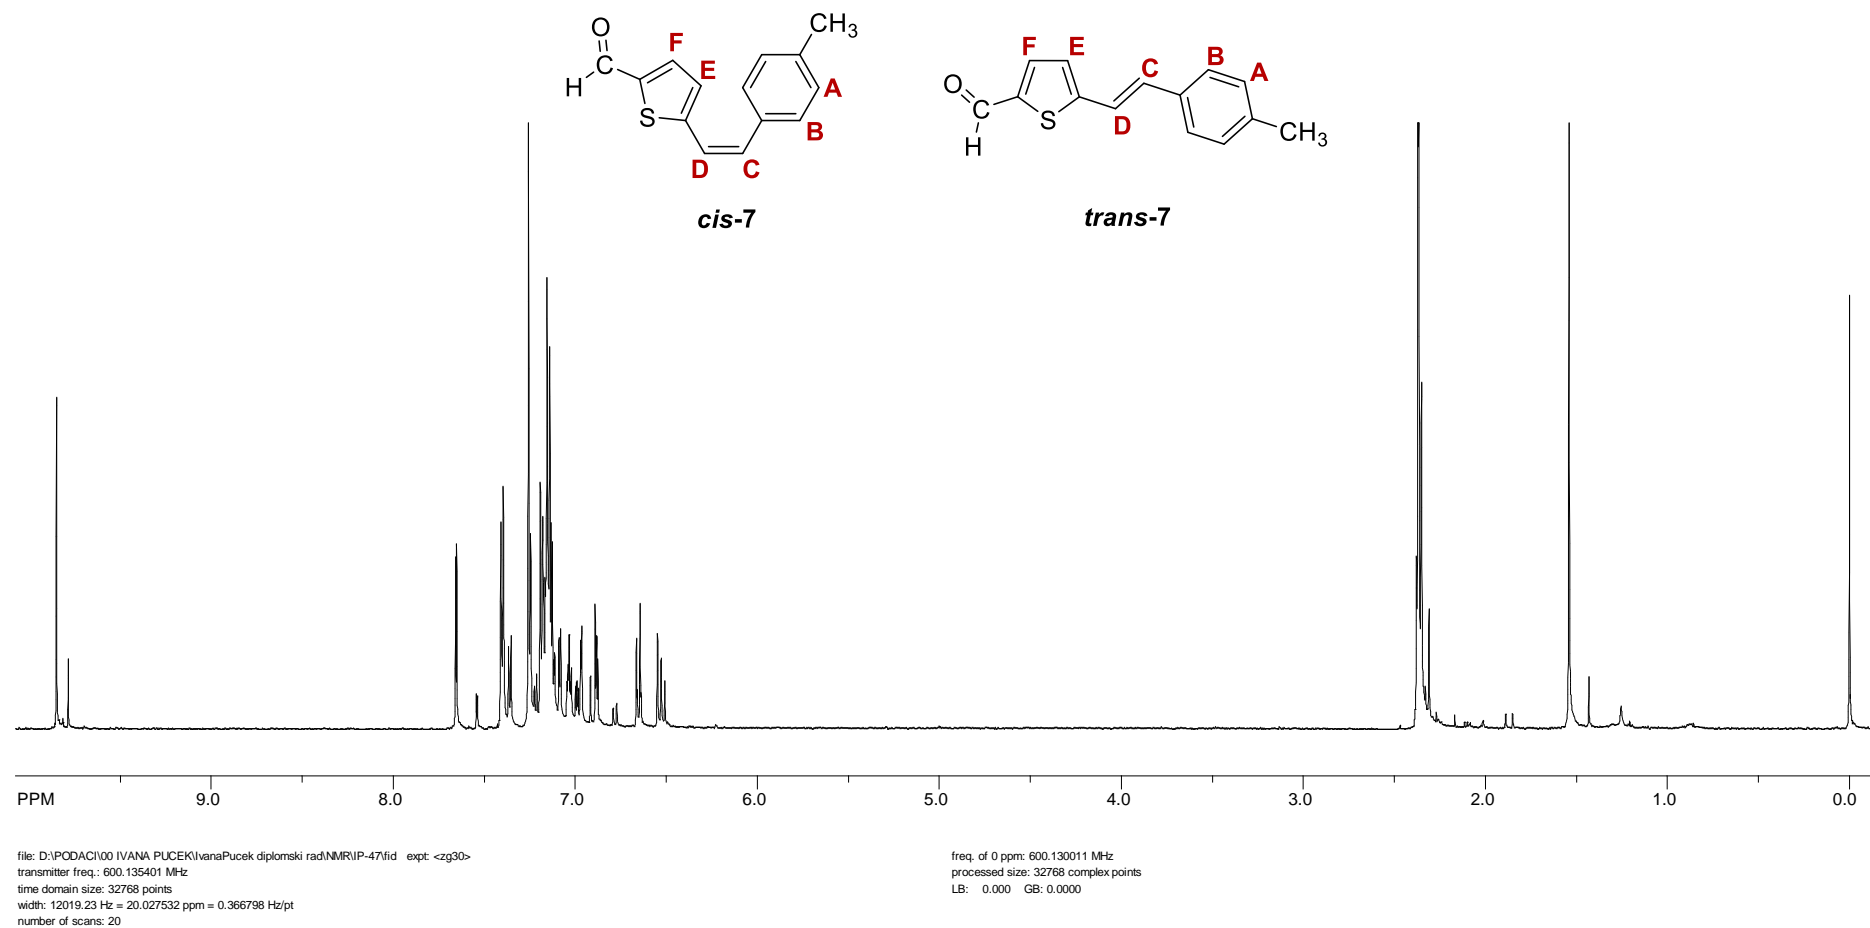



A part of the  $^1\text{H}$  NMR spectrum (600 MHz,  $\text{CDCl}_3$ ) of the mixture of geometrical isomers of 5-(4-methylstyryl)thiophene-2-carbaldehyde (*cis*-7 and *trans*-7)

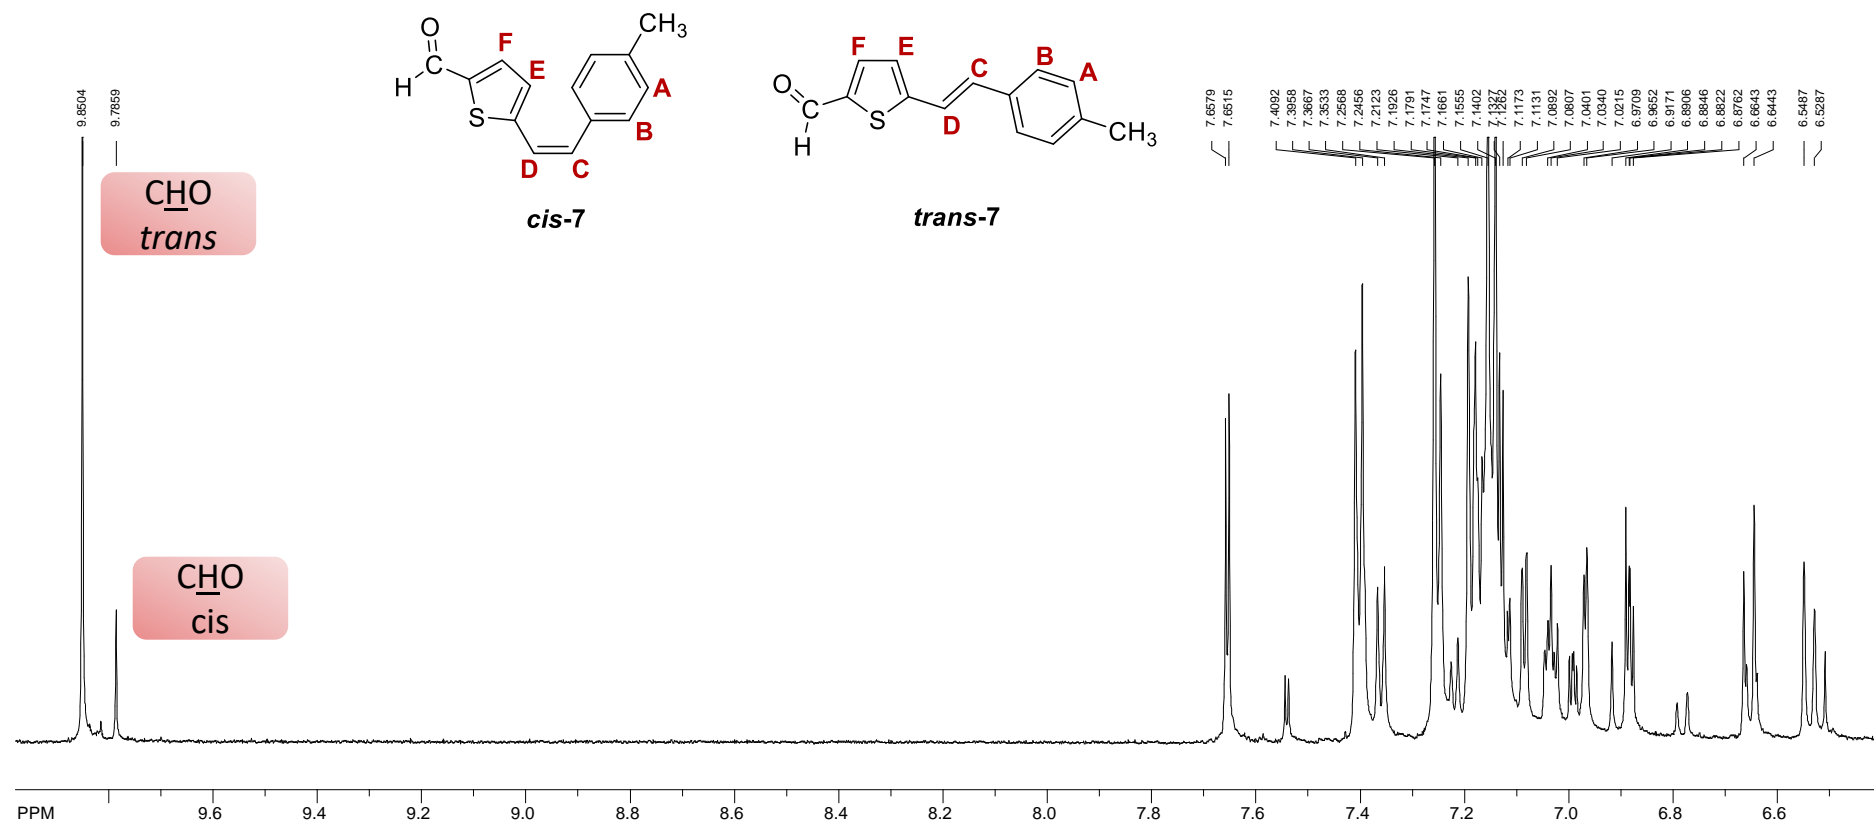

file: D:\PODACI\00 IVANA PUCEK\IvanaPucek diplomski rad\NMR\JP-47\fid exp: <zg30>  
transmitter freq.: 600.135401 MHz  
time domain size: 32768 points  
width: 12019.23 Hz = 20.027532 ppm = 0.366798 Hz/pt  
number of scans: 20

freq. of 0 ppm: 600.130011 MHz  
processed size: 32768 complex points  
LB: 0.000 GB: 0.0000

**Mass spectra and HRMS analysis of the mixture of geometrical isomers of 5-(4-methylstyryl)thiophene-2-carbaldehyde (*cis*-7 and *trans*-7)**

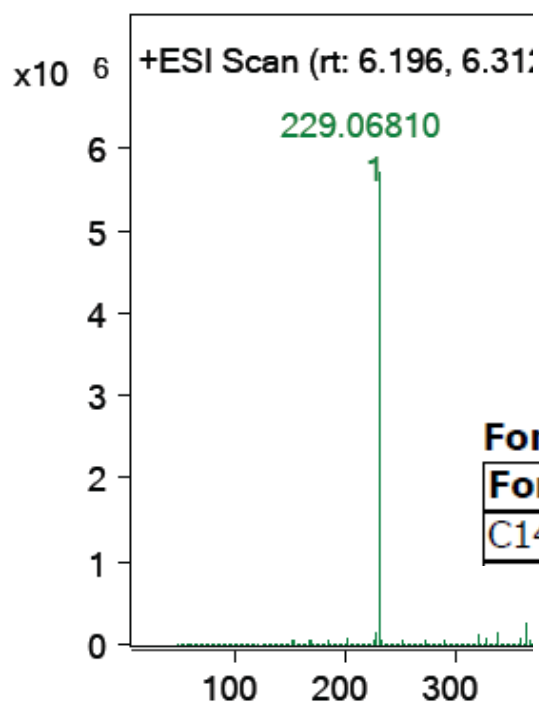

**Formula Calculator Results**

| Formula     | Best | Mass      | Tgt Mass  | Diff (ppm) |
|-------------|------|-----------|-----------|------------|
| C14 H12 O S | True | 228.06088 | 228.06089 | 0.03       |

**<sup>1</sup>H NMR spectrum (600 MHz, CDCl<sub>3</sub>) of the mixture of geometrical isomers of 5-(4-methoxystyryl)thiophene-2-carbaldehyde (*cis*-8 and *trans*-8)**

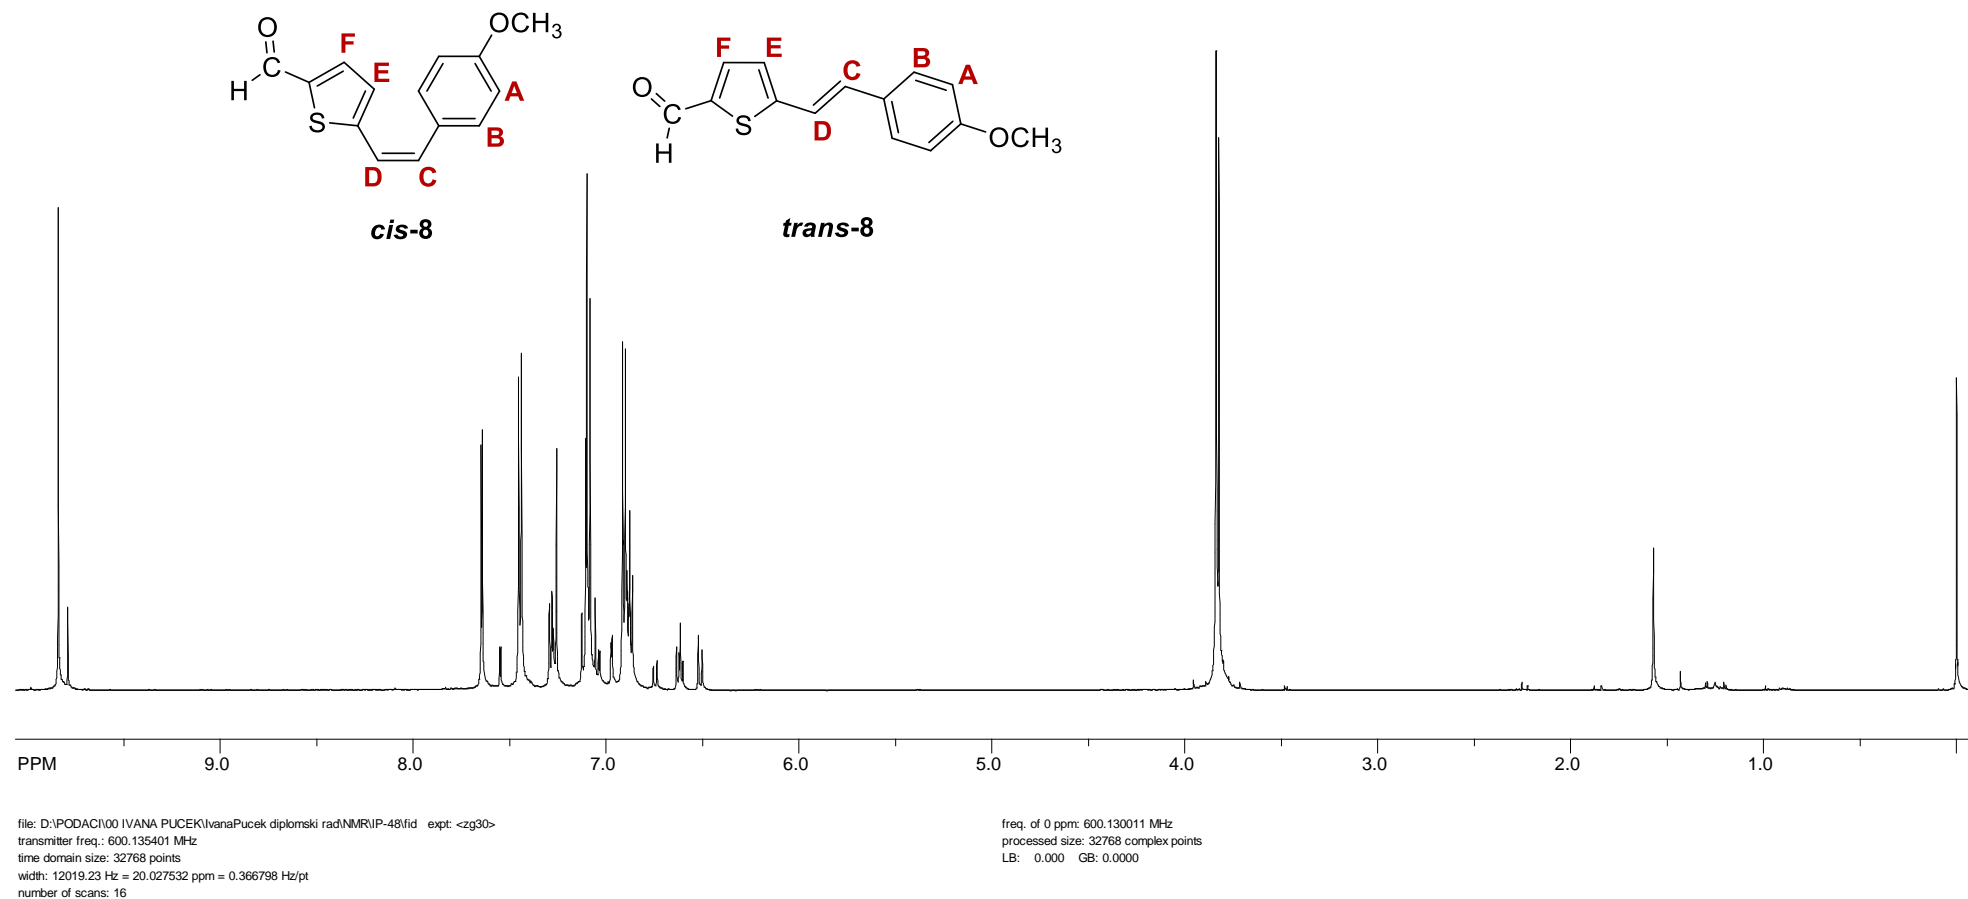

A part of the  $^1\text{H}$  NMR spectrum (600 MHz,  $\text{CDCl}_3$ ) of the mixture of geometrical isomers of 5-(4-methoxystyryl)thiophene-2-carbaldehyde (*cis*-8 and *trans*-8)

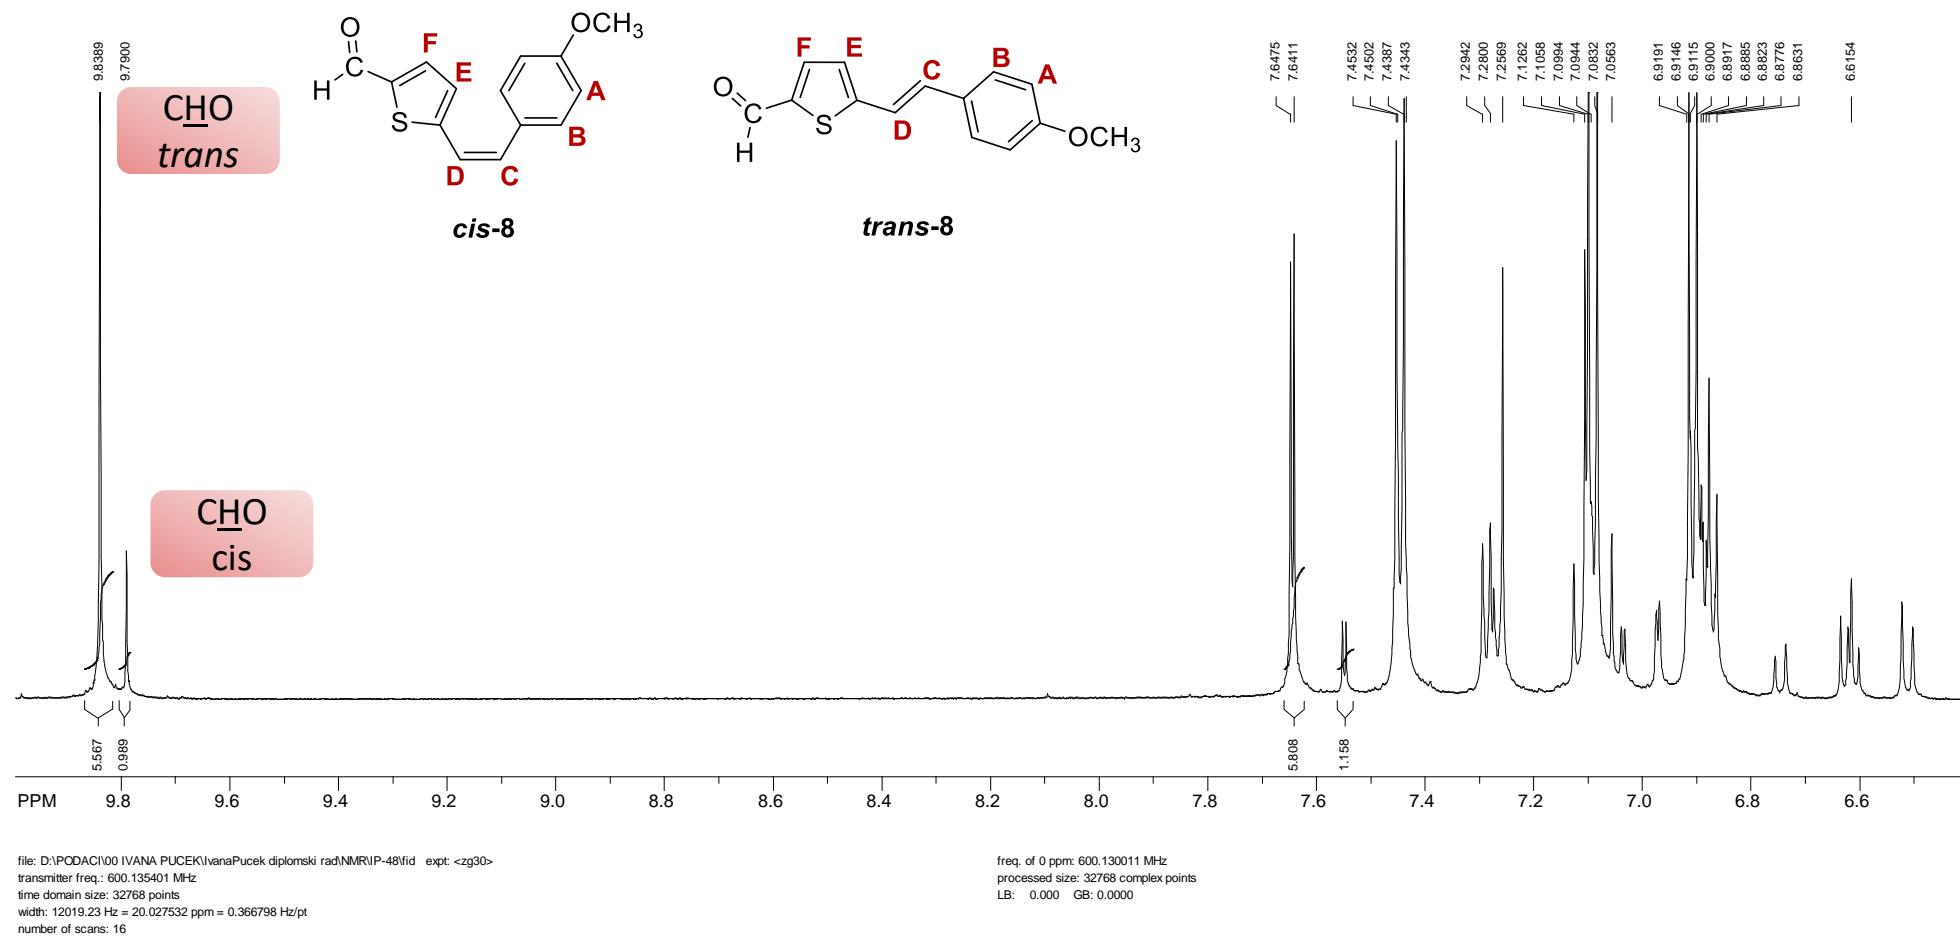

# Mass spectra and HRMS analysis of the mixture of geometrical isomers of 5-(4-methoxystyryl)thiophene-2-carbaldehyde (*cis*-8 and *trans*-8)

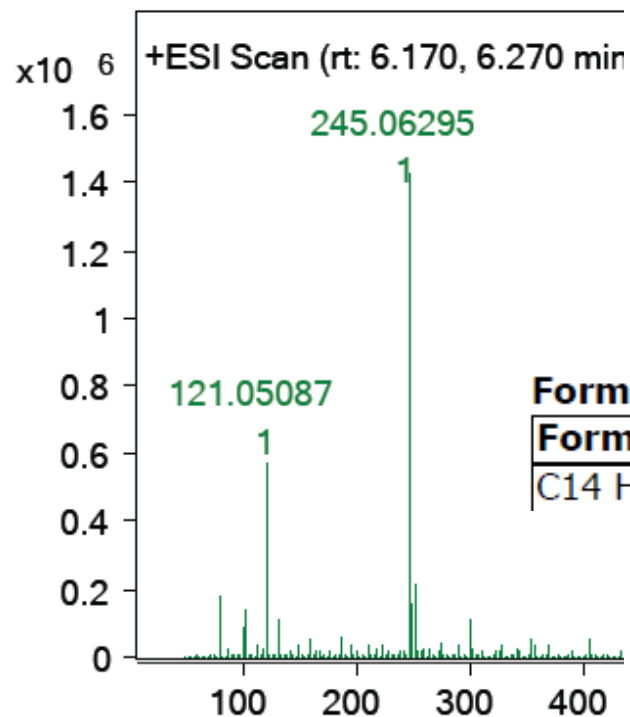

## Formula Calculator Results

| Formula      | Best | Mass      | Tgt Mass | Diff (ppm) |
|--------------|------|-----------|----------|------------|
| C14 H12 O2 S | True | 244.05573 | 244.0558 | 0.31       |

**$^1\text{H}$  NMR spectrum (600 MHz,  $\text{CDCl}_3$ ) of the mixture of geometrical isomers of 5-(4-chlorostyryl)thiophene-2-carbaldehyde (*cis*-9 and *trans*-9)**

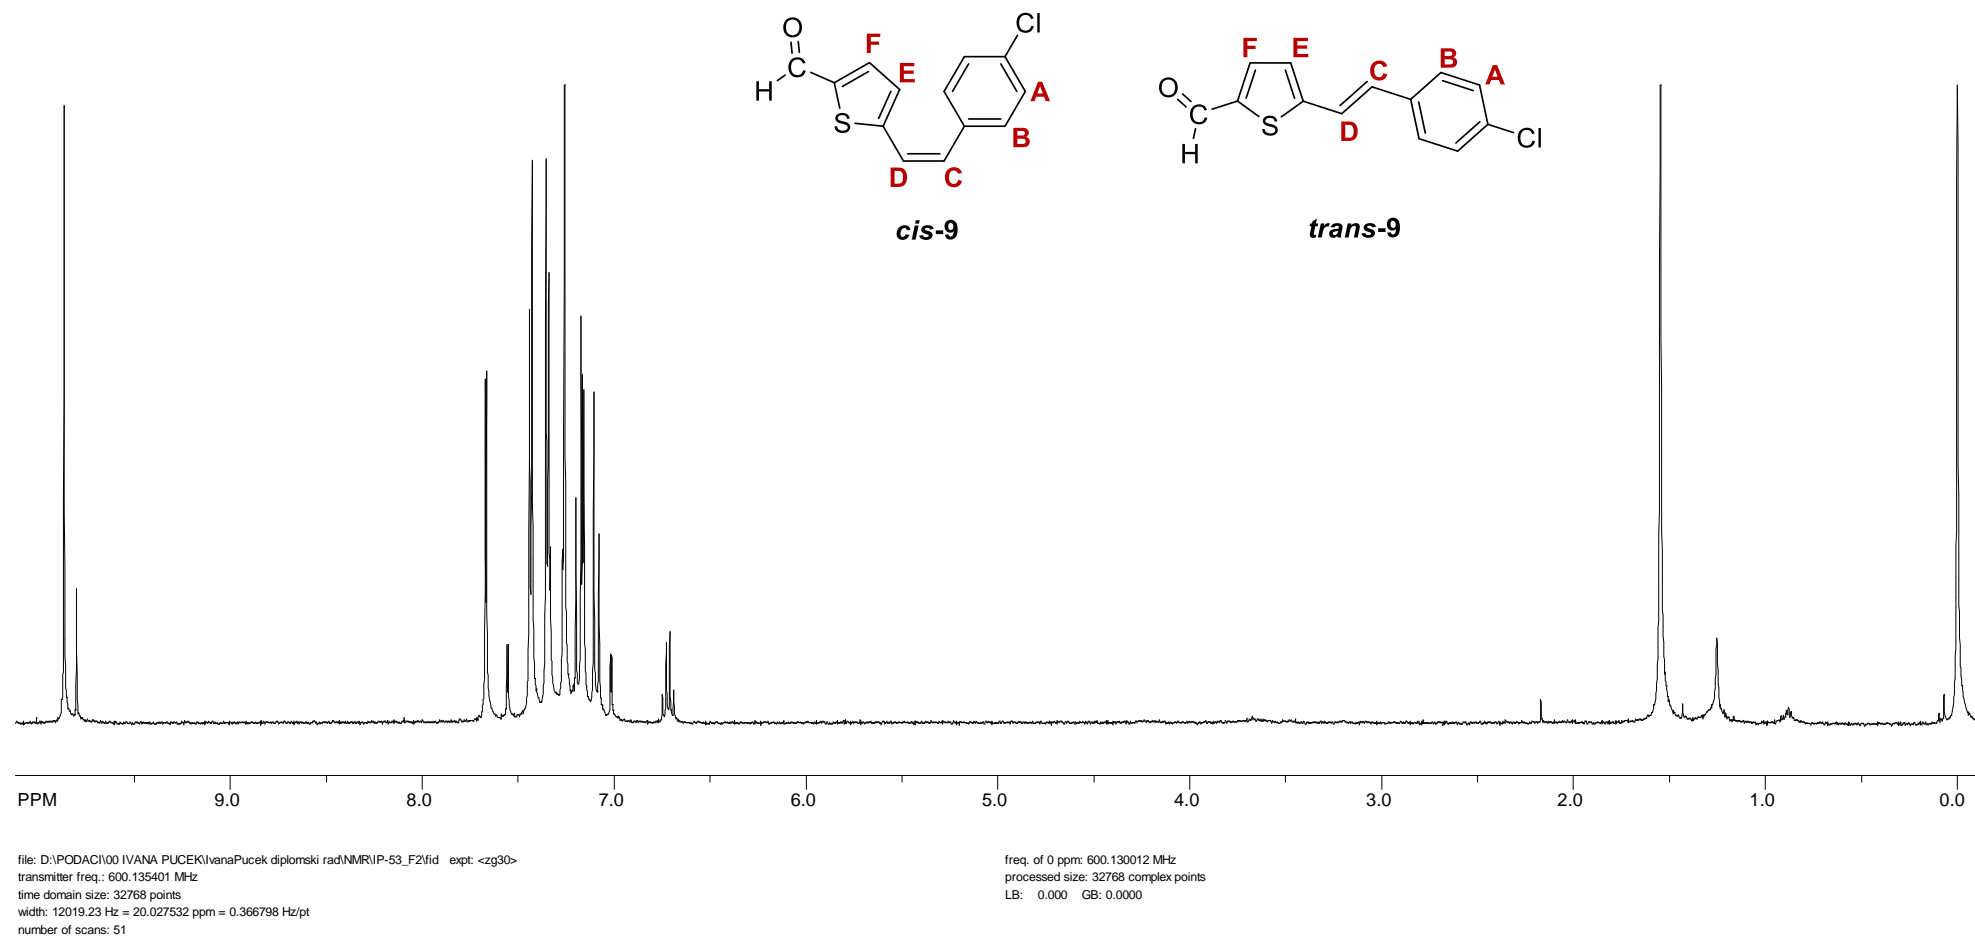

A part of the  $^1\text{H}$  NMR spectrum (600 MHz,  $\text{CDCl}_3$ ) of the mixture of geometrical isomers of 5-(4-chlorostyryl)thiophene-2-carbaldehyde (*cis*-9 and *trans*-9)

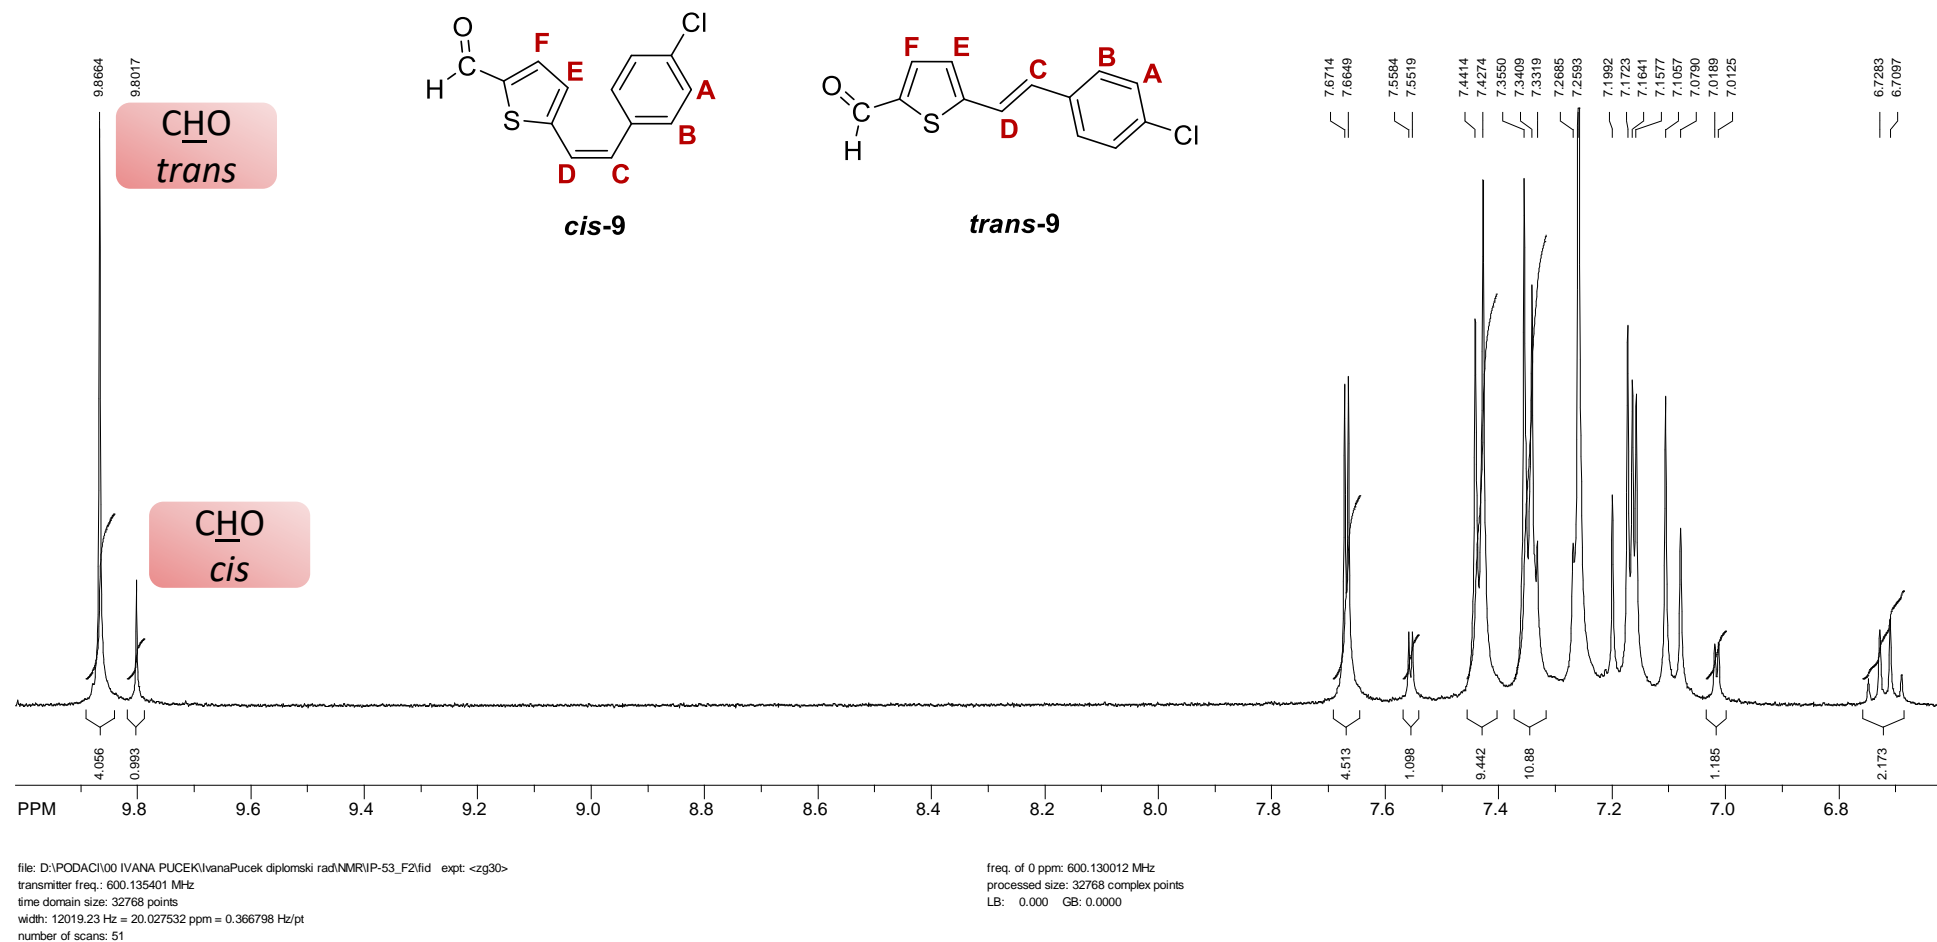

**Mass spectra and HRMS analysis of the mixture of geometrical isomers of 5-(4-chlorostyryl)thiophene-2-carbaldehyde (*cis*-9 and *trans*-9)**

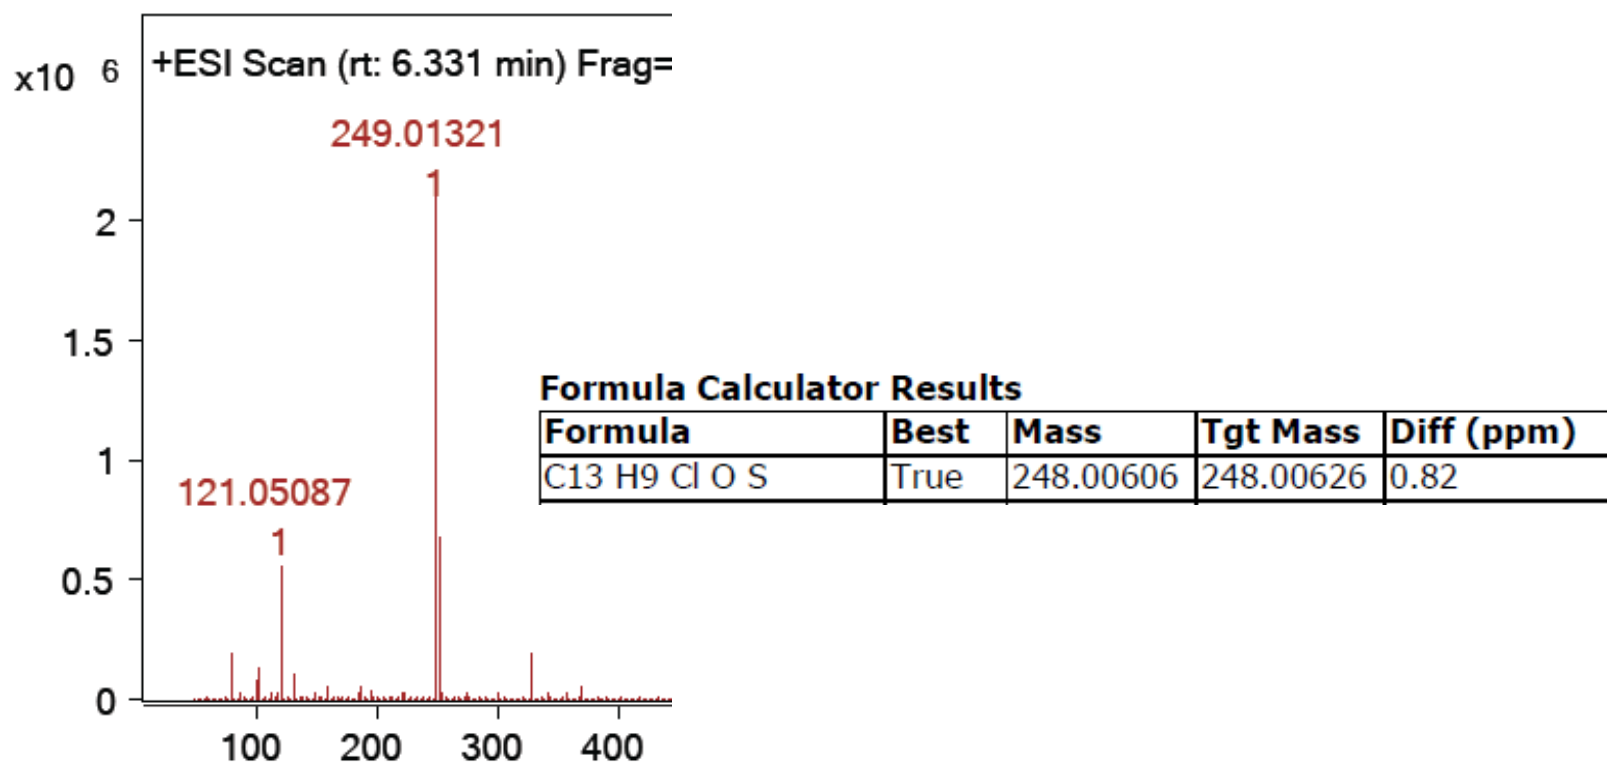



**<sup>1</sup>H NMR spectrum (600 MHz, CDCl<sub>3</sub>) of the mixture of geometrical isomers of 4-(2-(5-formylthiophen-2-yl)vinyl)benzonitrile (*cis*-10 and *trans*-10)**

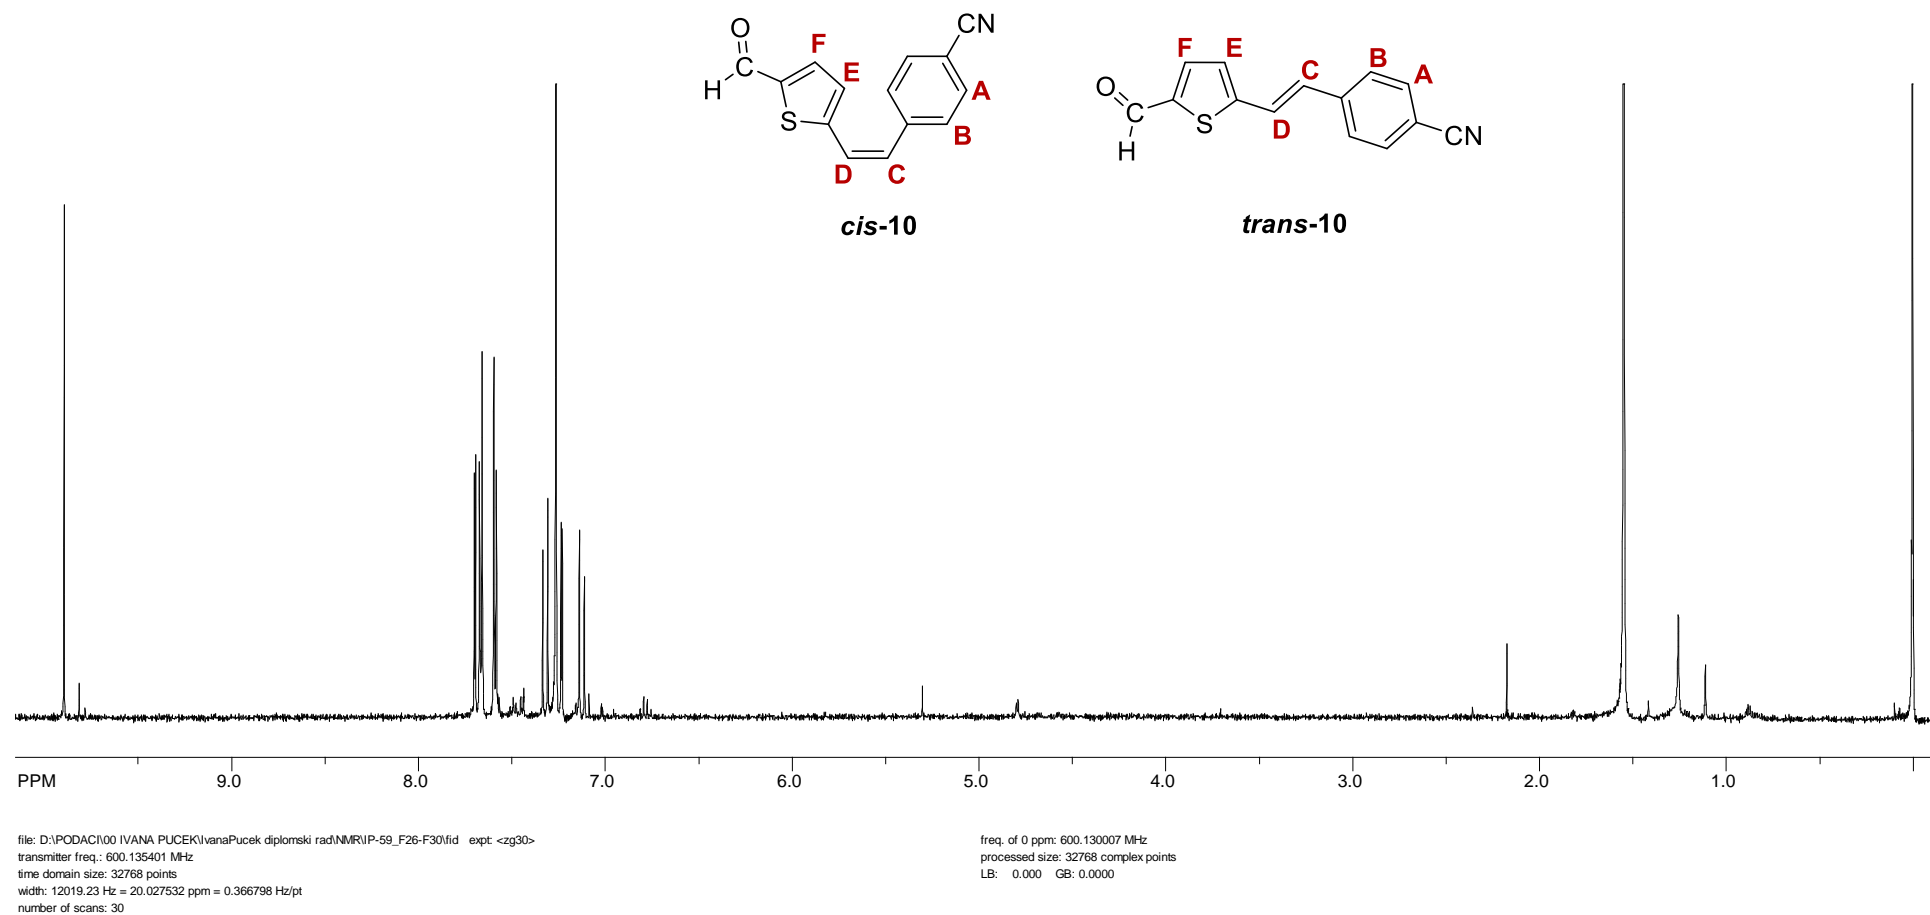

A part of the  $^1\text{H}$  NMR spectrum (600 MHz,  $\text{CDCl}_3$ ) of the mixture of geometrical isomers of 4-(2-(5-formylthiophen-2-yl)vinyl)benzonitrile (*cis*-10 and *trans*-10)

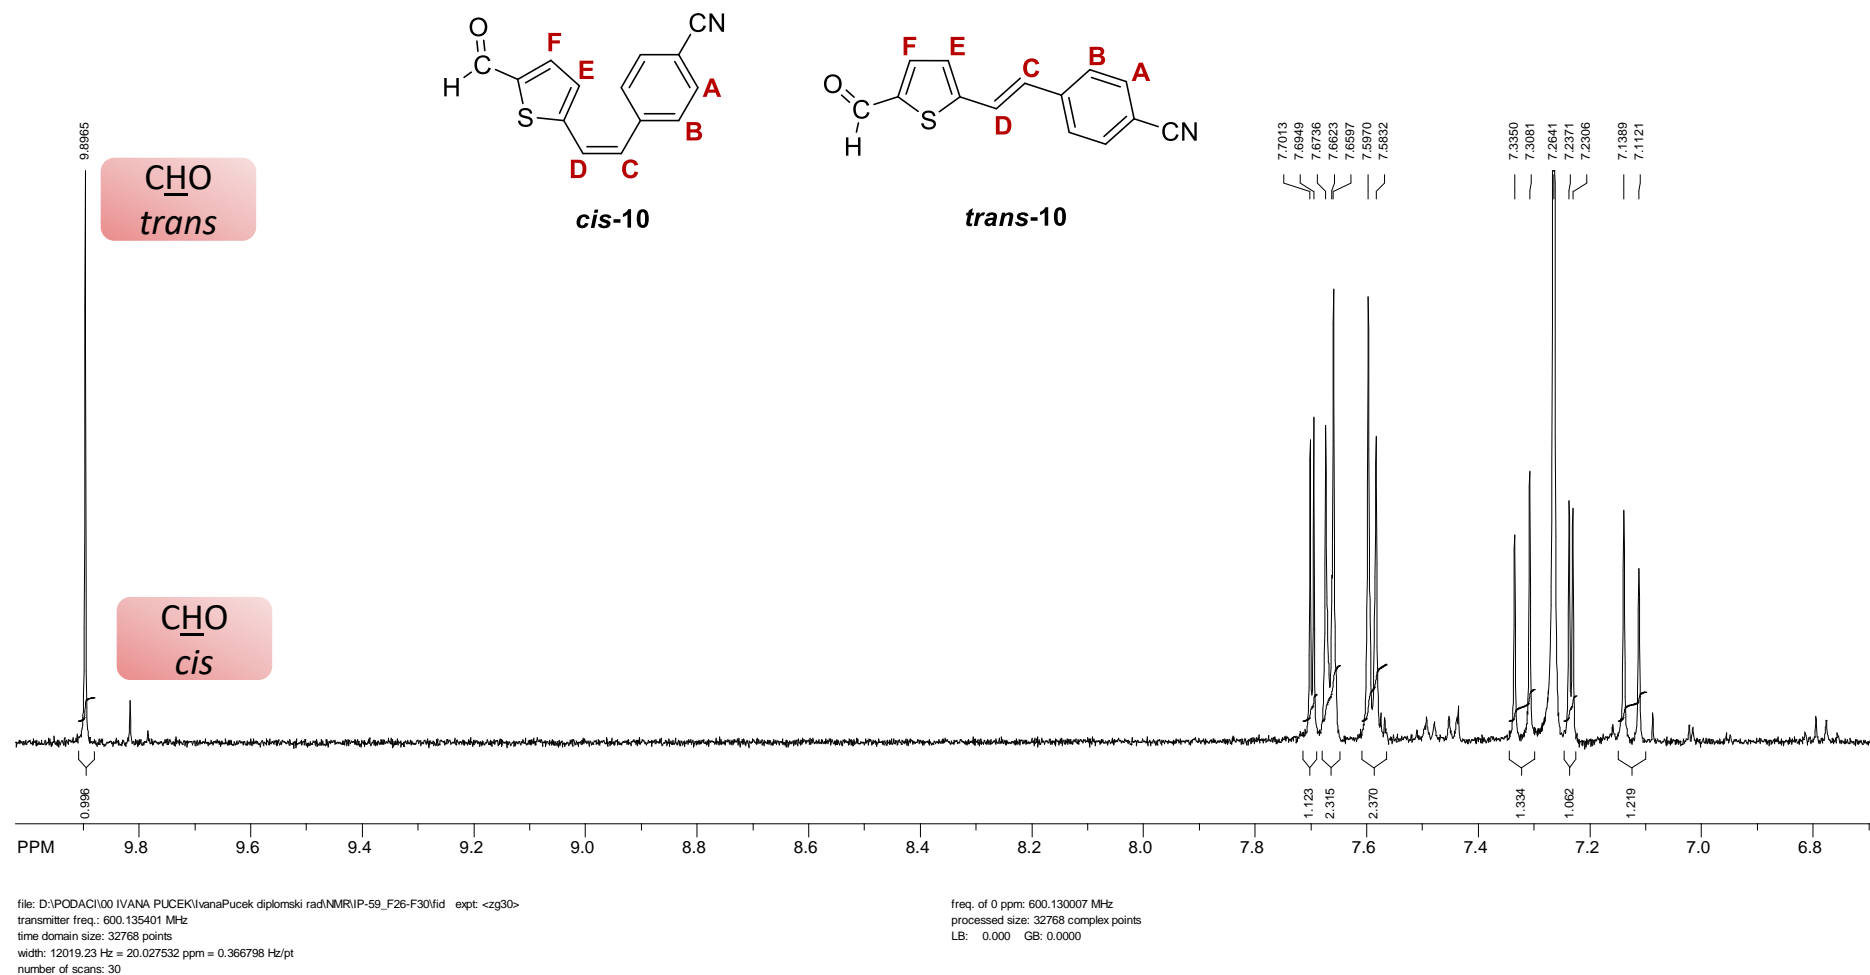

**$^1\text{H}$  NMR spectrum (600 MHz,  $\text{CDCl}_3$ ) of the mixture of geometrical isomers of 5-(4-nitrostyryl)thiophene-2-carbaldehyde (*cis*-11 and *trans*-11)**

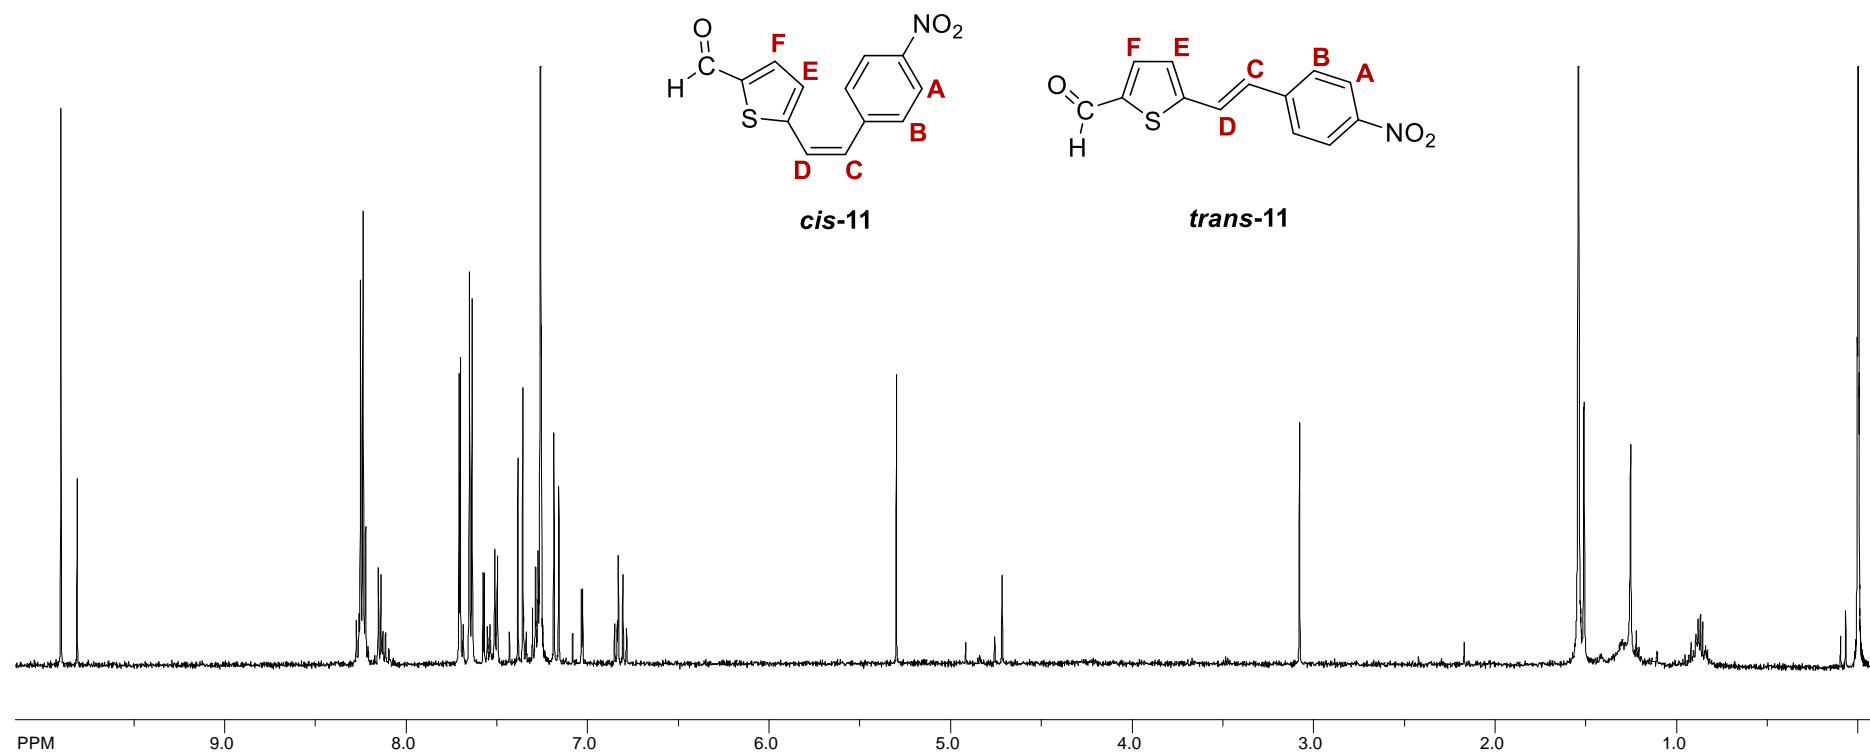

file: D:\PODACI\00 IVANA PUČEK\IvanaPucek diplomski rad\NMR\IP-64\_F7-F10\fid exp: <zg30>  
transmitter freq.: 600.135401 MHz  
time domain size: 32768 points  
width: 12019.23 Hz = 20.027532 ppm = 0.366798 Hz/pt  
number of scans: 77

freq. of 0 ppm: 600.130010 MHz  
processed size: 32768 complex points  
LB: 0.000 GB: 0.0000

A part of the  $^1\text{H}$  NMR spectrum (600 MHz,  $\text{CDCl}_3$ ) of the mixture of geometrical isomers of 5-(4-nitrostyryl)thiophene-2-carbaldehyde (*cis*-11 and *trans*-11)

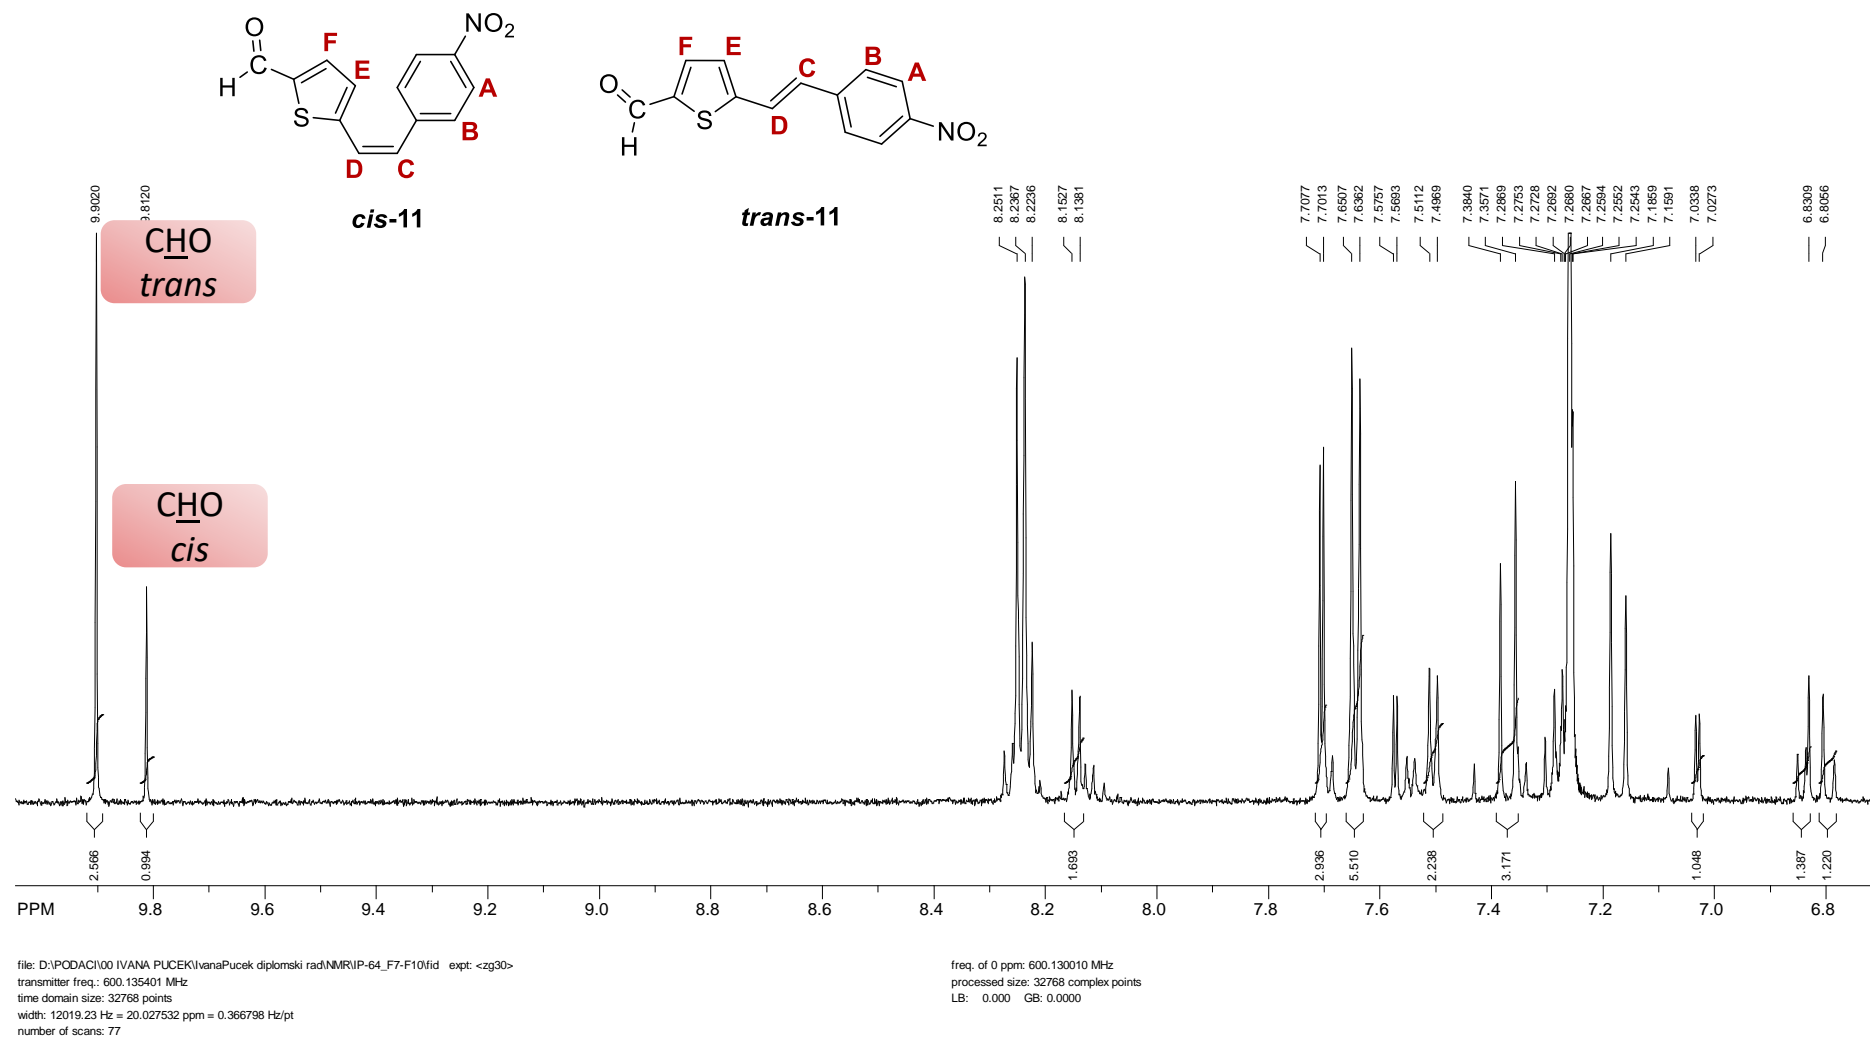

**Mass spectra and HRMS analysis of the mixture of geometrical isomers of 5-(4-nitrostyryl)thiophene-2-carbaldehyde (*cis*-11 and *trans*-11)**

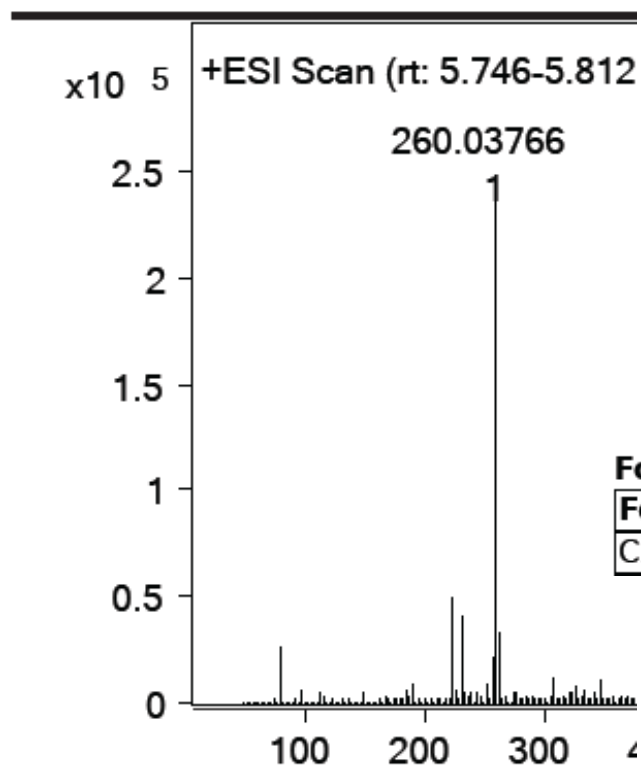

**Formula Calculator Results**

| Formula       | Best | Mass      | Tgt Mass  | Diff (ppm) |
|---------------|------|-----------|-----------|------------|
| C13 H9 N O3 S | True | 259.03056 | 259.03031 | -0.96      |

**$^1\text{H}$  NMR spectrum (600 MHz,  $\text{CDCl}_3$ ) of the mixture of geometrical isomers of 5-(4-(dimethylamino)styryl)thiophene-2-carbaldehyde (*cis*-12 and *trans*-12)**

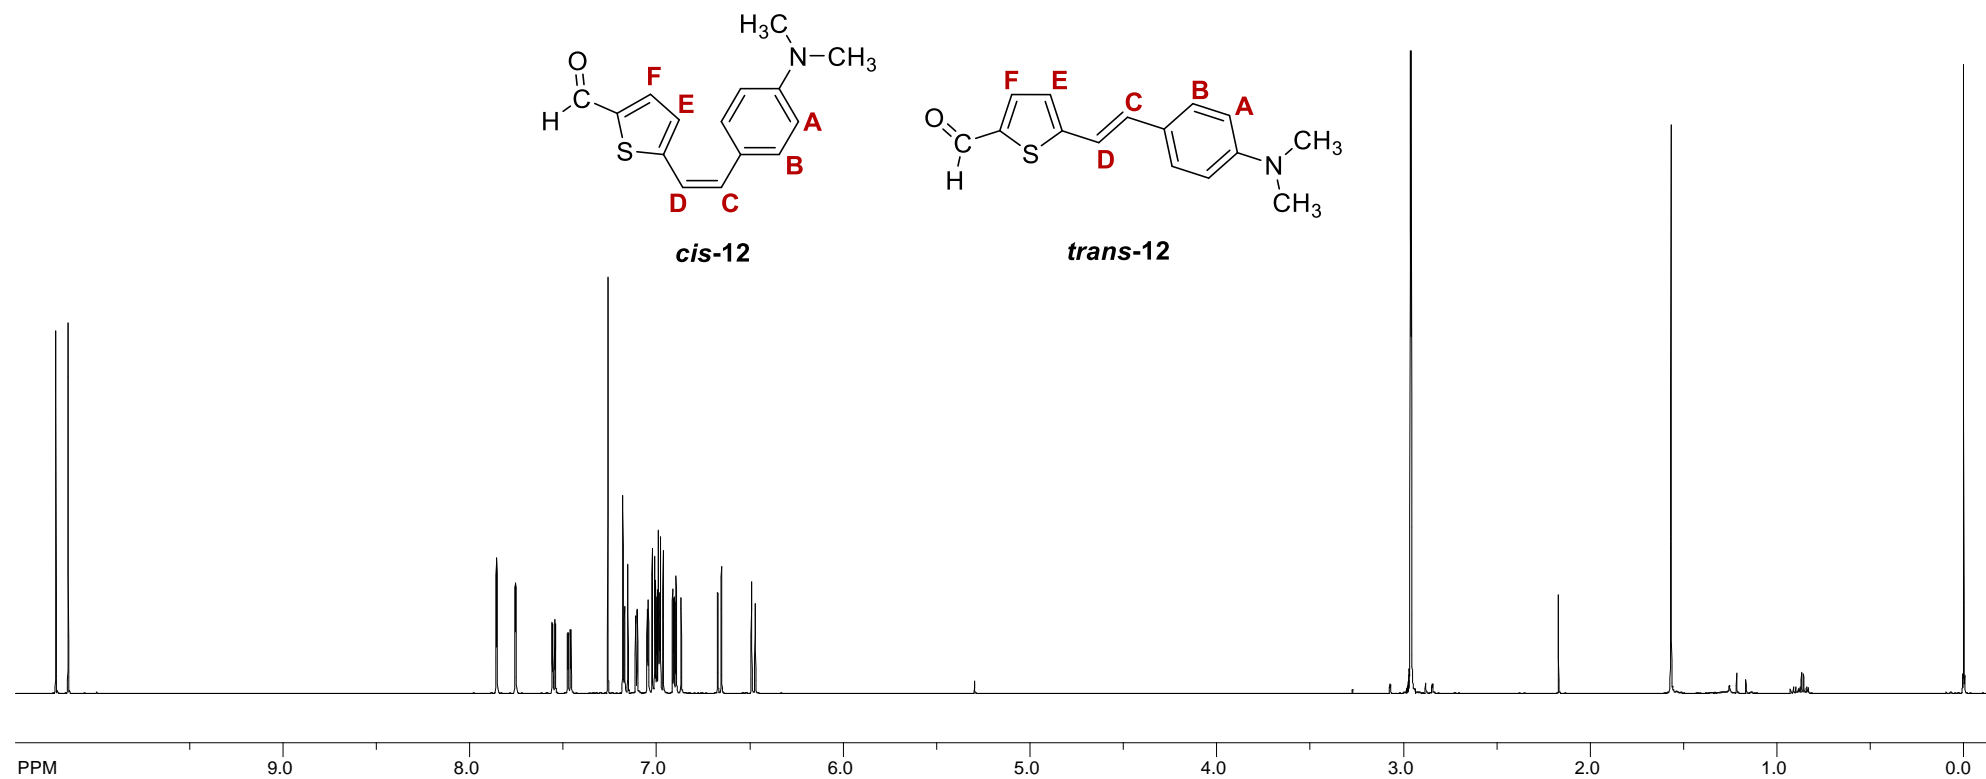

file: D:\PODACI\00 IVANA PUCEK\IvanaPucek diplomski rad\NMR\IP-63\_F9-F12\_F7-F17\fid exp: <zg30>  
transmitter freq.: 600.135401 MHz  
time domain size: 32768 points  
width: 12019.23 Hz = 20.027532 ppm = 0.366798 Hz/pt  
number of scans: 11

freq. of 0 ppm: 600.130010 MHz  
processed size: 32768 complex points  
LB: 0.000 GB: 0.0000

A part of the  $^1\text{H}$  NMR spectrum (600 MHz,  $\text{CDCl}_3$ ) of the mixture of geometrical isomers of 5-(4-(dimethylamino)styryl)thiophene-2-carbaldehyde (*cis*-12 and *trans*-12)

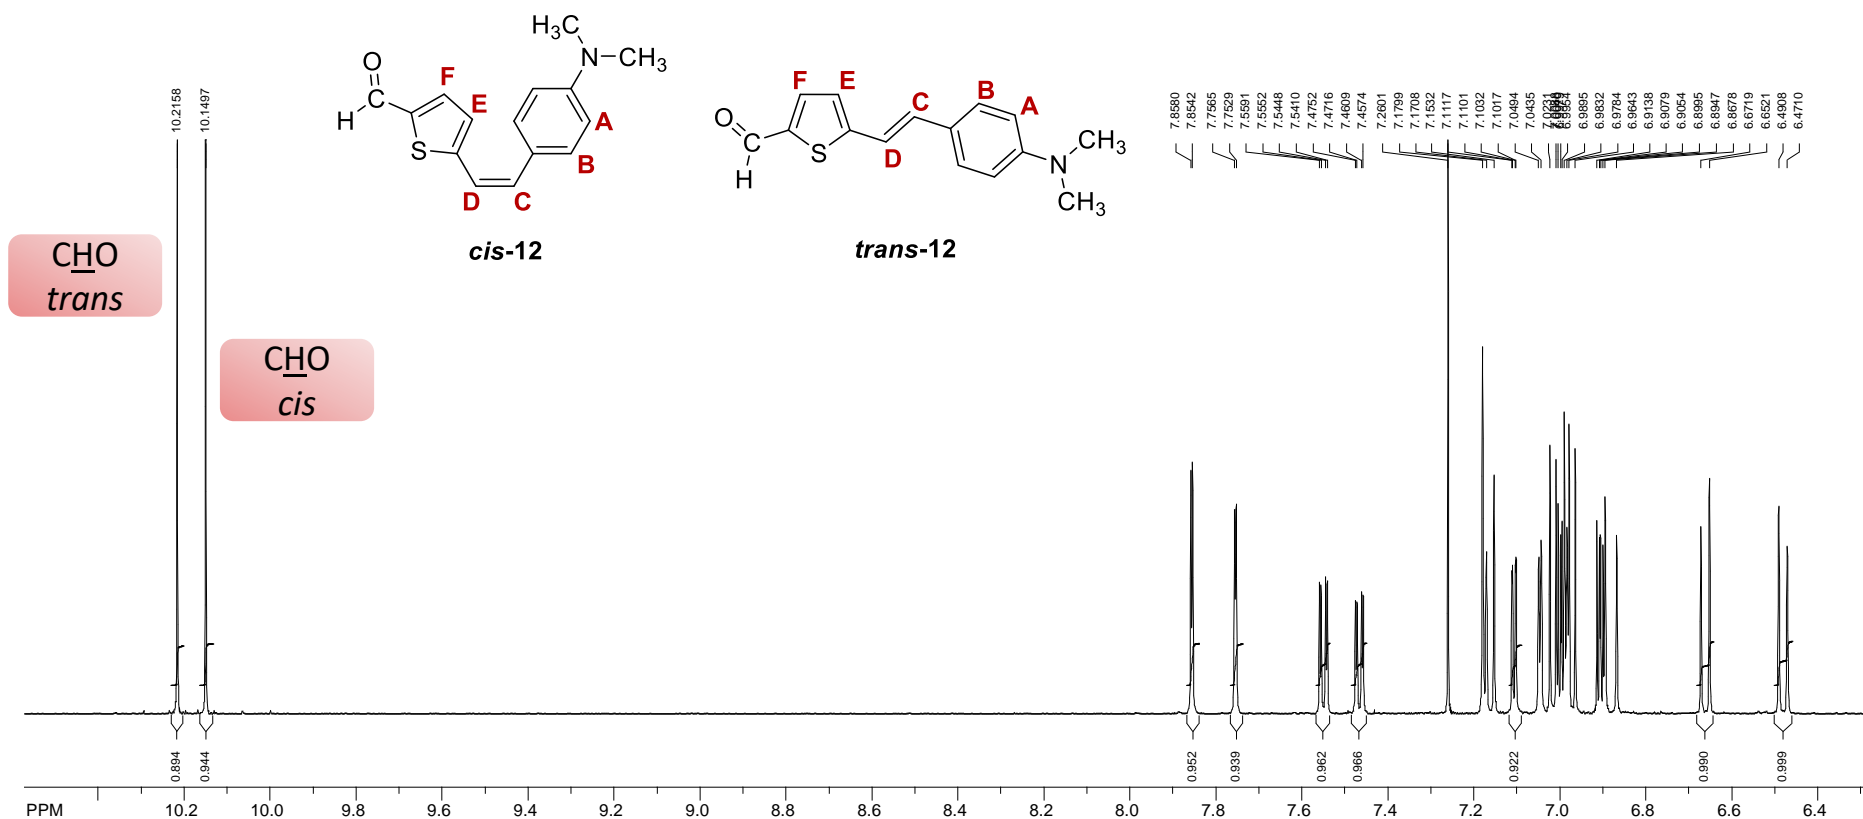

file: D:\PODACI\00 IVANA PUCEK\IvanaPucek diplomski rad\NMR\IP-63\_F9-F12\_F7-F17\fid exp: <zg30>  
transmitter freq.: 600.135401 MHz  
time domain size: 32768 points  
width: 12019.23 Hz = 20.027532 ppm = 0.366798 Hz/pt  
number of scans: 11

freq. of 0 ppm: 600.130010 MHz  
processed size: 32768 complex points  
LB: 0.000 GB: 0.0000

## Mass spectra and HRMS analysis of the mixture of geometrical isomers of 5-(4-(dimethylamino)styryl)thiophene-2-carbaldehyde (*cis*-12 and *trans*-12)

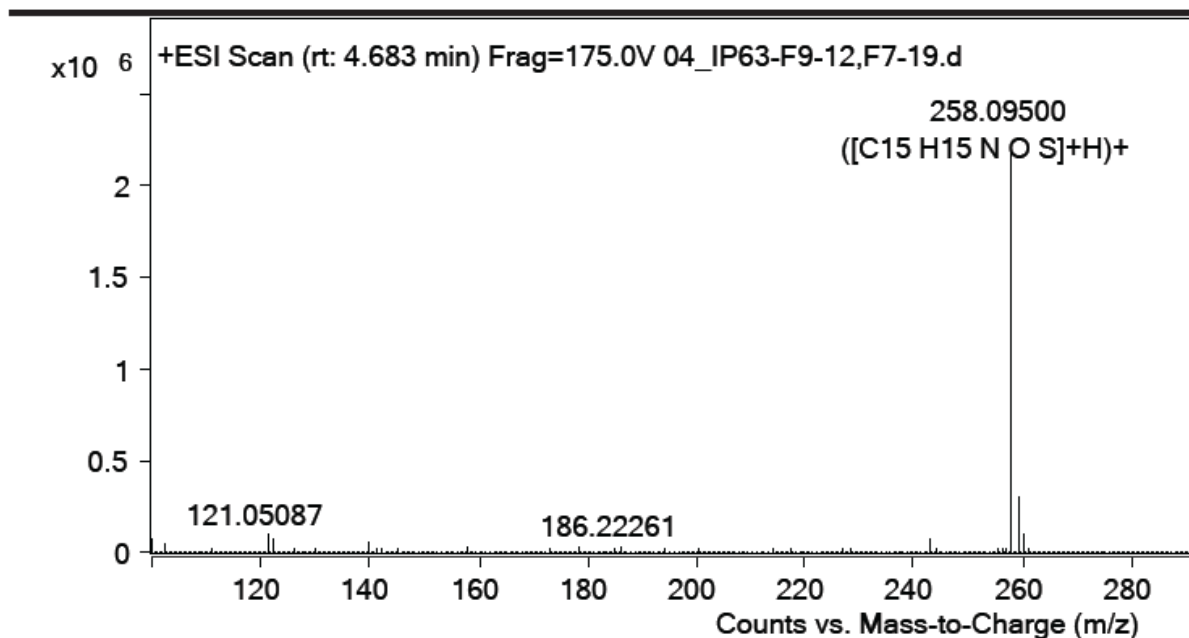

### Formula Calculator Results

| Formula       | Best | Mass      | Tgt Mass  | Diff (ppm) |
|---------------|------|-----------|-----------|------------|
| C15 H15 N O S | True | 257.08787 | 257.08743 | -1.67      |



**$^1\text{H}$  NMR spectrum (600 MHz,  $\text{CDCl}_3$ ) of *trans,anti*-5-(4-methylstyryl)thiophene-2-carbaldehyde oxime (*trans,anti*-13)**

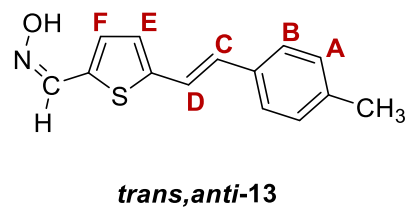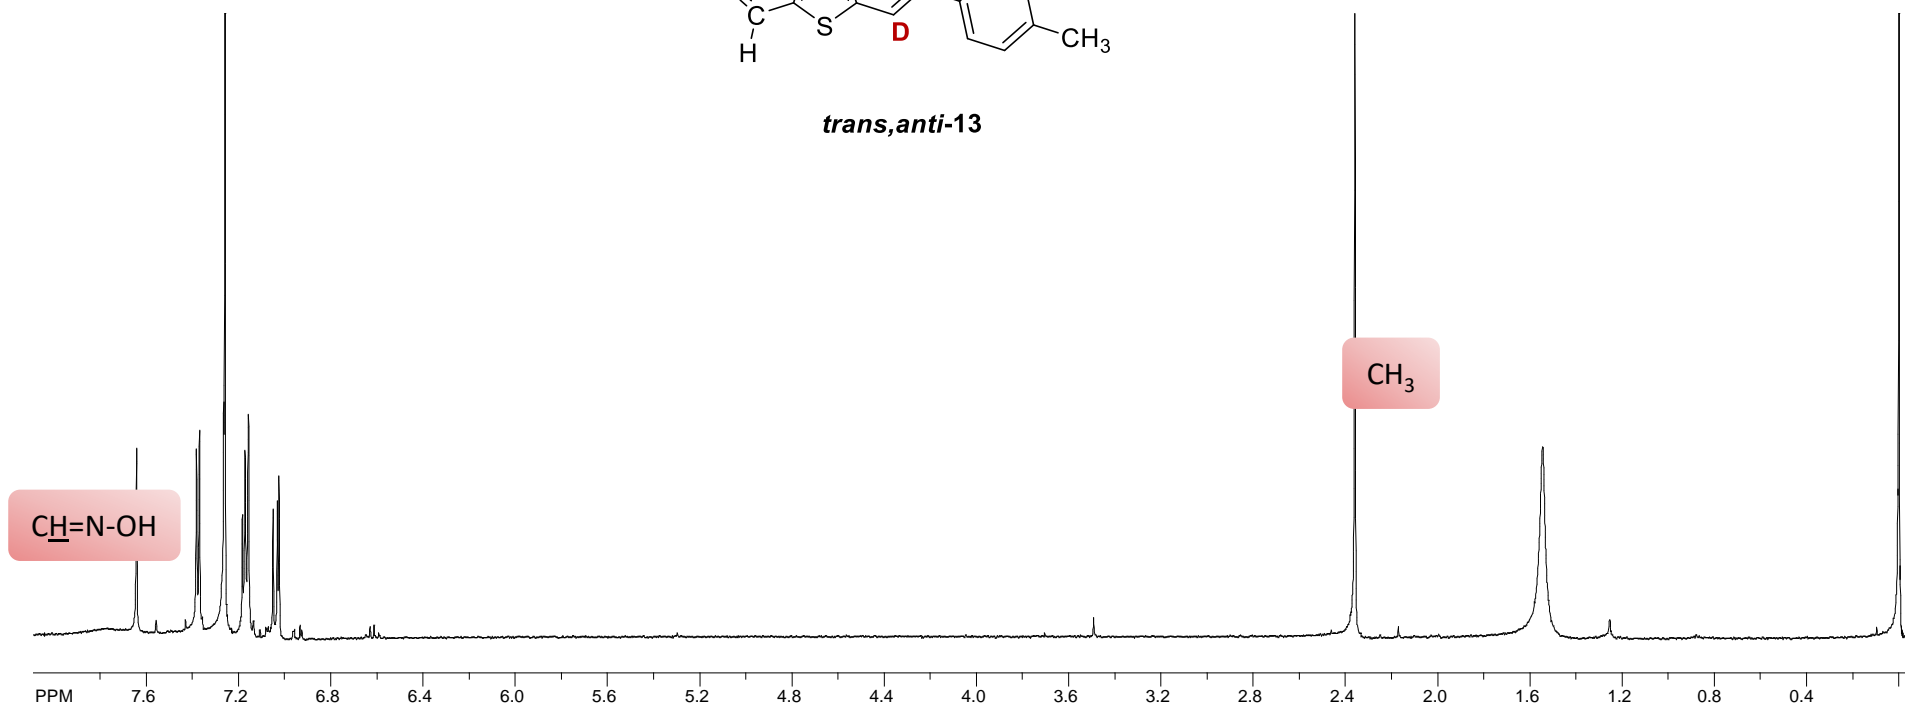

file: D:\PODACI\001\IVANA PUCEK\IvanaPucek diplomski rad\NMR\IP-51\_F8-F18\_F54-F55\fid exp: <zg30>  
transmitter freq.: 600.135401 MHz  
time domain size: 32768 points  
width: 12019.23 Hz = 20.027532 ppm = 0.366798 Hz/pt  
number of scans: 54

freq. of 0 ppm: 600.130012 MHz  
processed size: 32768 complex points  
LB: 0.000 GB: 0.0000

A part of the  $^1\text{H}$  NMR spectrum (600 MHz,  $\text{CDCl}_3$ ) of *trans,anti*-5-(4-methylstyryl)thiophene-2-carbaldehyde oxime (*trans,anti*-13)

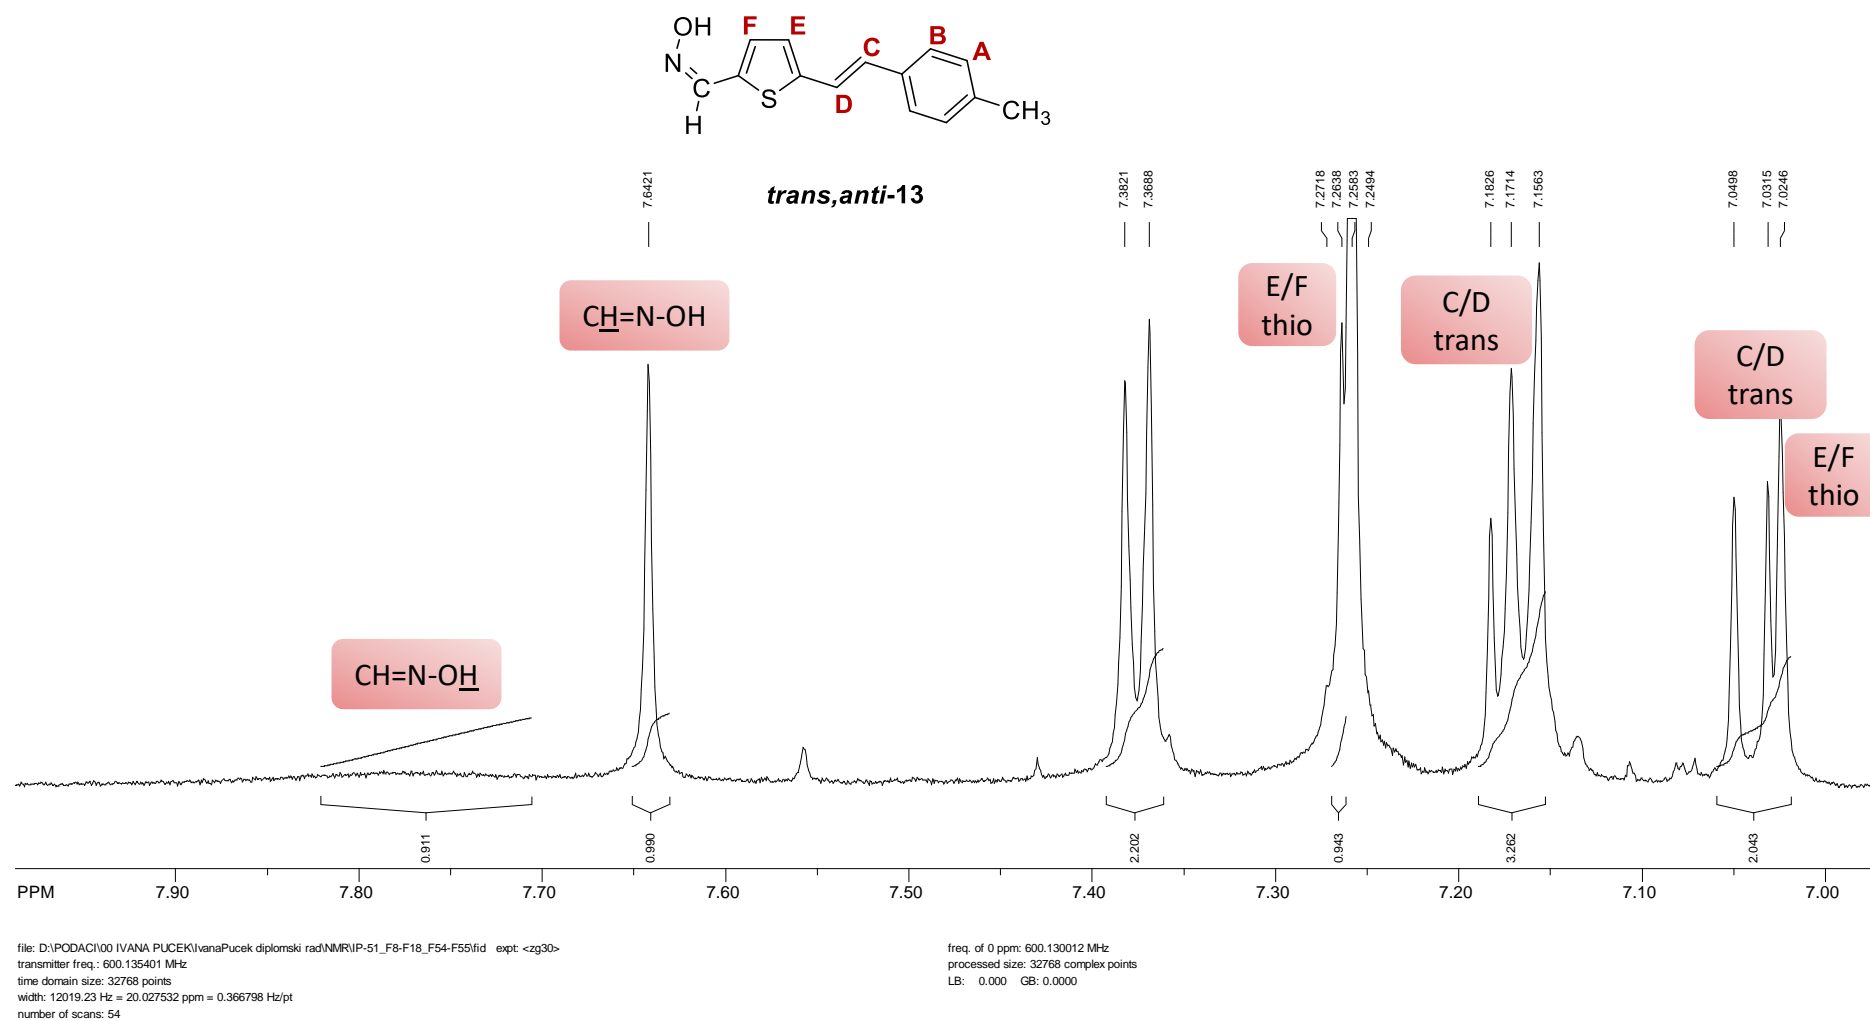

<sup>13</sup>C NMR spectrum (150 MHz, CDCl<sub>3</sub>) of *trans,anti*-5-(4-methylstyryl)thiophene-2-carbaldehyde oxime (*trans,anti*-13)

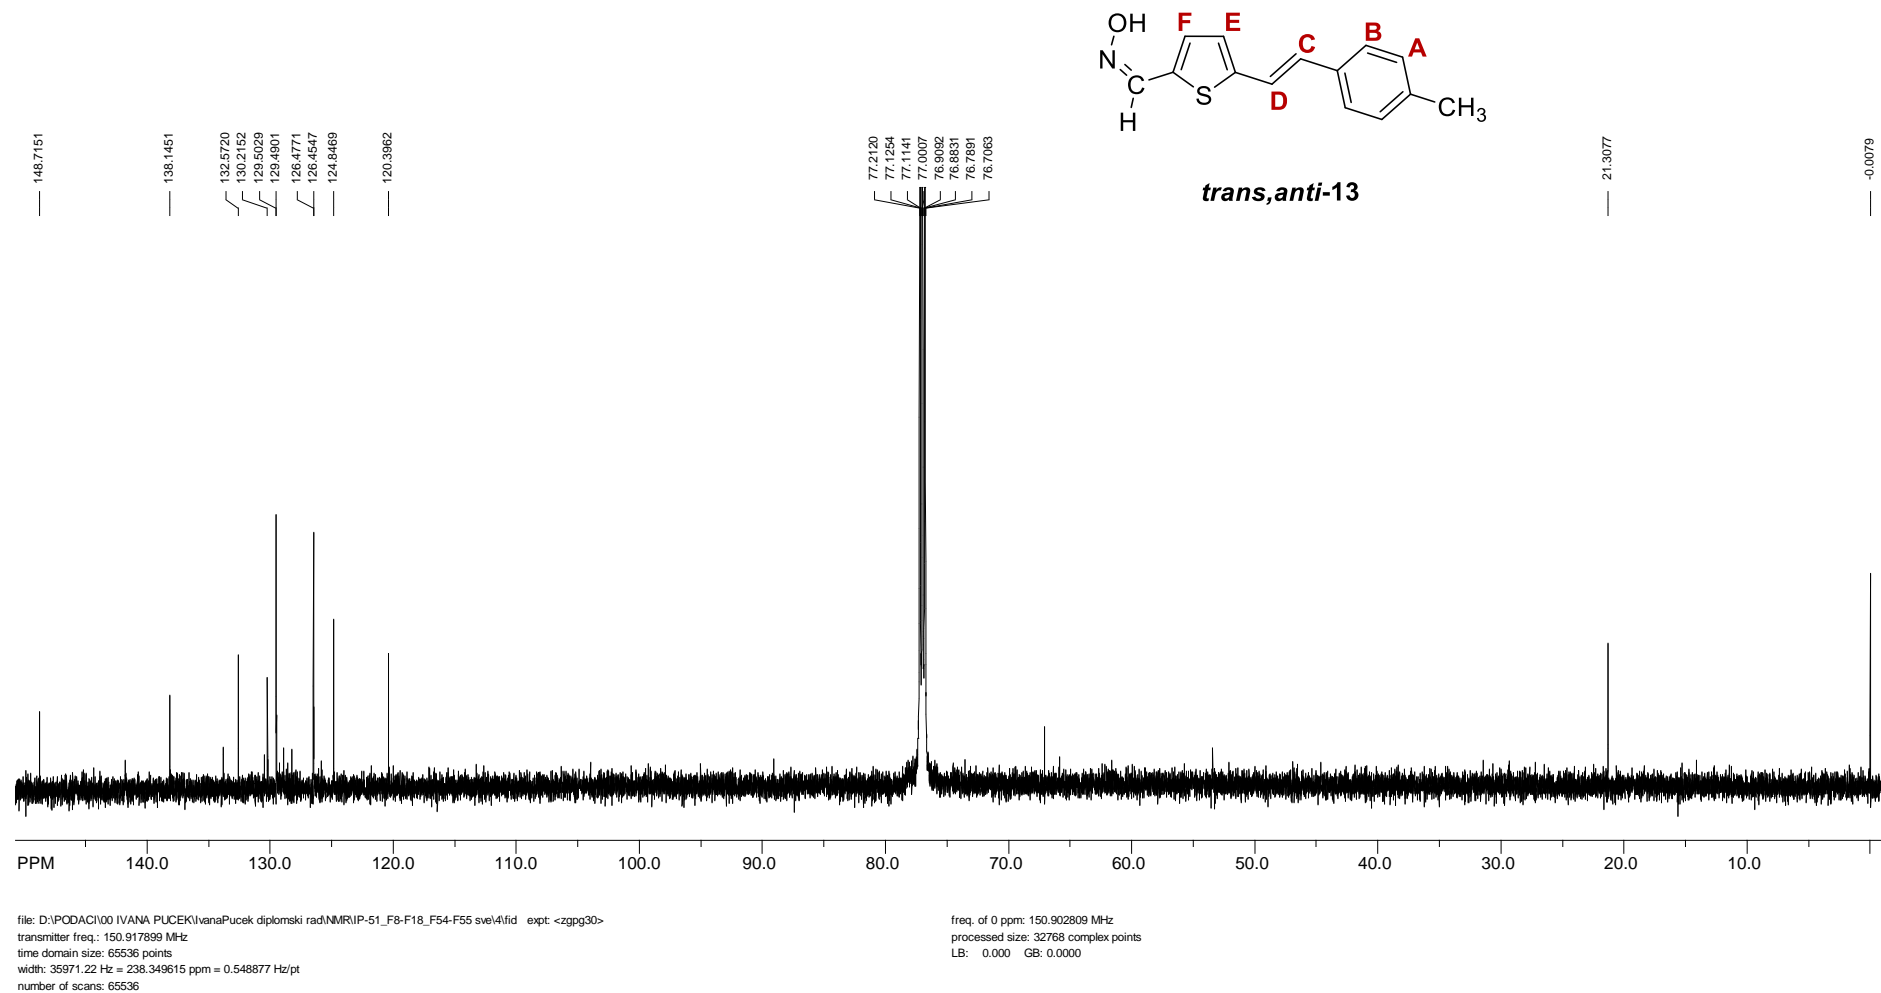

## COSY spectrum of *trans,anti*-5-(4-methylstyryl)thiophene-2-carbaldehyde oxime (*trans,anti*-13)

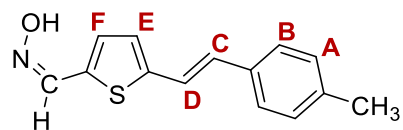

*trans,anti*-13

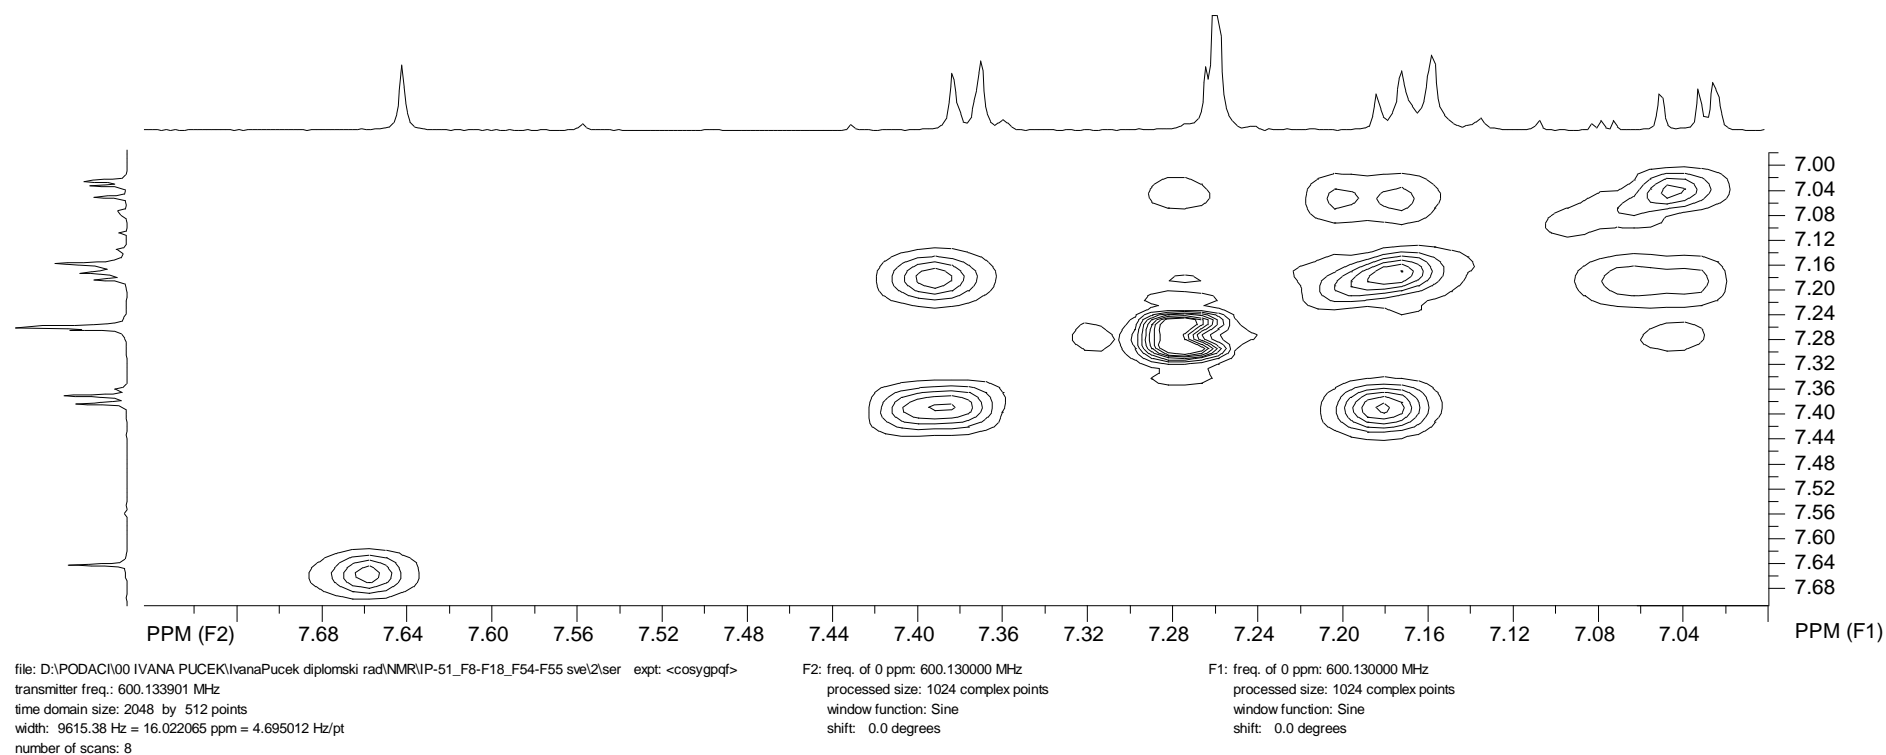

## HSQC spectrum of *trans,anti*-5-(4-methylstyryl)thiophene-2-carbaldehyde oxime (*trans,anti*-13)

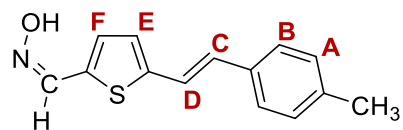

*trans,anti*-13

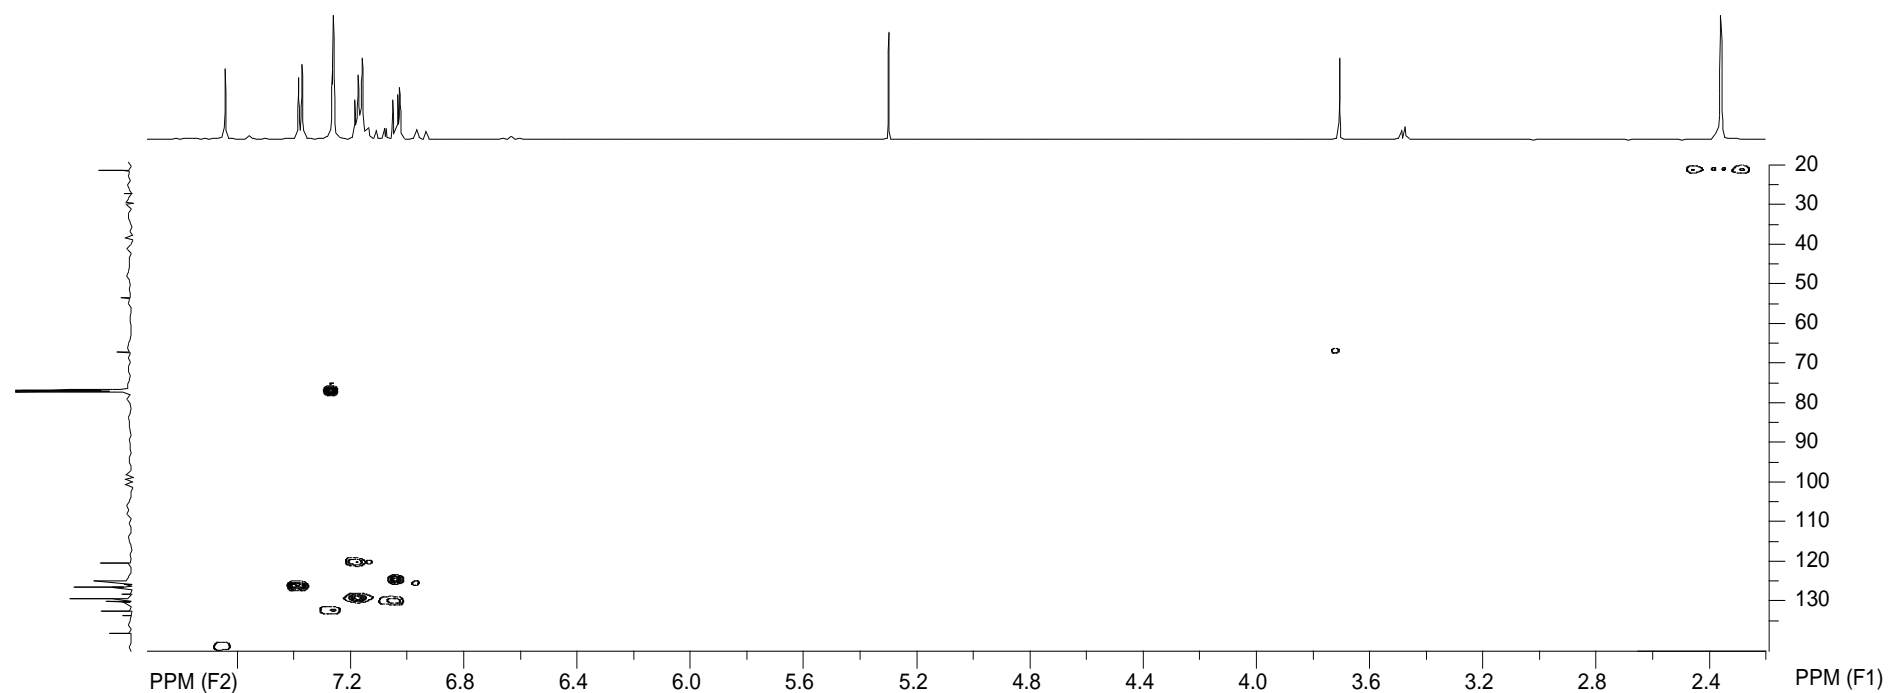

file: D:\PODACI\00 IVANA PUCEK\IvanaPucek diplomski rad\NMR\IP-51\_F8-F18\_F54-F55 sve\3\ser exp: <inv4gpd>  
 transmitter freq.: 600.133901 MHz  
 time domain size: 2048 by 256 points  
 width: 9615.38 Hz = 16.022065 ppm = 4.695012 Hz/pt  
 number of scans: 128

F2: freq. of 0 ppm: 600.130000 MHz  
 processed size: 1024 complex points  
 window function: Sine  
 shift: 0.0 degrees

F1: freq. of 0 ppm: 150.902809 MHz  
 processed size: 1024 complex points  
 window function: Sine  
 shift: 0.0 degrees

**<sup>1</sup>H NMR spectrum (600 MHz, CDCl<sub>3</sub>) of *trans,syn*-5-(4-methylstyryl)thiophene-2-carbaldehyde oxime (*trans,syn*-13)**

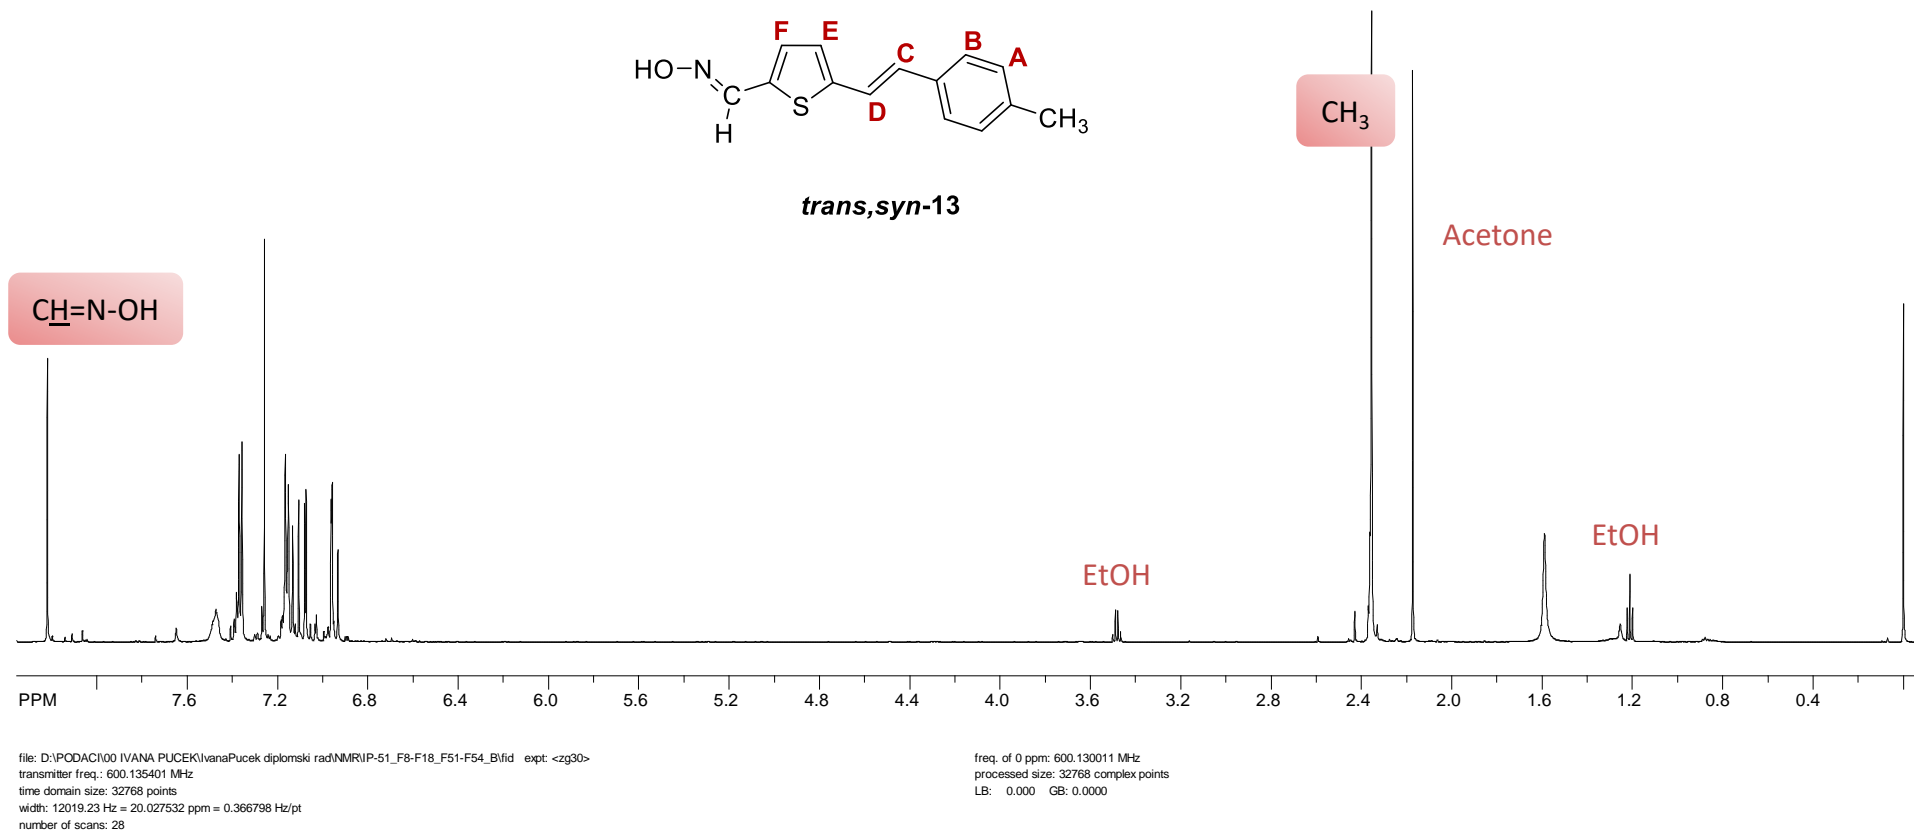

A part of the  $^1\text{H}$  NMR spectrum (600 MHz,  $\text{CDCl}_3$ ) of *trans,syn*-5-(4-methylstyryl)thiophene-2-carbaldehyde oxime (*trans,syn*-13)

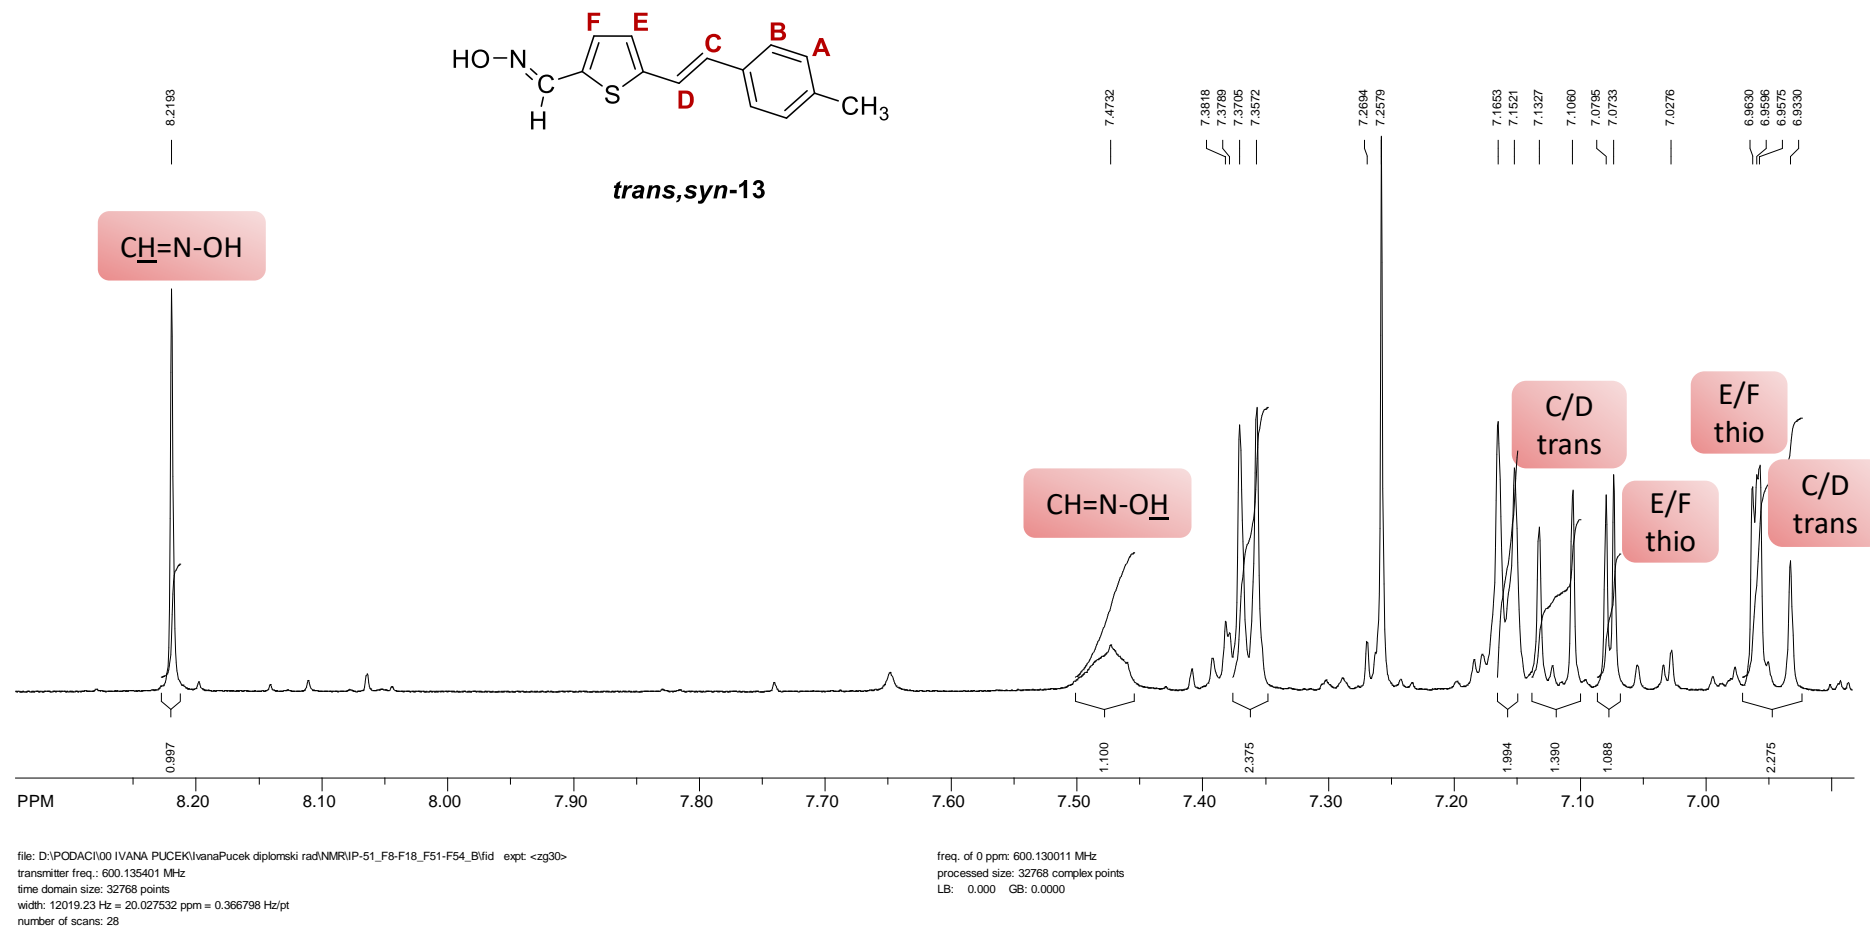

**$^{13}\text{C}$  NMR spectrum (150 MHz,  $\text{CDCl}_3$ ) of *trans,syn*-5-(4-methylstyryl)thiophene-2-carbaldehyde oxime (*trans,syn*-13)**

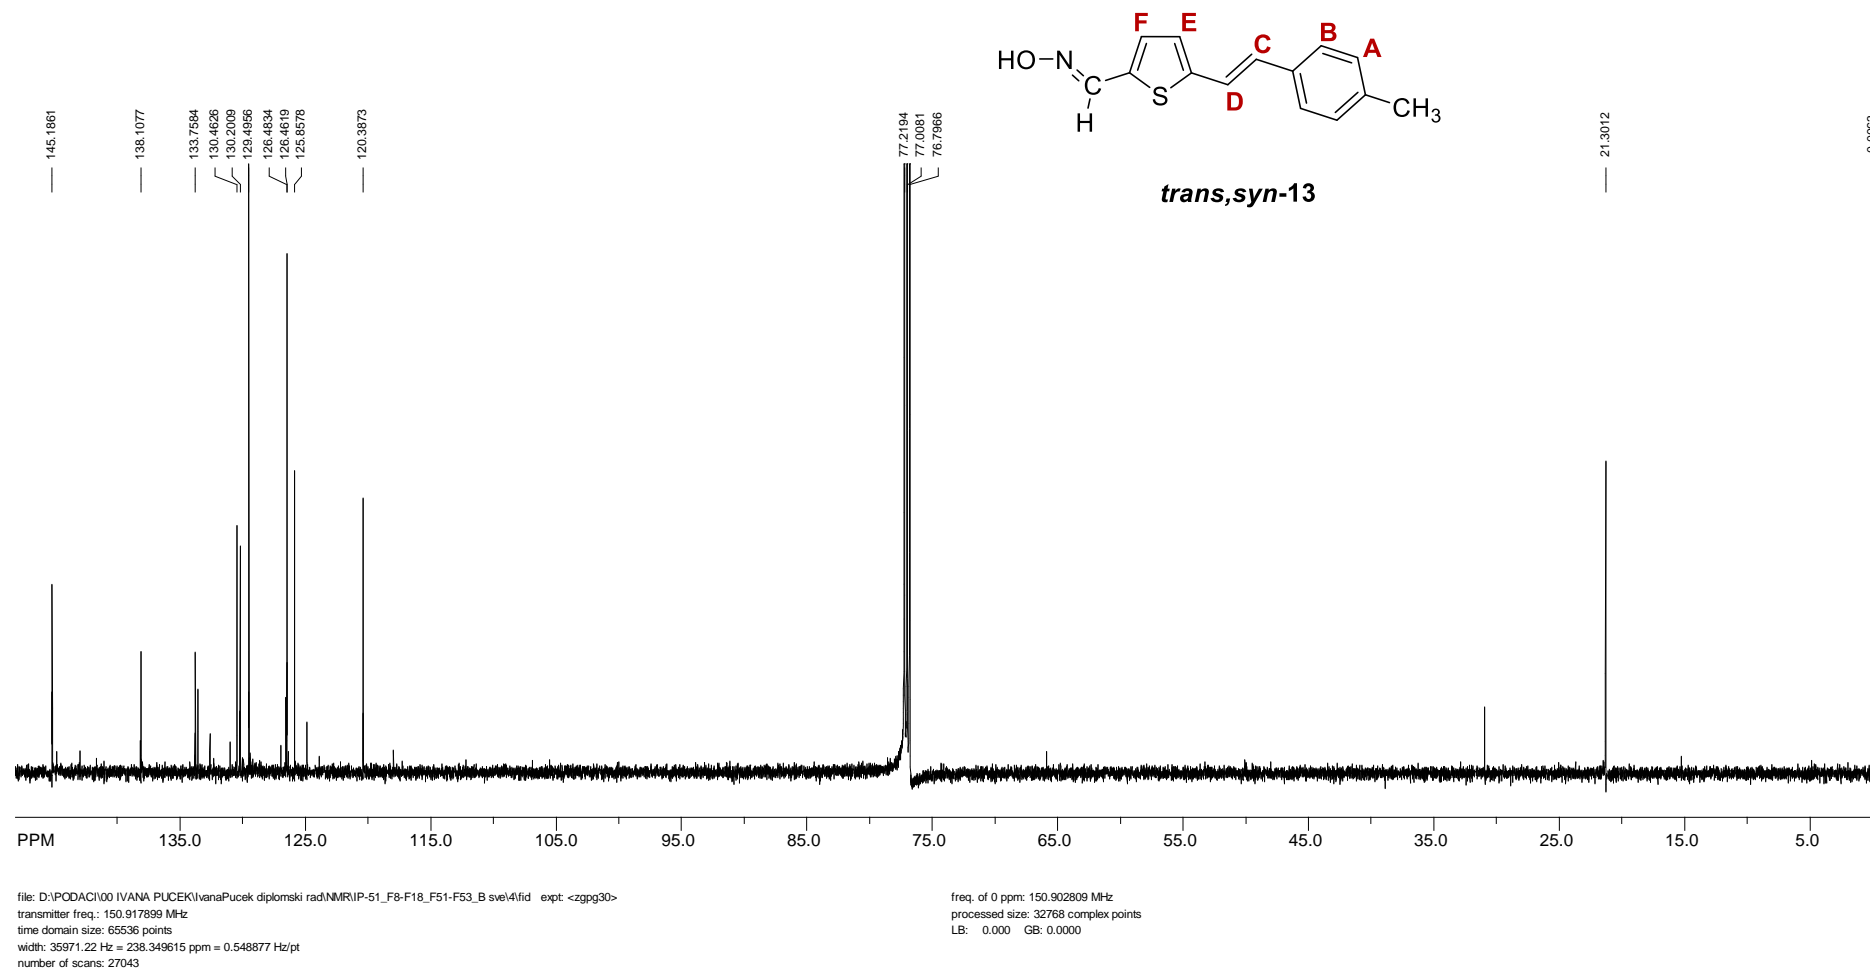



## COSY spectrum of *trans,syn*-5-(4-methylstyryl)thiophene-2-carbaldehyde oxime (*trans,syn*-13)

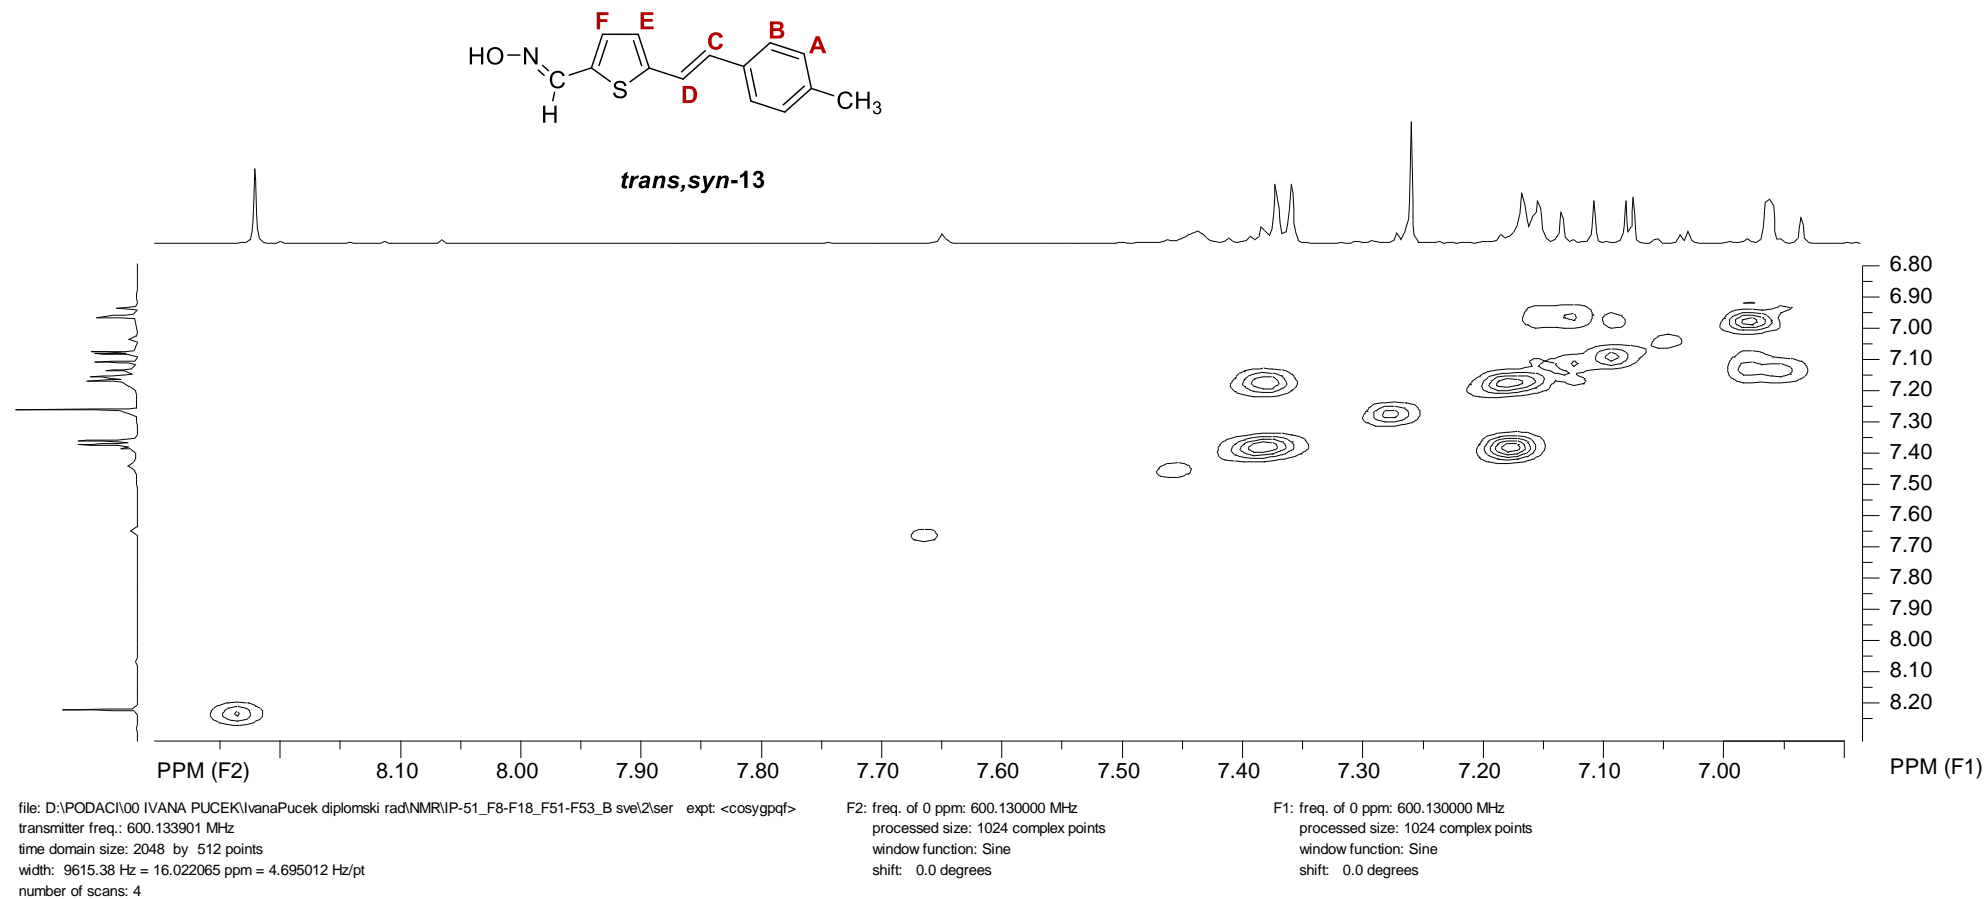

## HSQC spectrum of *trans,syn*-5-(4-methylstyryl)thiophene-2-carbaldehyde oxime (*trans,syn*-13)

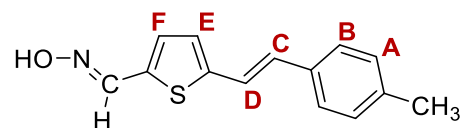

*trans,syn*-13

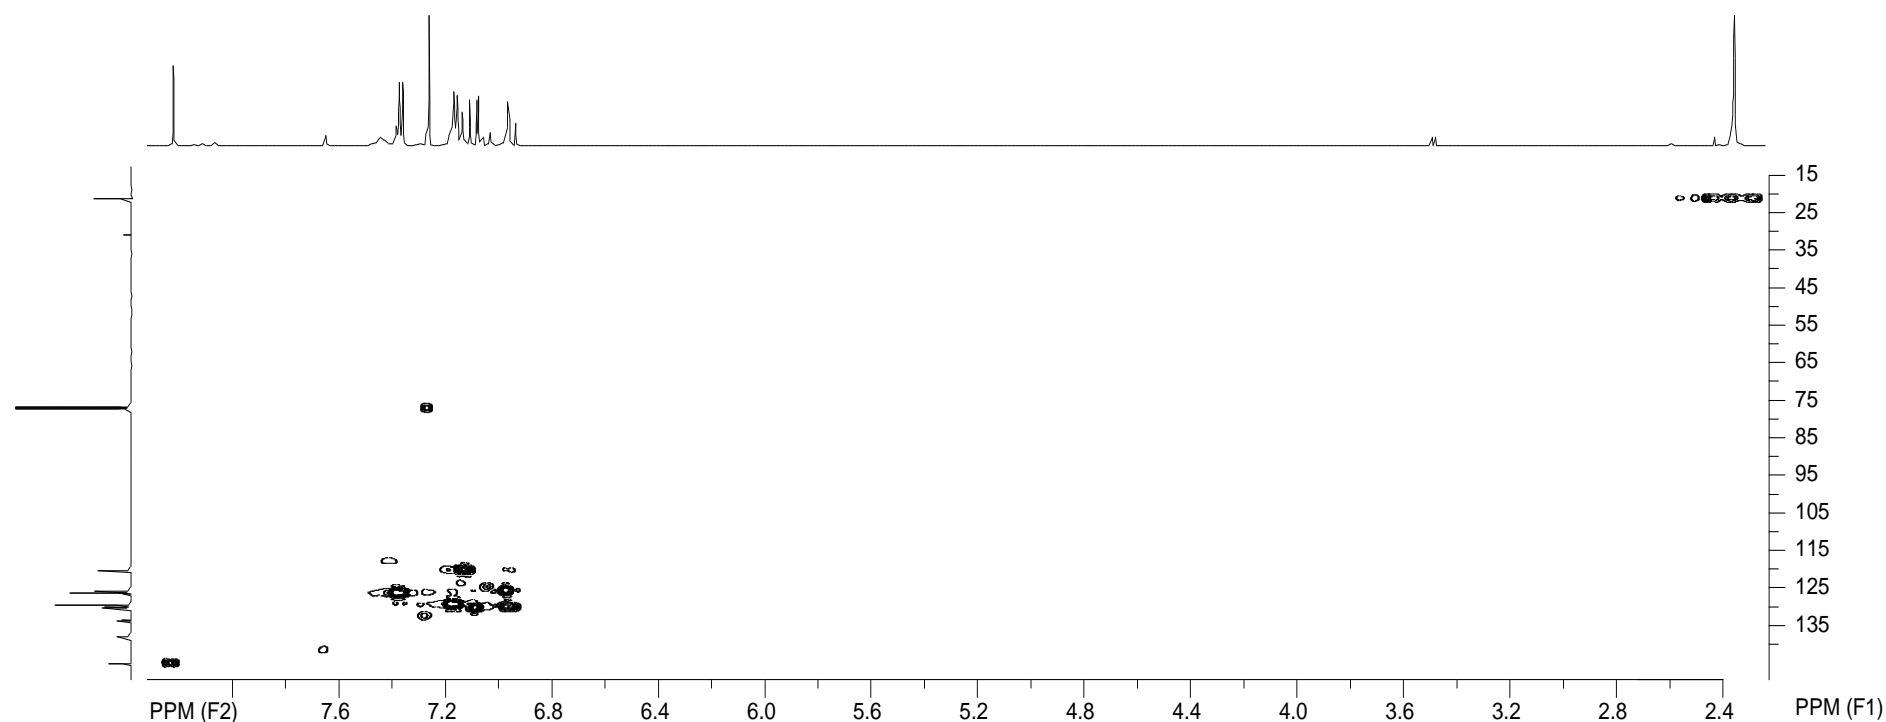

file: D:\PODACI\00 IVANA PUCEK\IvanaPucek diplomski rad\NMR\IP-51\_F8-F18\_F51-F53\_B sve\3\ser exp: <inv4gpg>  
 transmitter freq.: 600.133901 MHz  
 time domain size: 2048 by 256 points  
 width: 9615.38 Hz = 16.022065 ppm = 4.695012 Hz/pt  
 number of scans: 64

F2: freq. of 0 ppm: 600.130000 MHz  
 processed size: 1024 complex points  
 window function: Sine  
 shift: 0.0 degrees

F1: freq. of 0 ppm: 150.902809 MHz  
 processed size: 1024 complex points  
 window function: Sine  
 shift: 0.0 degrees

**<sup>1</sup>H NMR spectrum (600 MHz, CDCl<sub>3</sub>) of *cis,syn*-5-(4-methylstyryl)thiophene-2-carbaldehyde oxime (*cis,syn*-13) with traces of *trans,syn*-13**

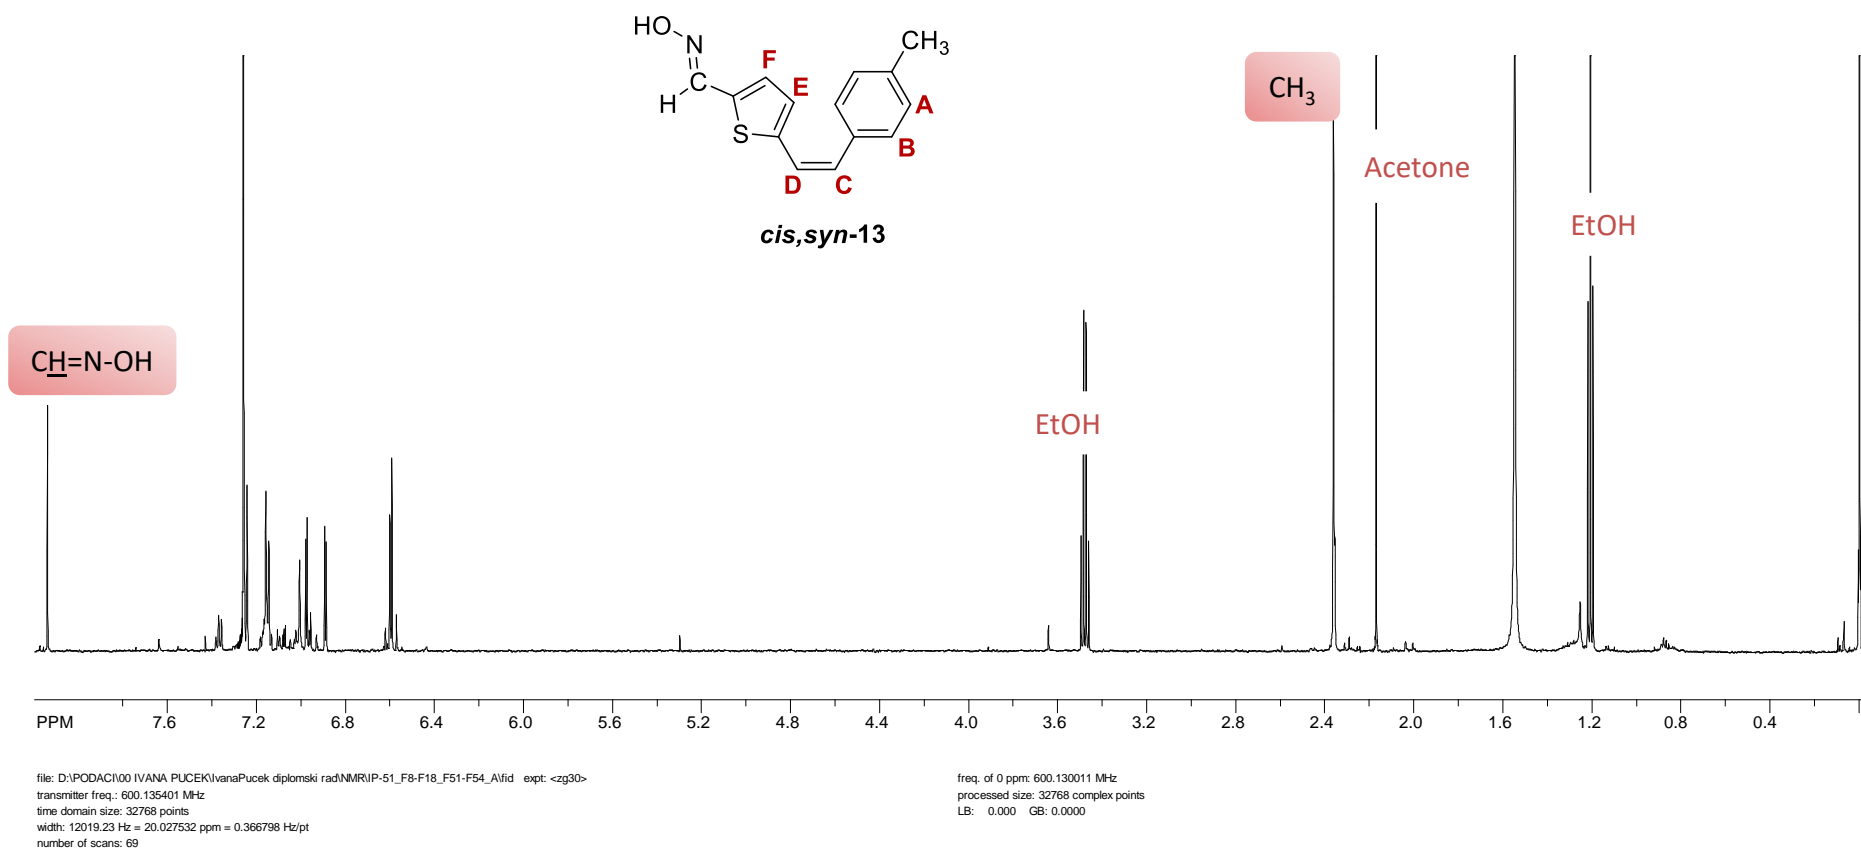

A part of the  $^1\text{H}$  NMR spectrum (600 MHz,  $\text{CDCl}_3$ ) of *cis,syn*-5-(4-methylstyryl)thiophene-2-carbaldehyde oxime (*cis,syn*-13) with traces of *trans,syn*-13

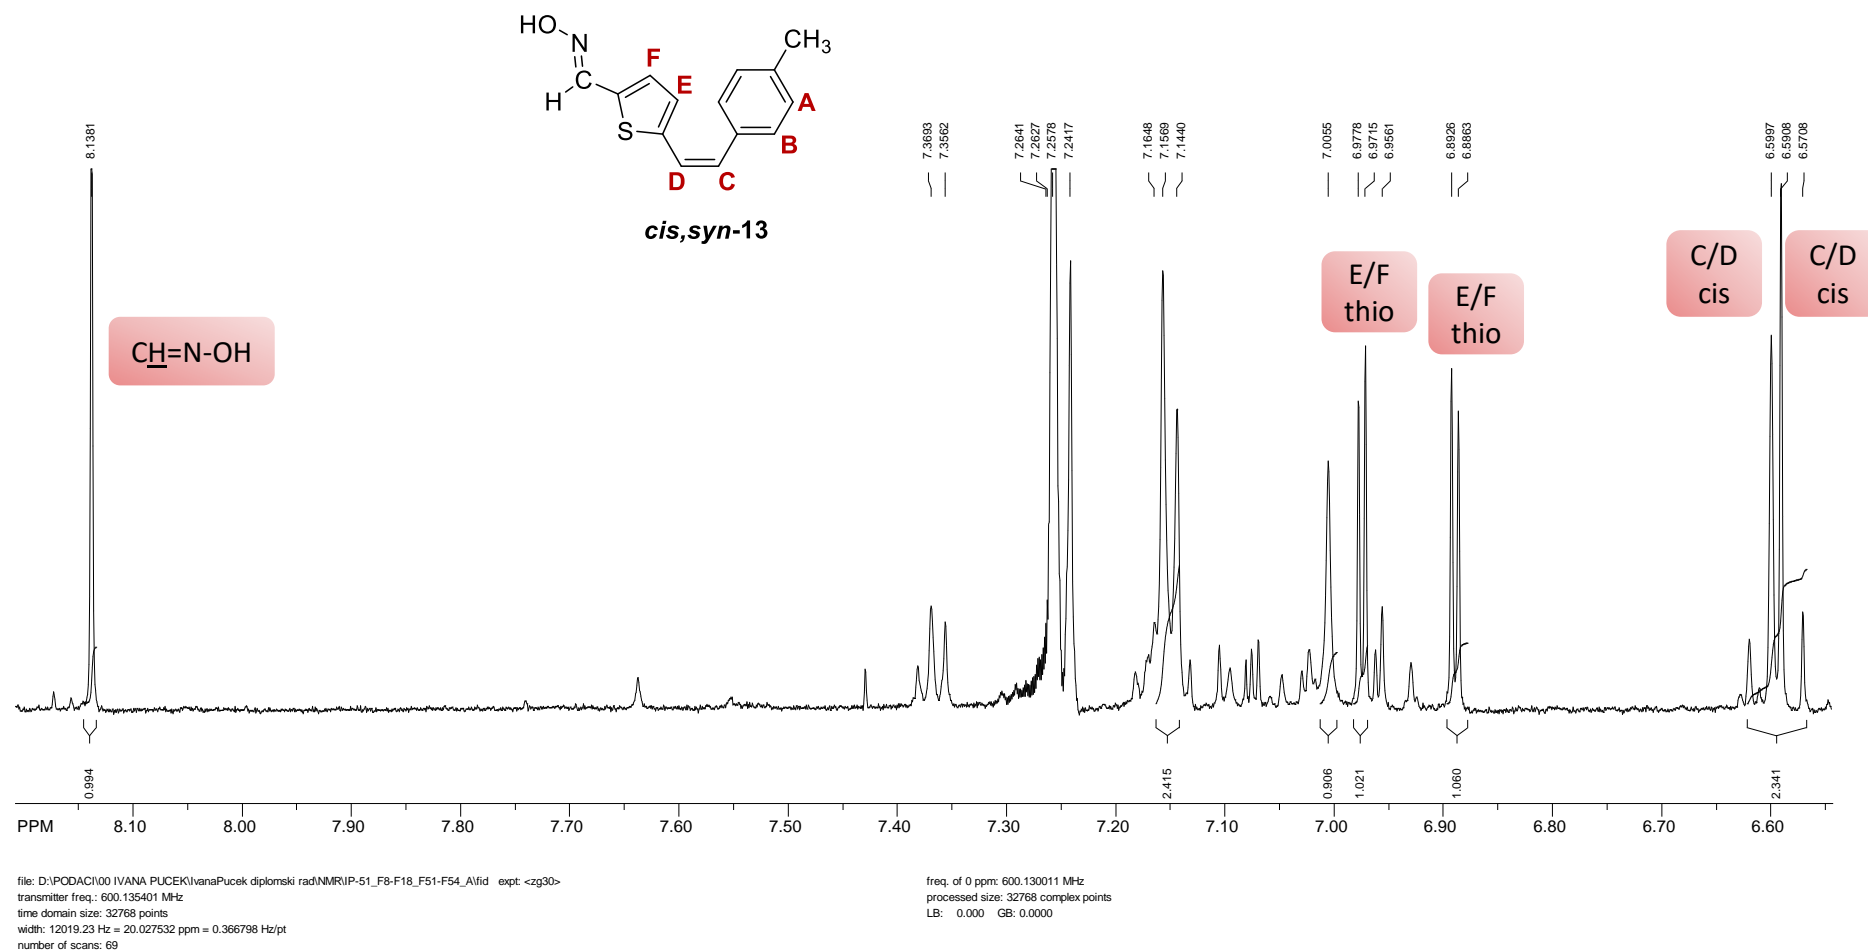

# Mass spectra and HRMS analysis of the mixture of geometrical isomers of 5-(4-methylstyryl)thiophene-2-carbaldehyde oxime (13)

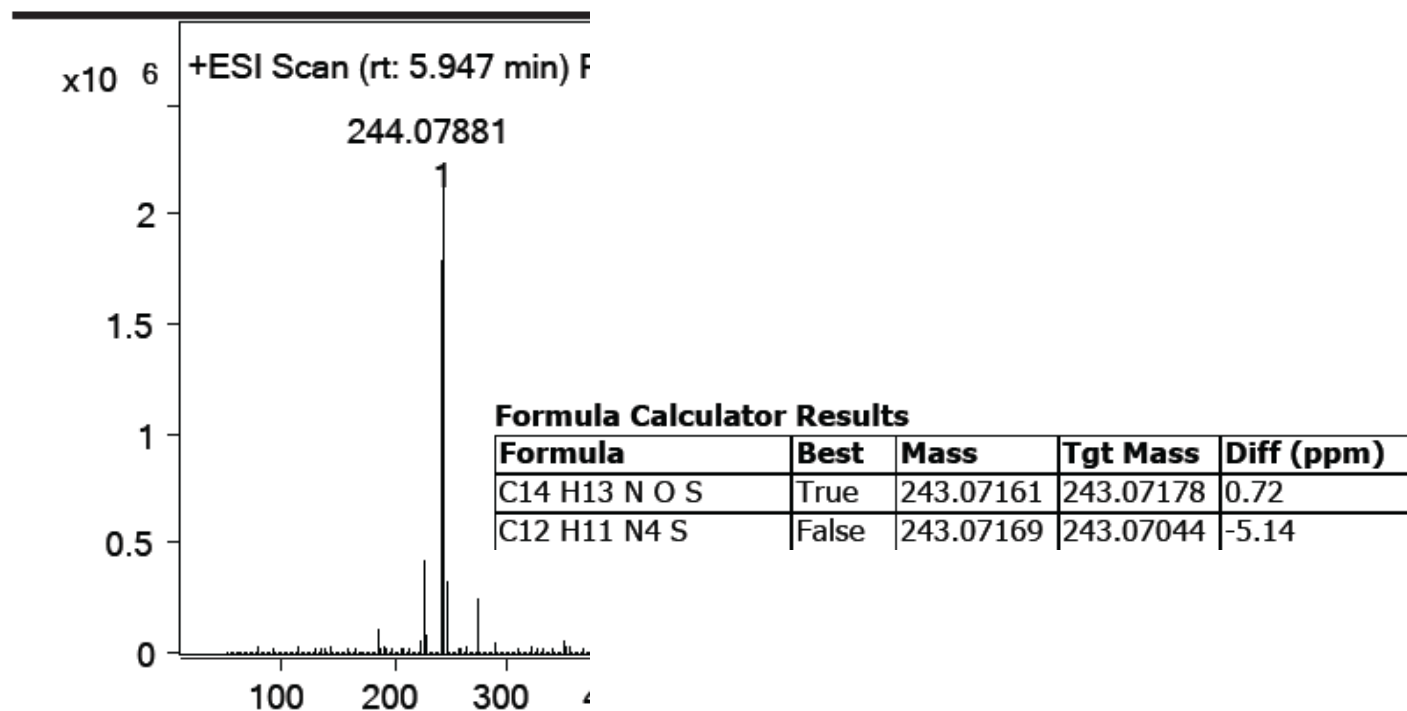

**$^1\text{H}$  NMR spectrum (600 MHz,  $\text{CDCl}_3 + \text{CD}_3\text{OD}$ ) of *trans,anti*-5-(4-methoxystyryl)thiophene-2-carbaldehyde oxime (*trans,anti*-14)**

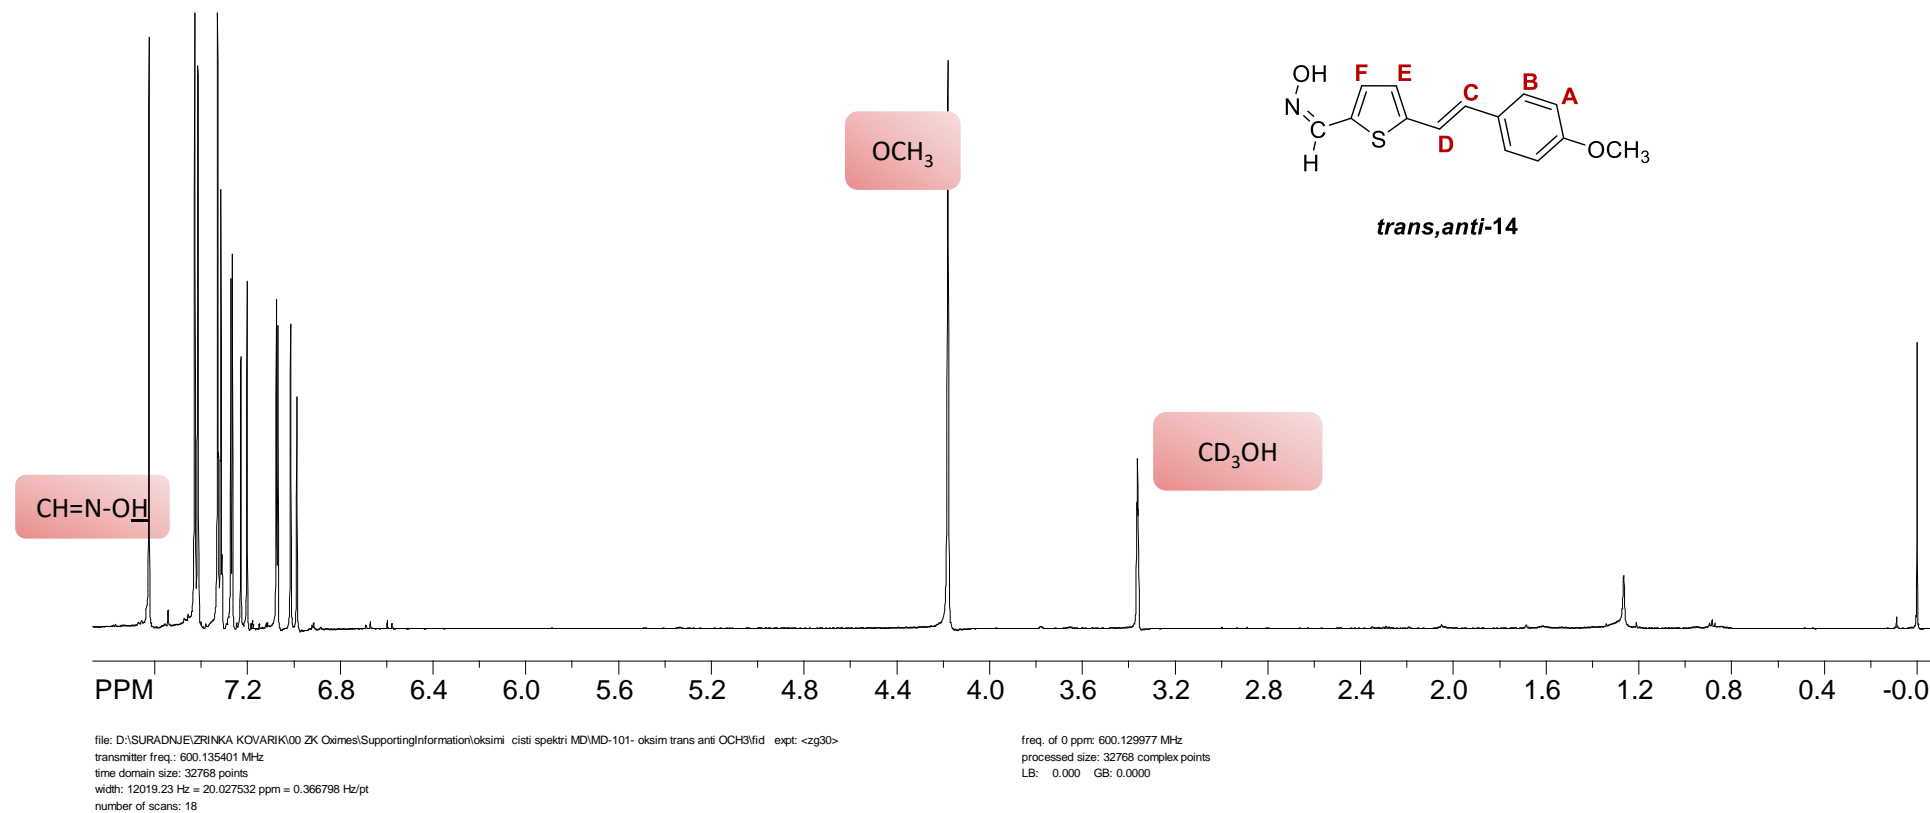

A part of the  $^1\text{H}$  NMR spectrum (600 MHz,  $\text{CDCl}_3 + \text{CD}_3\text{OD}$ ) of *trans,anti*-5-(4-methoxystyryl)thiophene-2-carbaldehyde oxime (*trans,anti*-14)

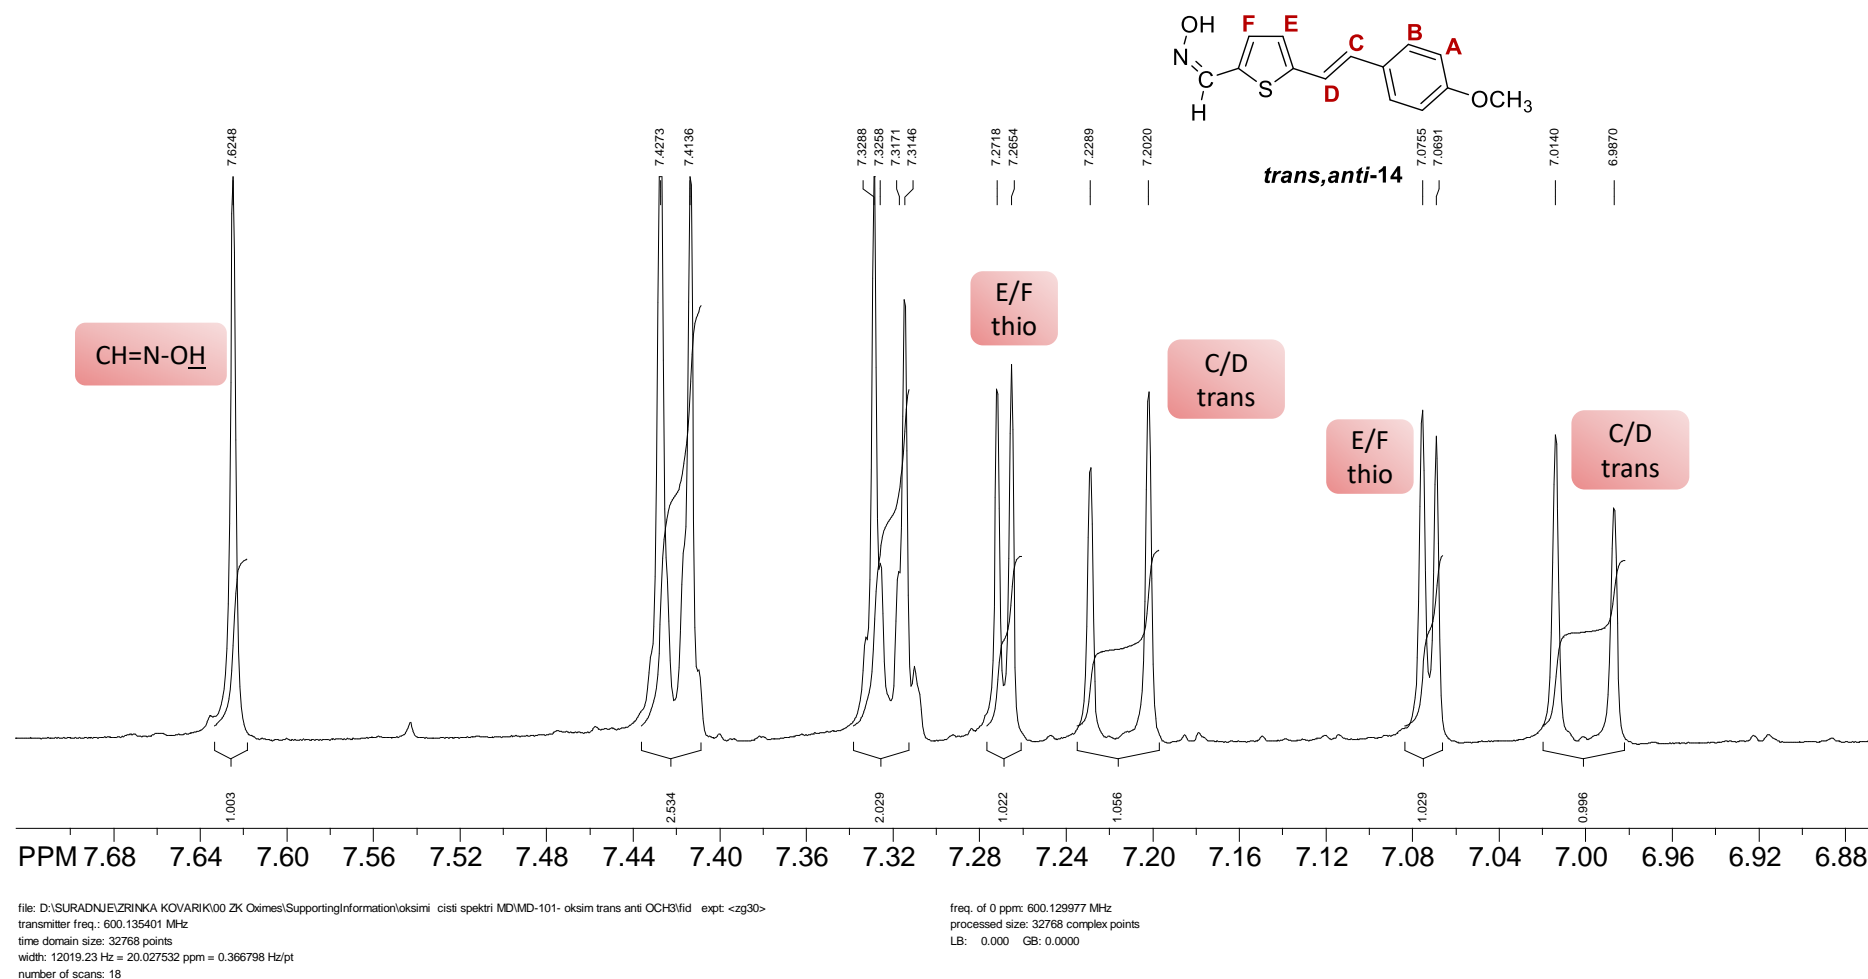

**$^{13}\text{C}$  NMR spectrum (150 MHz,  $\text{CDCl}_3 + \text{CD}_3\text{OD}$ ) of *trans,anti*-5-(4-methoxystyryl)thiophene-2-carbaldehyde oxime (*trans,anti*-14)**

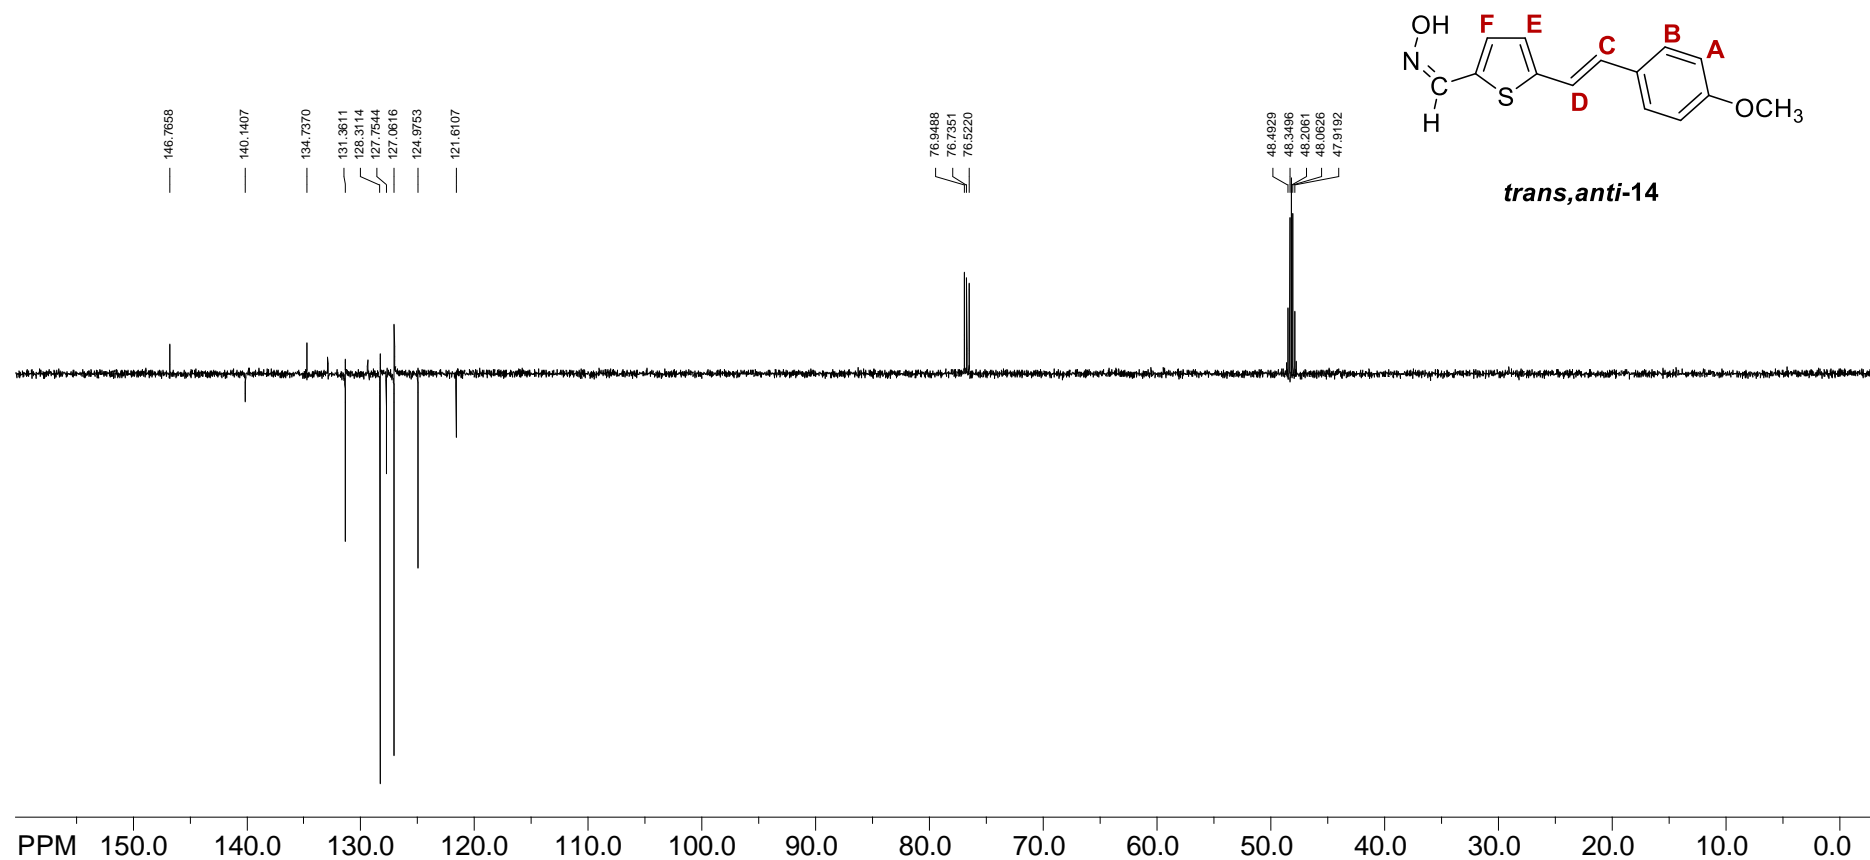

file: D:\SURADNJE\ZRNIKA KOVARIK\00 ZK Oximes\SupportingInformation\oksimi cisti spektri MDIMD-101 APT- oksim trans anti OCH3\fid exp: <jmod>  
 transmitter freq.: 150.917899 MHz  
 time domain size: 65536 points  
 width: 39370.08 Hz = 260.870838 ppm = 0.600740 Hz/pt  
 number of scans: 1110

freq. of 0 ppm: 150.902884 MHz  
 processed size: 32768 complex points  
 LB: 0.000 GB: 0.0000



<sup>1</sup>H NMR spectrum (600 MHz, CDCl<sub>3</sub>) of *cis,syn*-5-(4-methoxystyryl)thiophene-2-carbaldehyde oxime (*cis,syn*-14)

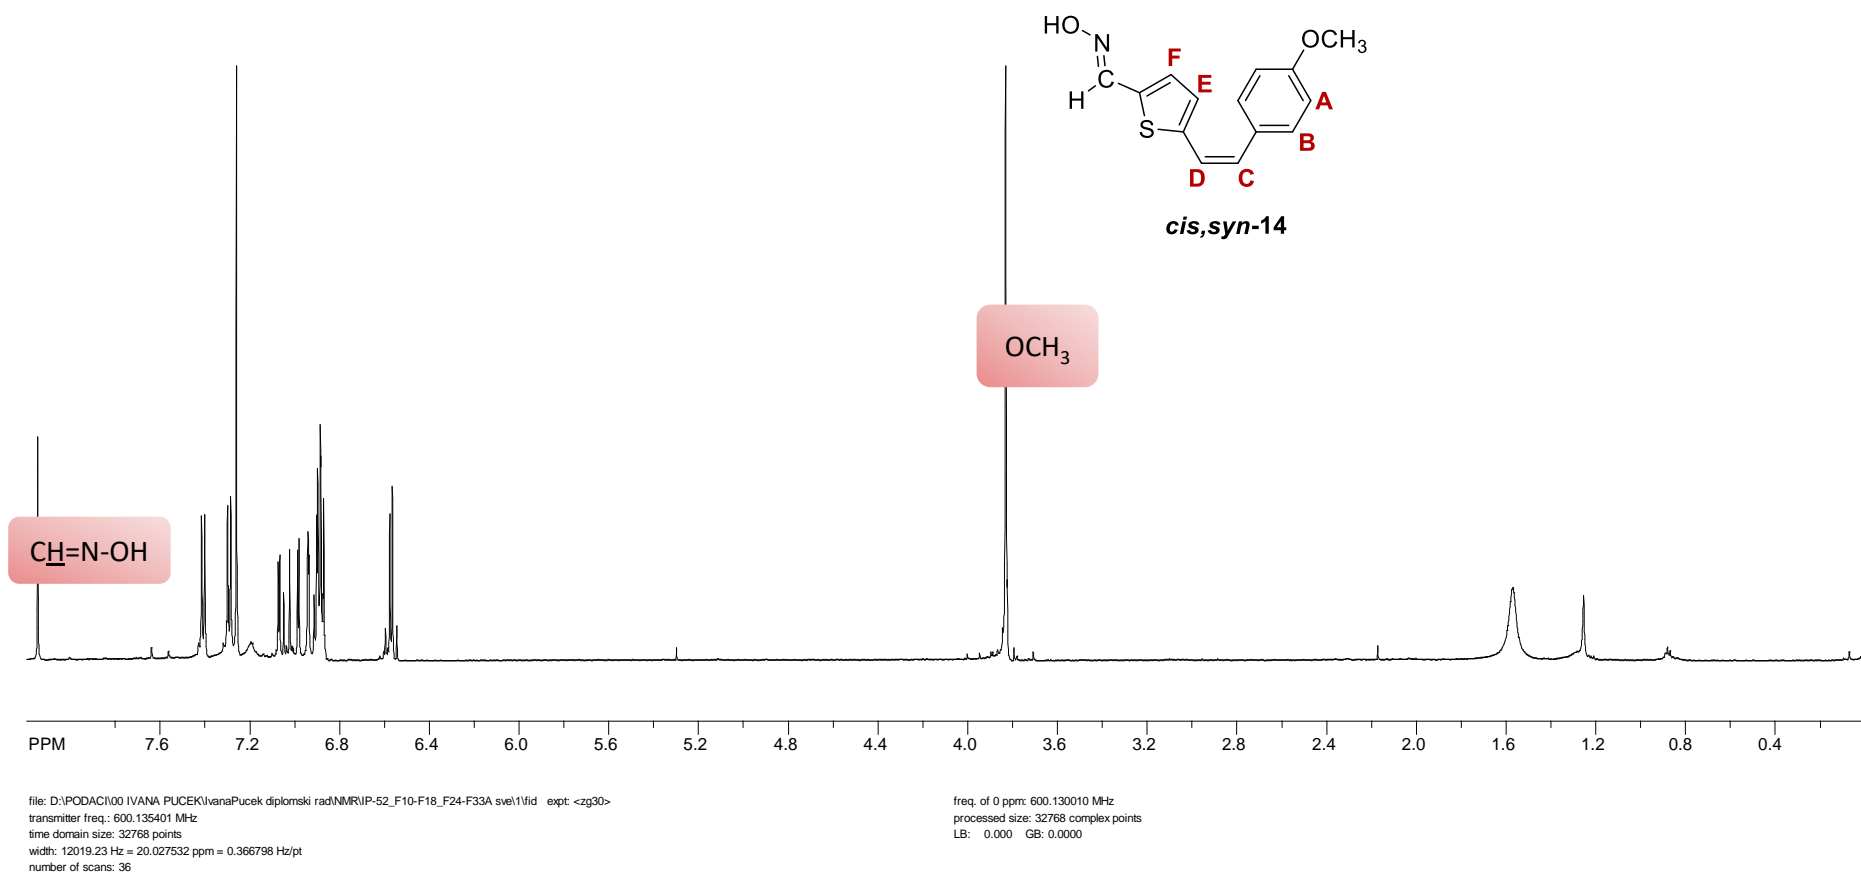

A part of the  $^1\text{H}$  NMR spectrum (600 MHz,  $\text{CDCl}_3$ ) of *cis,syn*-5-(4-methoxystyryl)thiophene-2-carbaldehyde oxime (*cis,syn*-14)

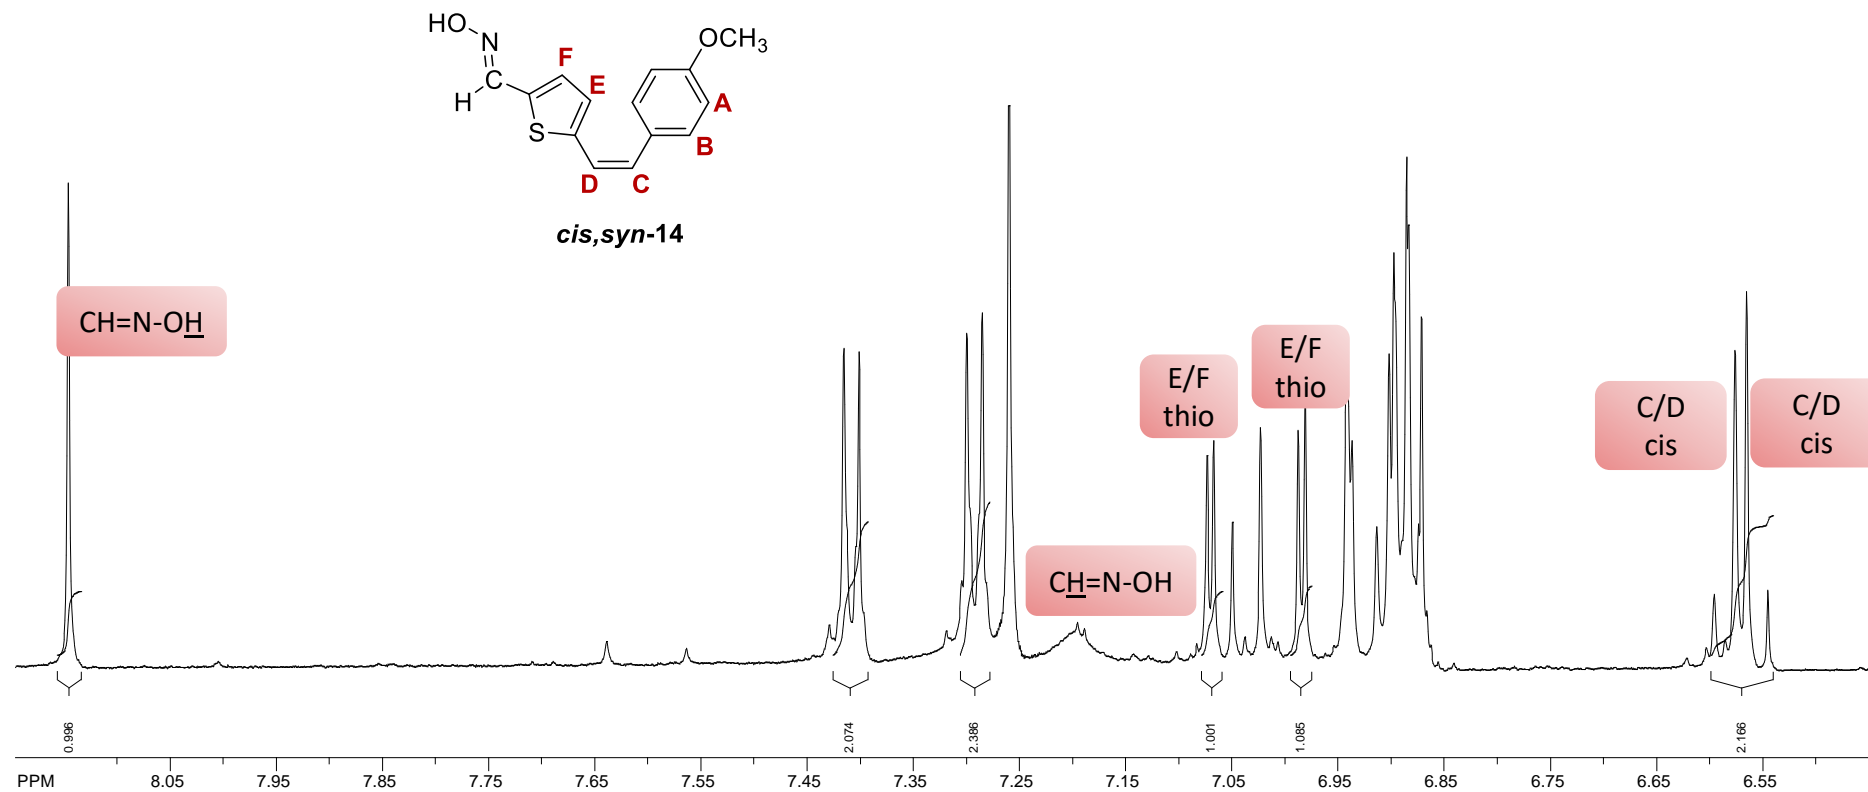

file: D:\PODACI\00 IVANA PUCEK\IvanaPucek diplomski rad\NMR\IP-52\_F10-F18\_F24-F33A sve\1\fid exp: <zg30>  
 transmitter freq.: 600.135401 MHz  
 time domain size: 32768 points  
 width: 12019.23 Hz = 20.027532 ppm = 0.366798 Hz/pt  
 number of scans: 36

freq. of 0 ppm: 600.130010 MHz  
 processed size: 32768 complex points  
 LB: 0.000 GB: 0.0000

**$^{13}\text{C}$  NMR spectrum (150 MHz,  $\text{CDCl}_3$ ) of *cis,syn*-5-(4-methoxystyryl)thiophene-2-carbaldehyde oxime (*cis,syn*-14)**

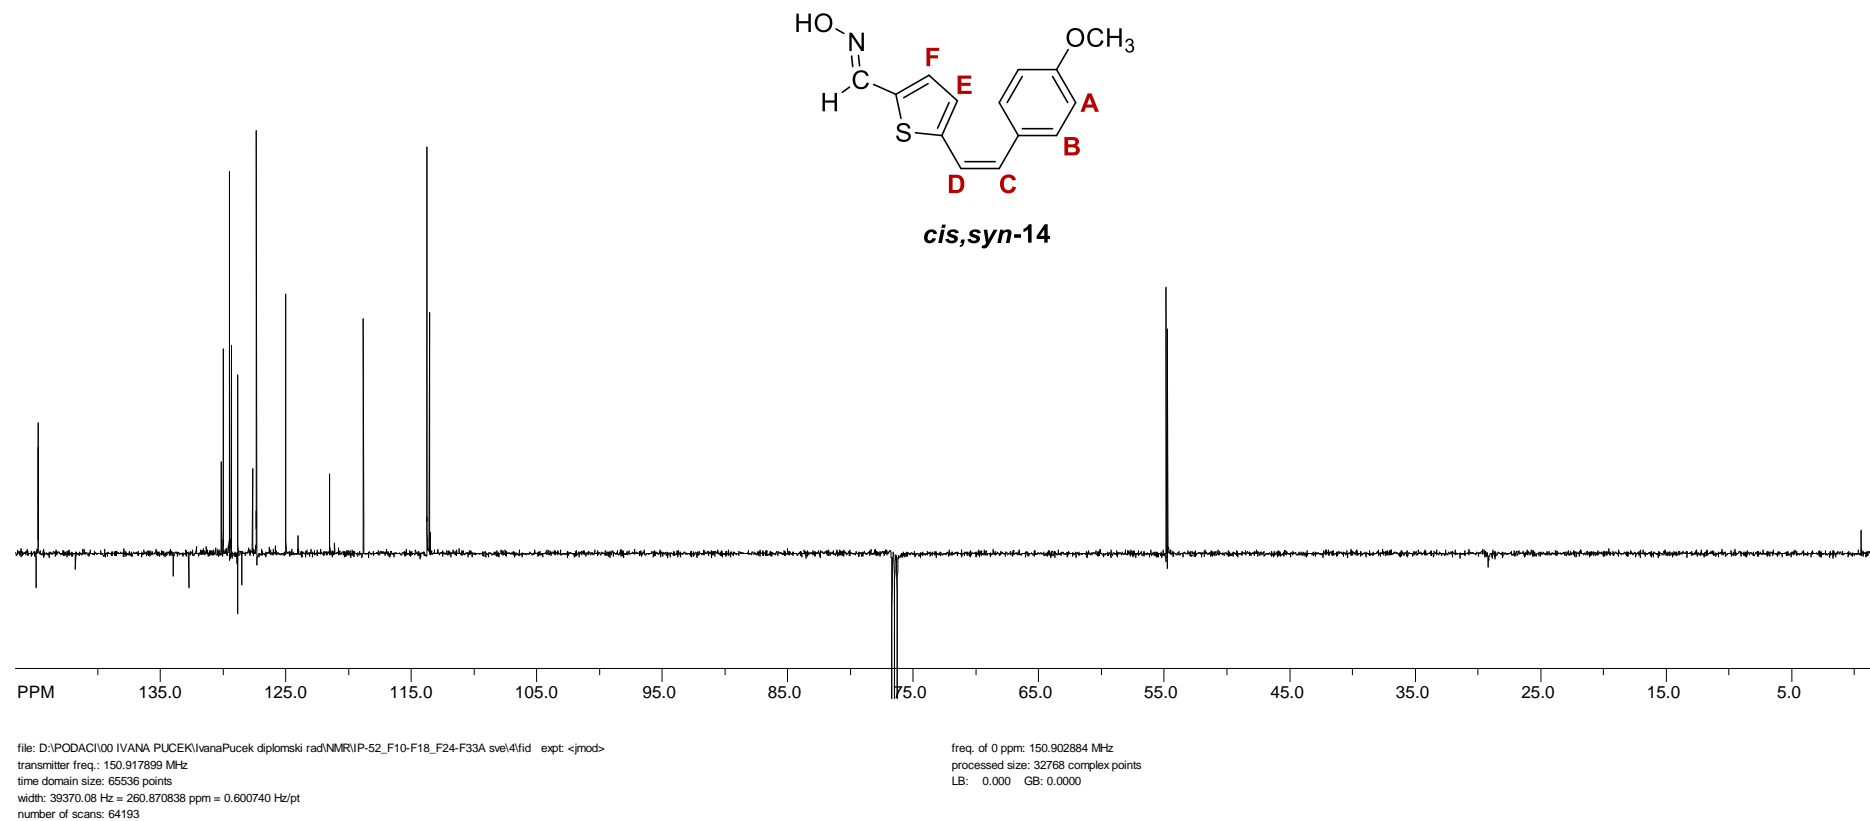

## COSY spectrum of *cis,syn*-5-(4-methoxystyryl)thiophene-2-carbaldehyde oxime (*cis,syn*-14)

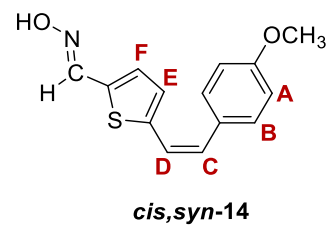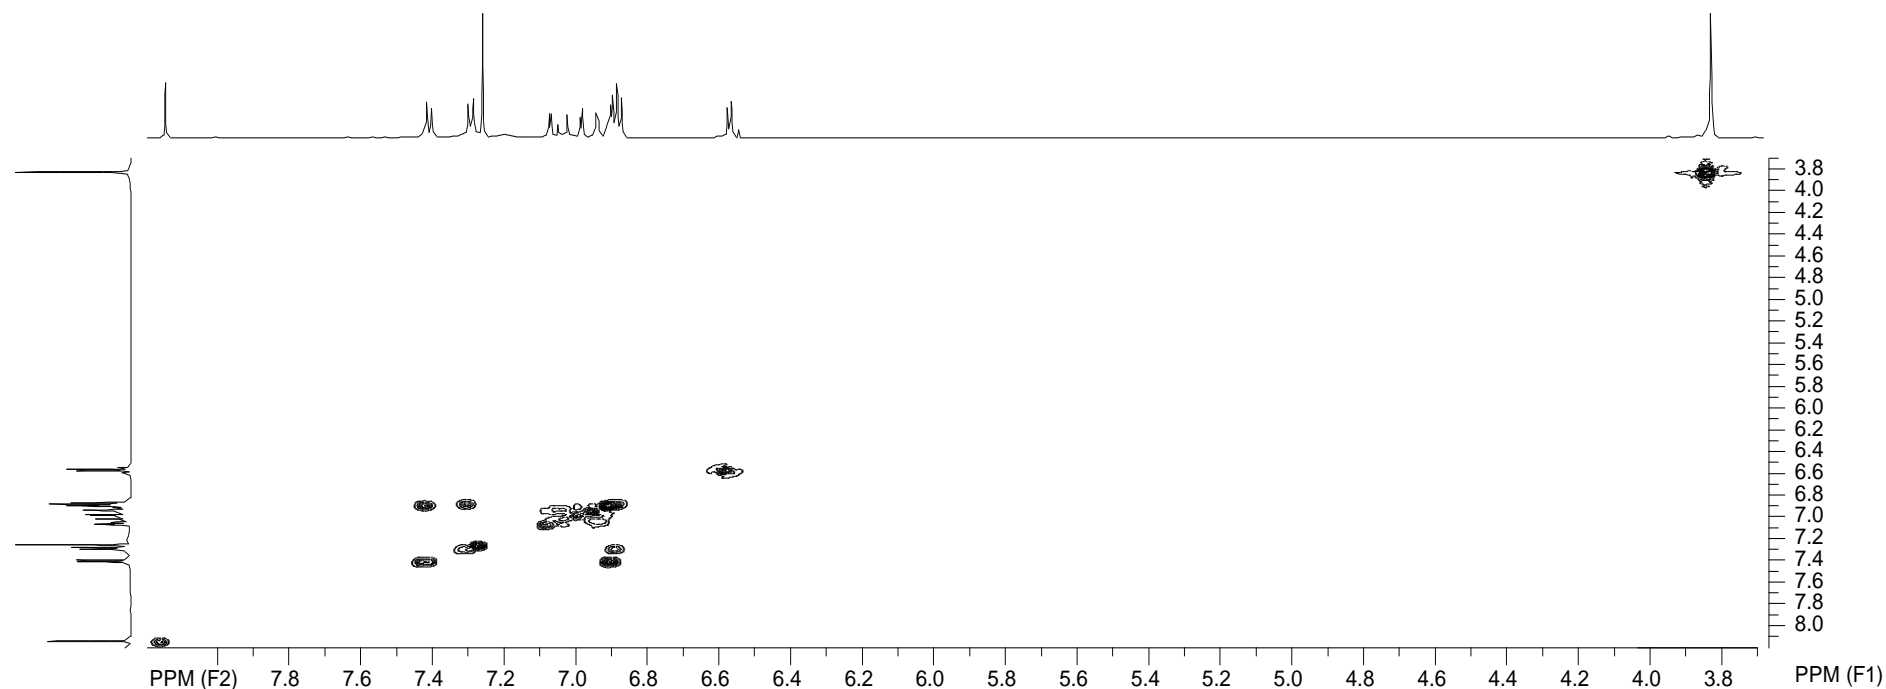

file: D:\PODACI\00 IVANA PUCEK\IvanaPucek diplomski rad\NMR\IP-52\_F10-F18\_F24-F33A svel2\ser exp: <cosygpqf>  
 transmitter freq.: 600.133901 MHz  
 time domain size: 2048 by 512 points  
 width: 9615.38 Hz = 16.022065 ppm = 4.695012 Hz/pt  
 number of scans: 8

F2: freq. of 0 ppm: 600.130000 MHz  
 processed size: 1024 complex points  
 window function: Sine  
 shift: 0.0 degrees

F1: freq. of 0 ppm: 600.130000 MHz  
 processed size: 1024 complex points  
 window function: Sine  
 shift: 0.0 degrees

## HSQC spectrum of *cis,syn*-5-(4-methoxystyryl)thiophene-2-carbaldehyde oxime (*cis,syn*-14)

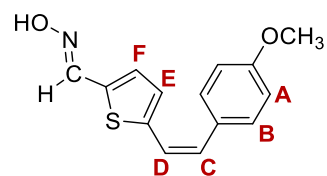

***cis,syn*-14**

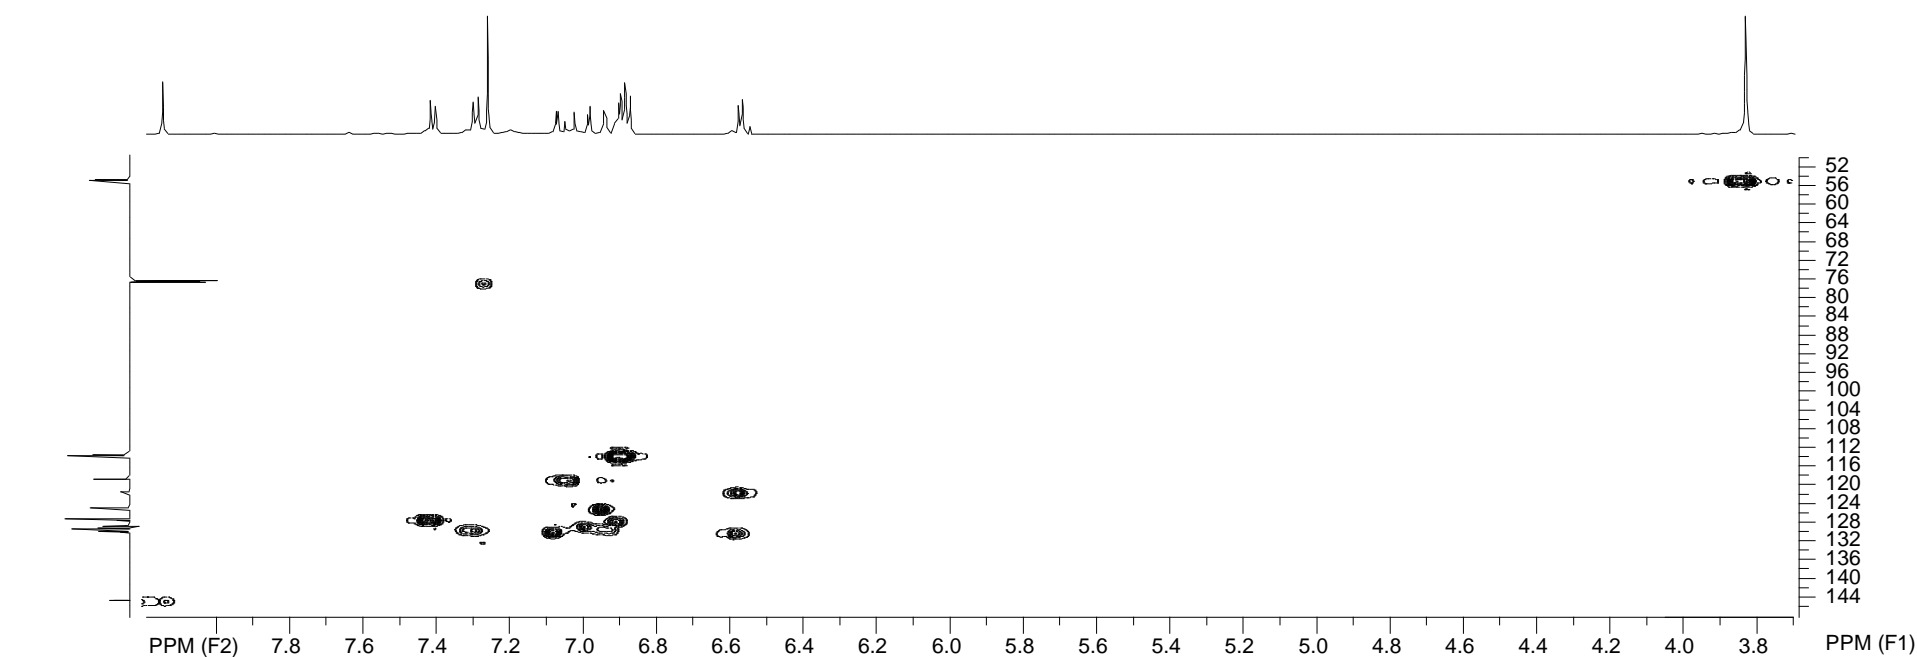

file: D:\PODACI\00 IVANA PUČEK\IvanaPucek diplomski rad\NMR\IP-52\_F10-F18\_F24-F33A sve\3\ser exp: <inv4gpcq>  
 transmitter freq.: 600.133901 MHz  
 time domain size: 2048 by 256 points  
 width: 9615.38 Hz = 16.022065 ppm = 4.695012 Hz/pt  
 number of scans: 128

F2: freq. of 0 ppm: 600.130000 MHz  
 processed size: 1024 complex points  
 window function: Sine  
 shift: 0.0 degrees

F1: freq. of 0 ppm: 150.902809 MHz  
 processed size: 1024 complex points  
 window function: Sine  
 shift: 0.0 degrees

**$^1\text{H}$  NMR spectrum (600 MHz,  $\text{CDCl}_3$ ) of *trans,syn*-5-(4-methoxystyryl)thiophene-2-carbaldehyde oxime (*trans,syn*-14)**

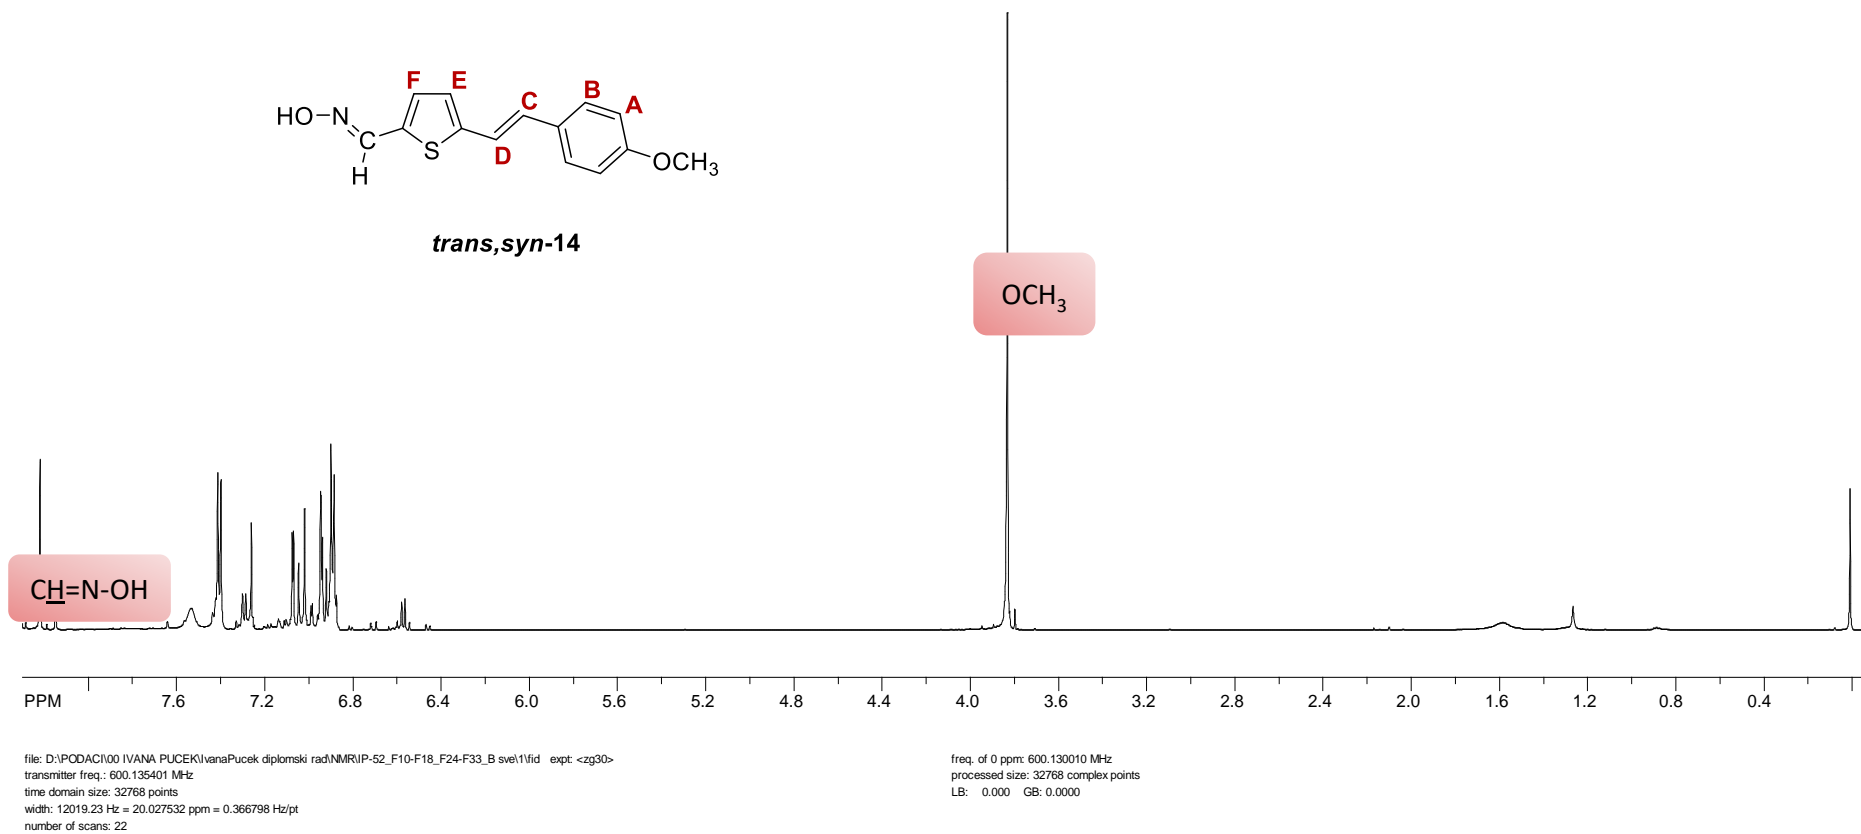

A part of the  $^1\text{H}$  NMR spectrum (600 MHz,  $\text{CDCl}_3$ ) of *trans,syn*-5-(4-methoxystyryl)thiophene-2-carbaldehyde oxime (*trans,syn*-14)

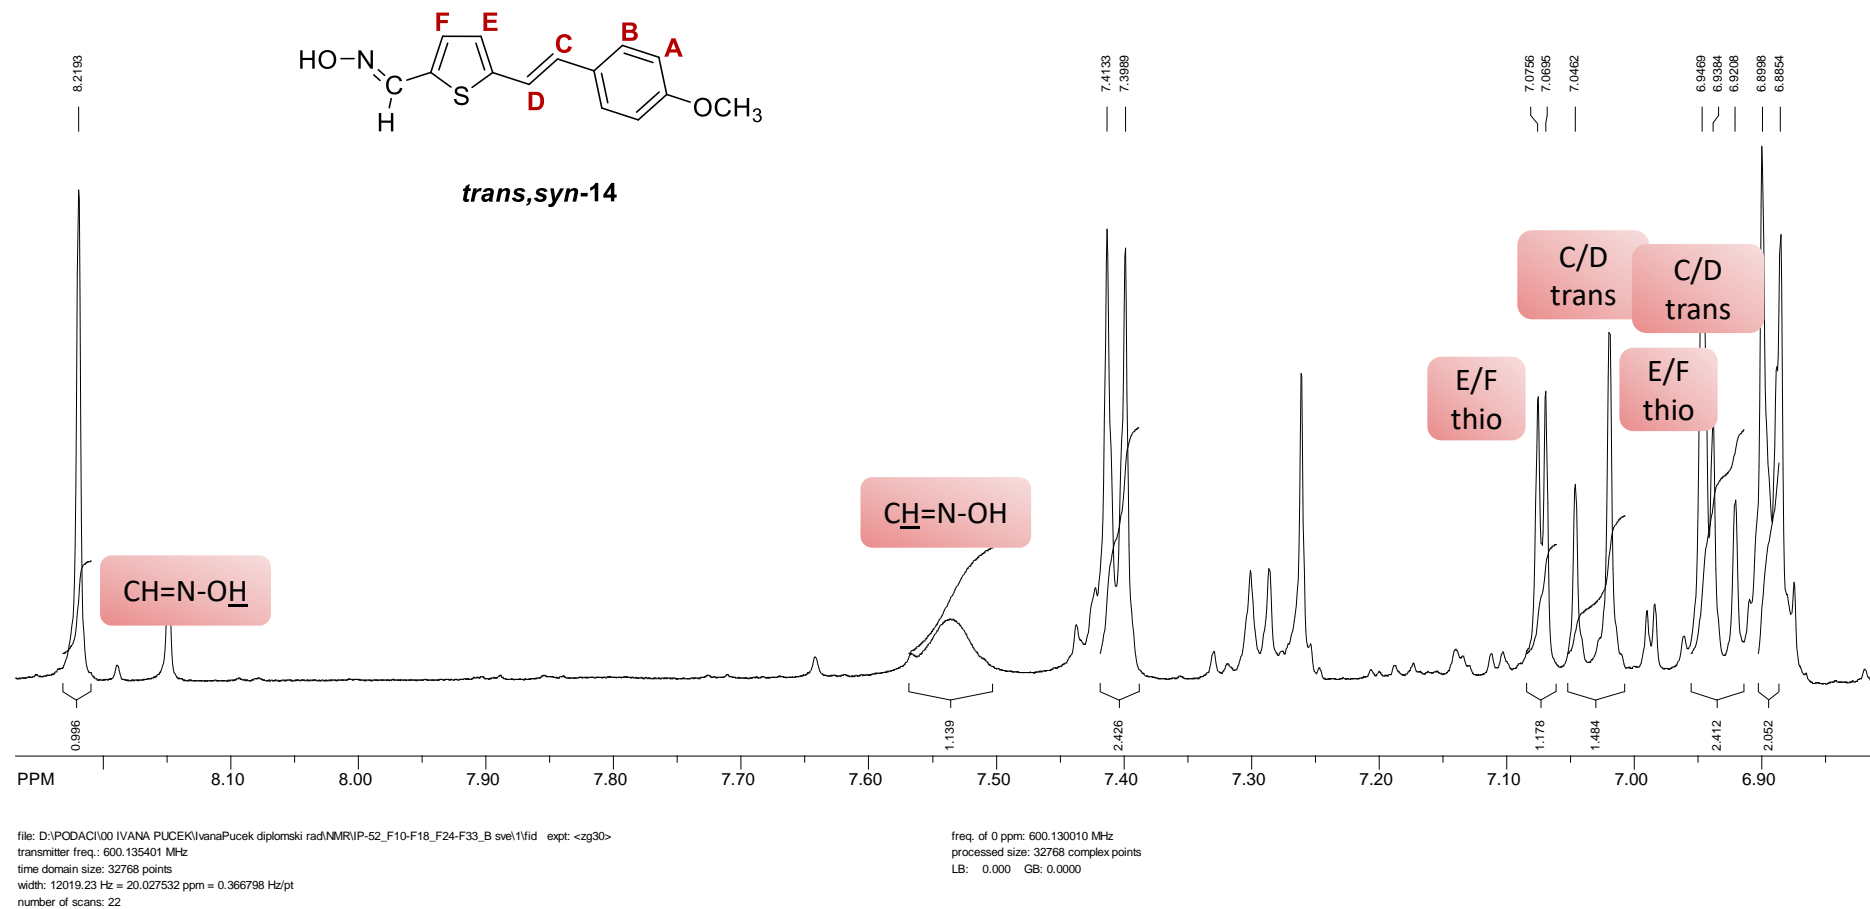

**<sup>13</sup>C NMR spectrum (150 MHz, CDCl<sub>3</sub>) of *trans,syn*-5-(4-methoxystyryl)thiophene-2-carbaldehyde oxime (*trans,syn*-14)**

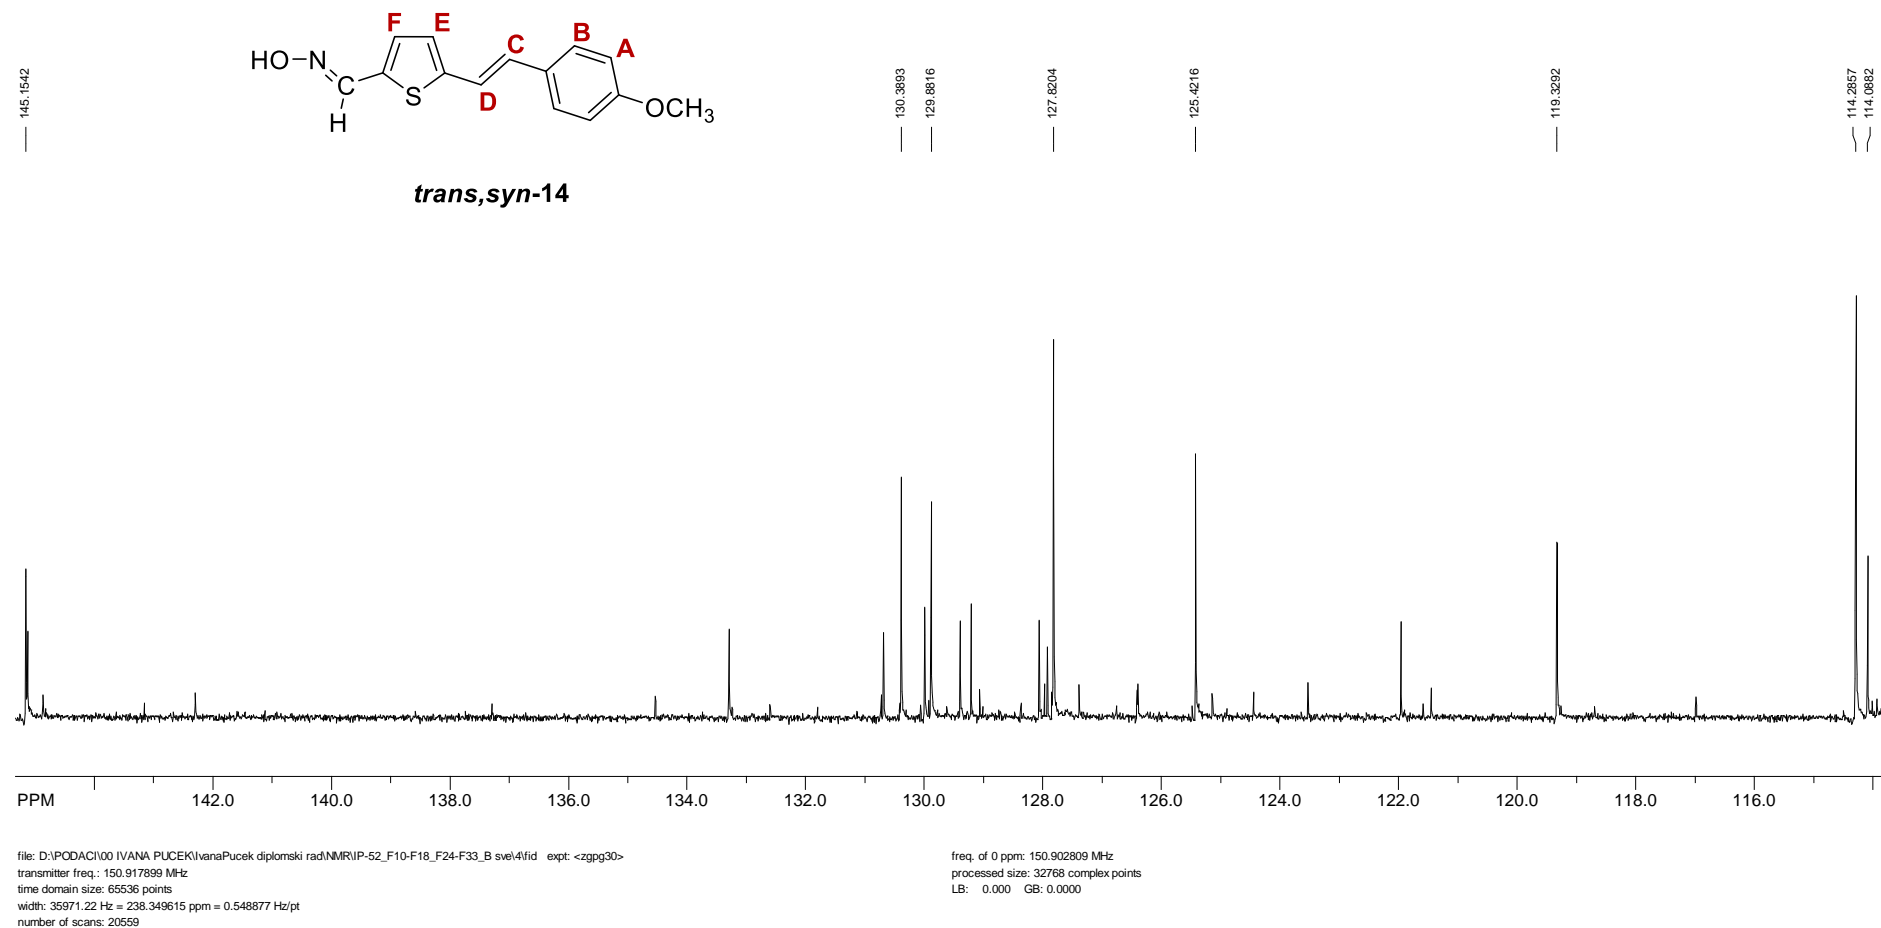



## COSY spectrum of *trans,syn*-5-(4-methoxystyryl)thiophene-2-carbaldehyde oxime (*trans,syn*-14)

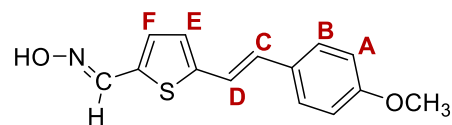

***trans,syn*-14**

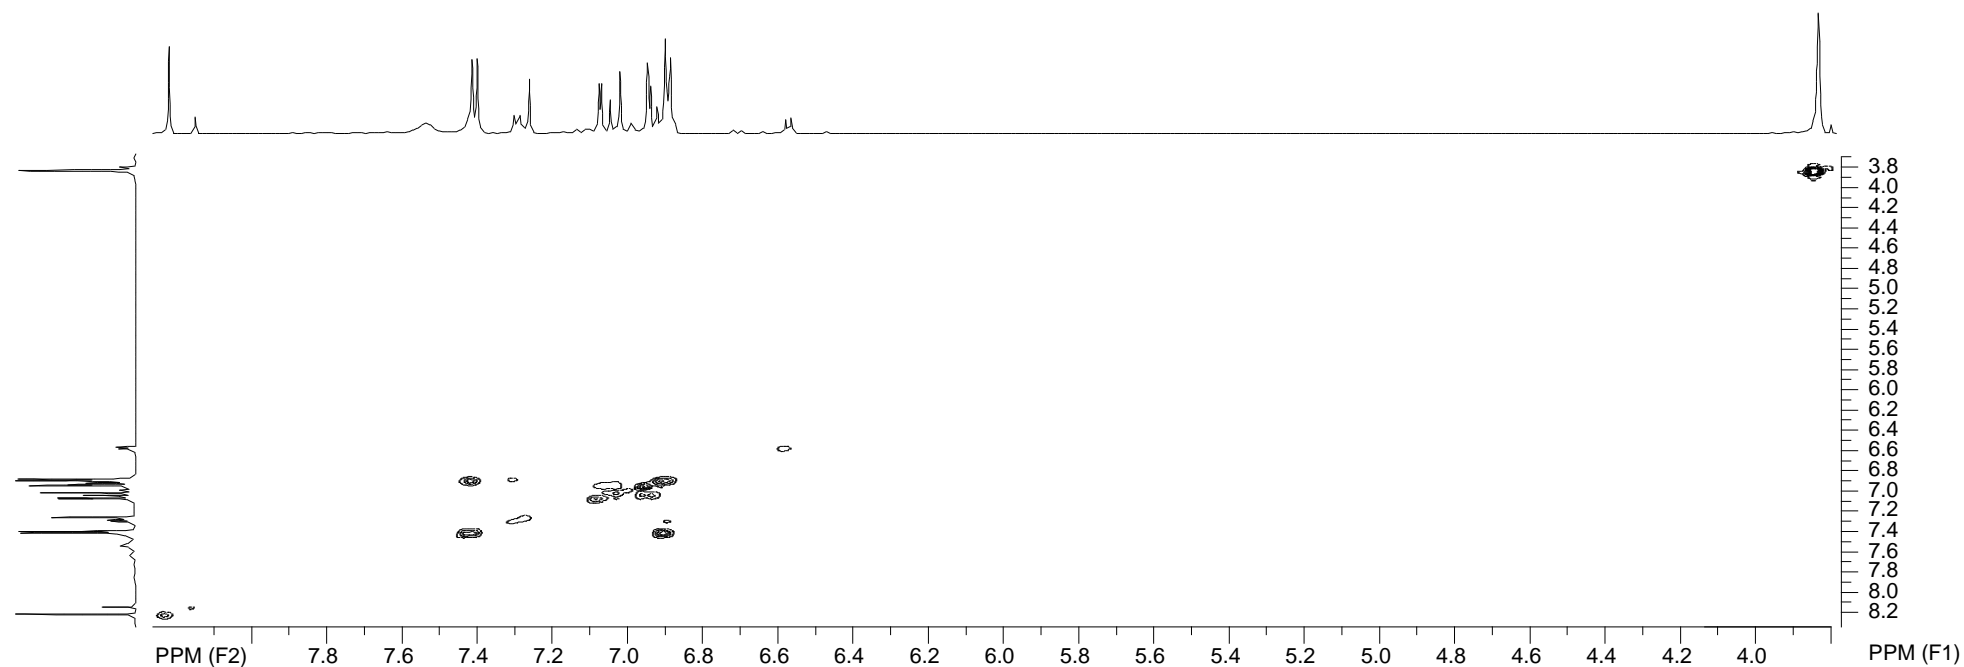

file: D:\PODAC\I00 IVANA PUCEK\IvanaPucek diplomski rad\NMR\IP-52\_F10-F18\_F24-F33\_B svel2\ser exp: <cosy\gpcf>  
 transmitter freq.: 600.133901 MHz  
 time domain size: 2048 by 512 points  
 width: 9615.38 Hz = 16.022065 ppm = 4.695012 Hz/pt  
 number of scans: 4

F2: freq. of 0 ppm: 600.130000 MHz  
 processed size: 1024 complex points  
 window function: Sine  
 shift: 0.0 degrees

F1: freq. of 0 ppm: 600.130000 MHz  
 processed size: 1024 complex points  
 window function: Sine  
 shift: 0.0 degrees

## HSQC spectrum of *trans,syn*-5-(4-methoxystyryl)thiophene-2-carbaldehyde oxime (*trans,syn*-14)

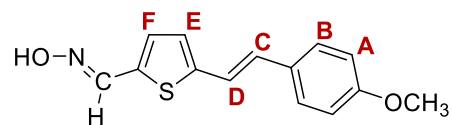

*trans,syn*-14

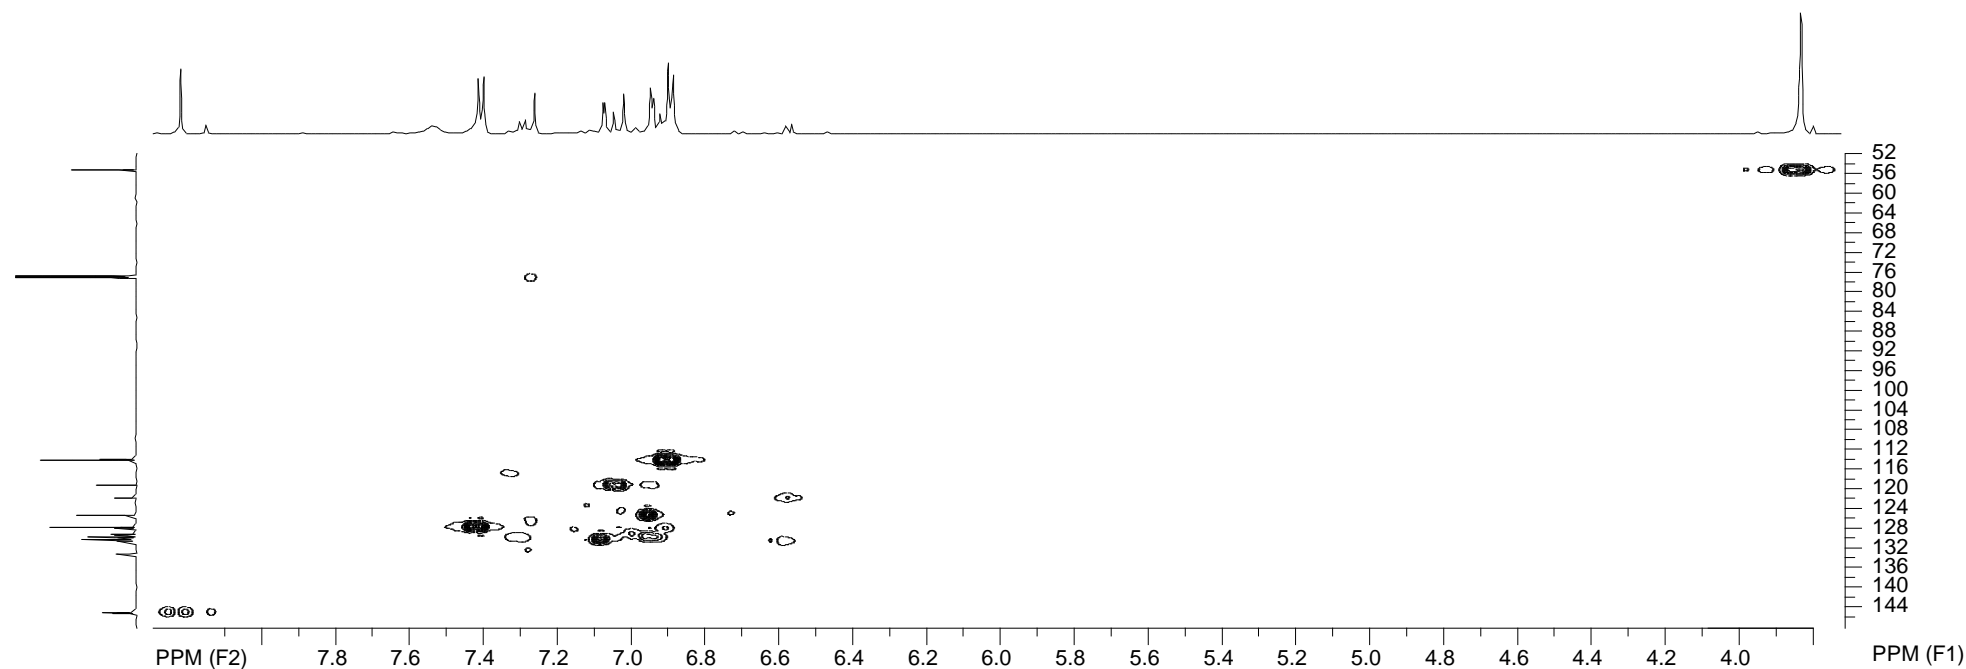

file: D:\PODAC\00 IVANA PUCEK\IvanaPucek diplomski rad\NMR\IP-52\_F10-F18\_F24-F33\_B s\el3\ser exp: <inv4gqf>  
 transmitter freq.: 600.133901 MHz  
 time domain size: 2048 by 256 points  
 width: 9615.38 Hz = 16.022065 ppm = 4.695012 Hz/pt  
 number of scans: 64

F2: freq. of 0 ppm: 600.130000 MHz  
 processed size: 1024 complex points  
 window function: Sine  
 shift: 0.0 degrees

F1: freq. of 0 ppm: 150.902809 MHz  
 processed size: 1024 complex points  
 window function: Sine  
 shift: 0.0 degrees

# Mass spectra and HRMS analysis of the mixture of geometrical isomers of 5-(4-methoxystyryl)thiophene-2-carbaldehyde oxime (14)

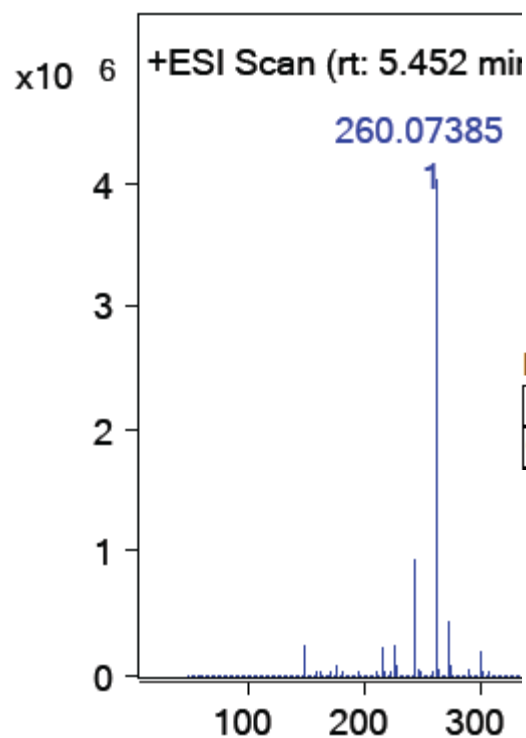

## Formula Calculator Results

| Formula        | Best | Mass      | Tgt Mass | Diff (ppm) |
|----------------|------|-----------|----------|------------|
| C14 H13 N O2 S | True | 259.06659 | 259.0667 | 0.43       |

**$^1\text{H}$  NMR spectrum (600 MHz,  $\text{CDCl}_3$ ) of *trans,syn*-5-(4-chlorostyryl)thiophene-2-carbaldehyde oxime (*trans,syn*-15)**

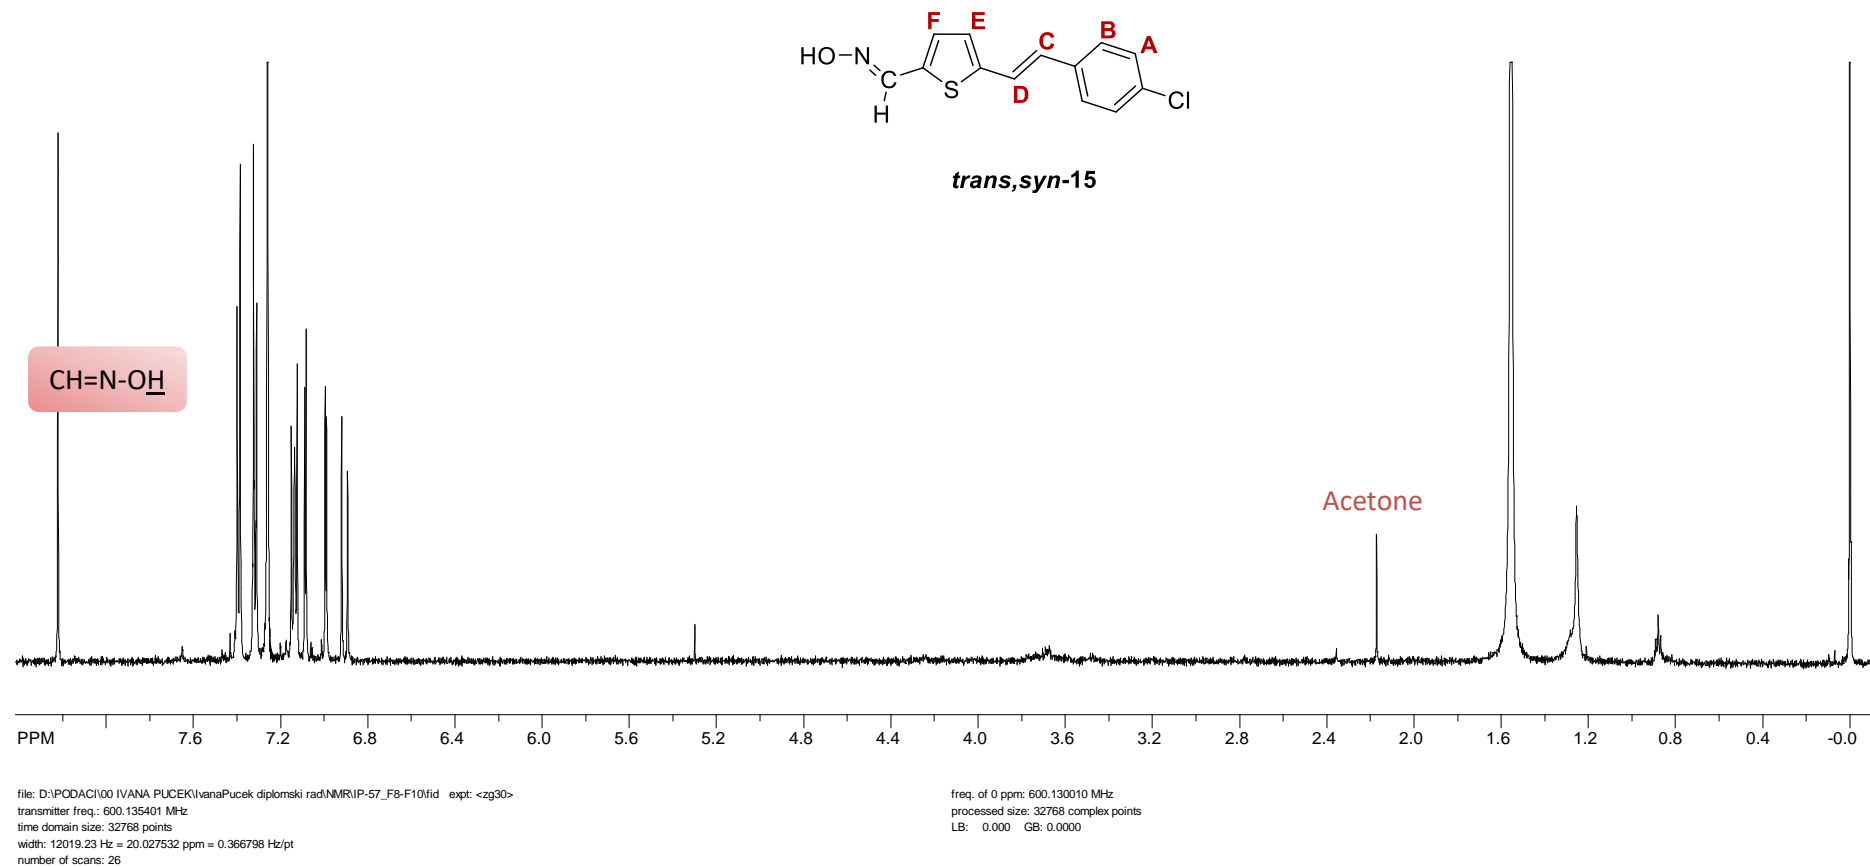

A part of the  $^1\text{H}$  NMR spectrum (600 MHz,  $\text{CDCl}_3$ ) of *trans,syn*-5-(4-chlorostyryl)thiophene-2-carbaldehyde oxime (*trans,syn*-15)

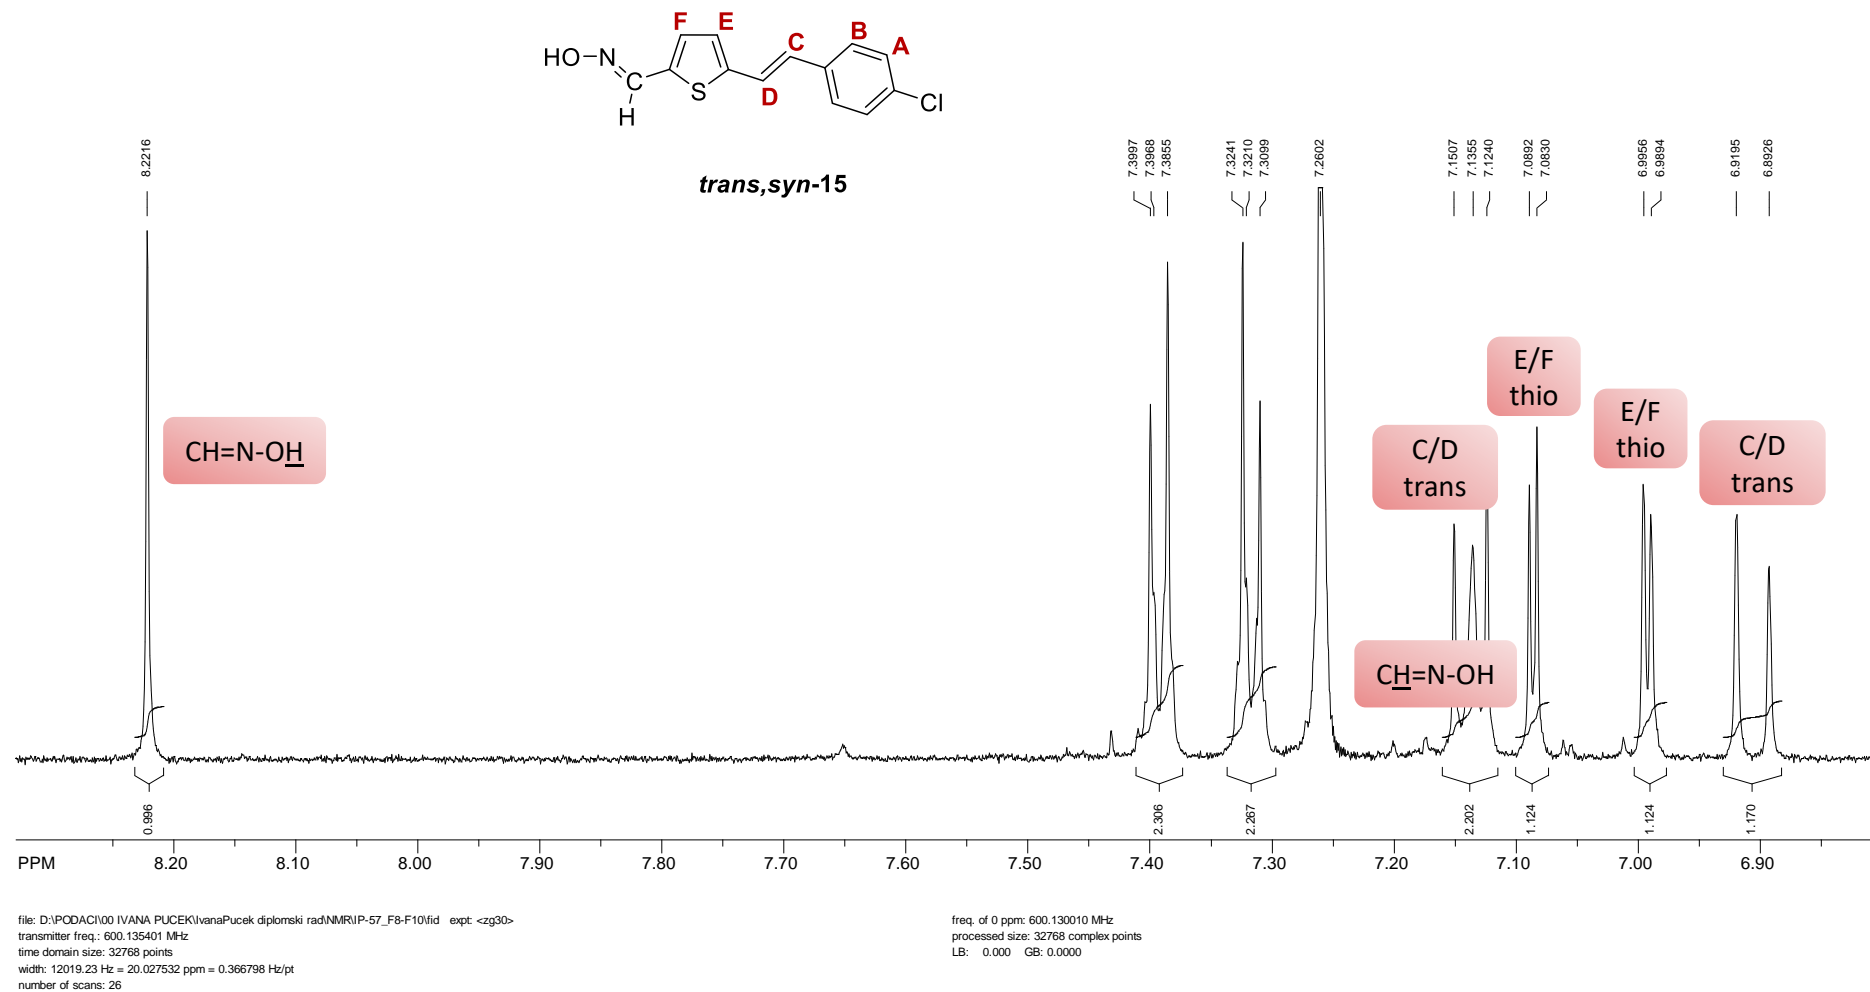

**$^{13}\text{C}$  NMR spectrum (150 MHz,  $\text{CDCl}_3$ ) of *trans,syn*-5-(4-chlorostyryl)thiophene-2-carbaldehyde oxime (*trans,syn*-15)**

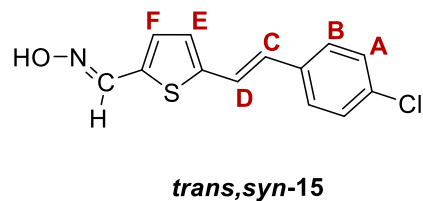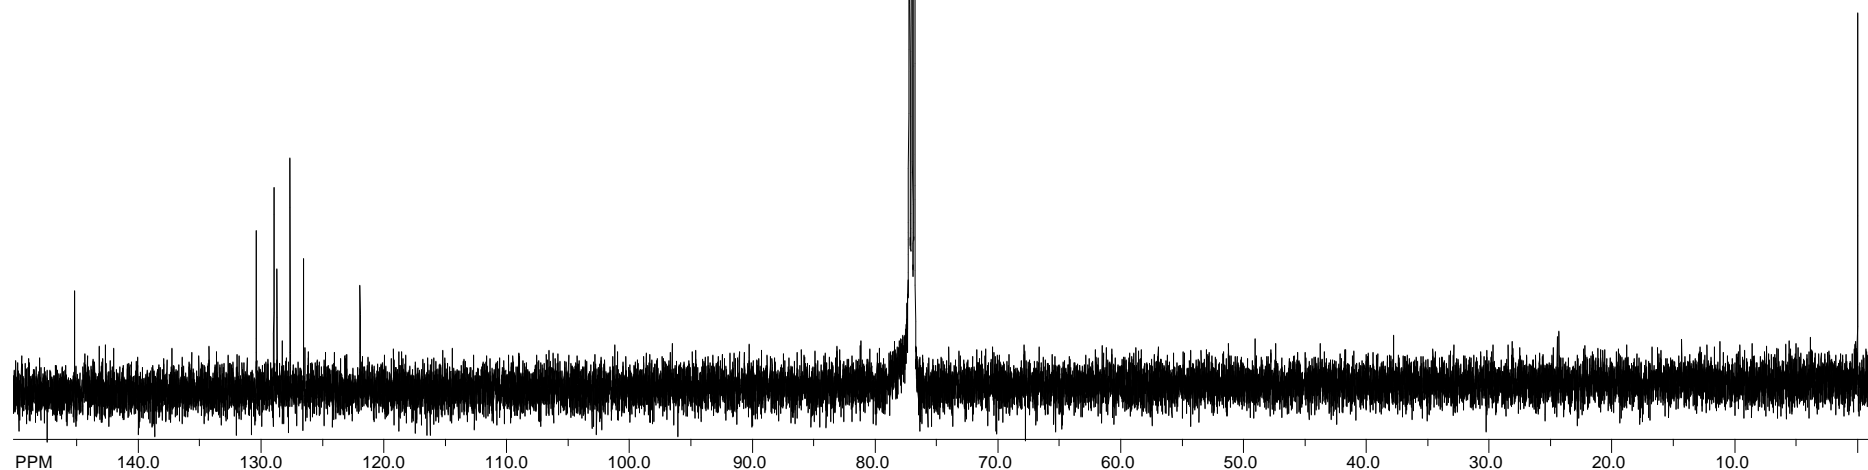

file: D:\PODACI\00 IVANA PUCEK\IvanaPucek diplomski rad\NMR\IP-57\_F8-F10 sve\4\fid exp: <zpgg30>  
transmitter freq.: 150.917899 MHz  
time domain size: 65536 points  
width: 35971.22 Hz = 238.349615 ppm = 0.548877 Hz/pt  
number of scans: 21248

freq. of 0 ppm: 150.902809 MHz  
processed size: 32768 complex points  
LB: 0.000 GB: 0.0000

## COSY spectrum of *trans,syn*-5-(4-chlorostyryl)thiophene-2-carbaldehyde oxime (*trans,syn*-15)

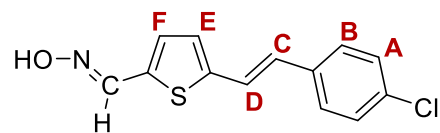

*trans,syn*-15

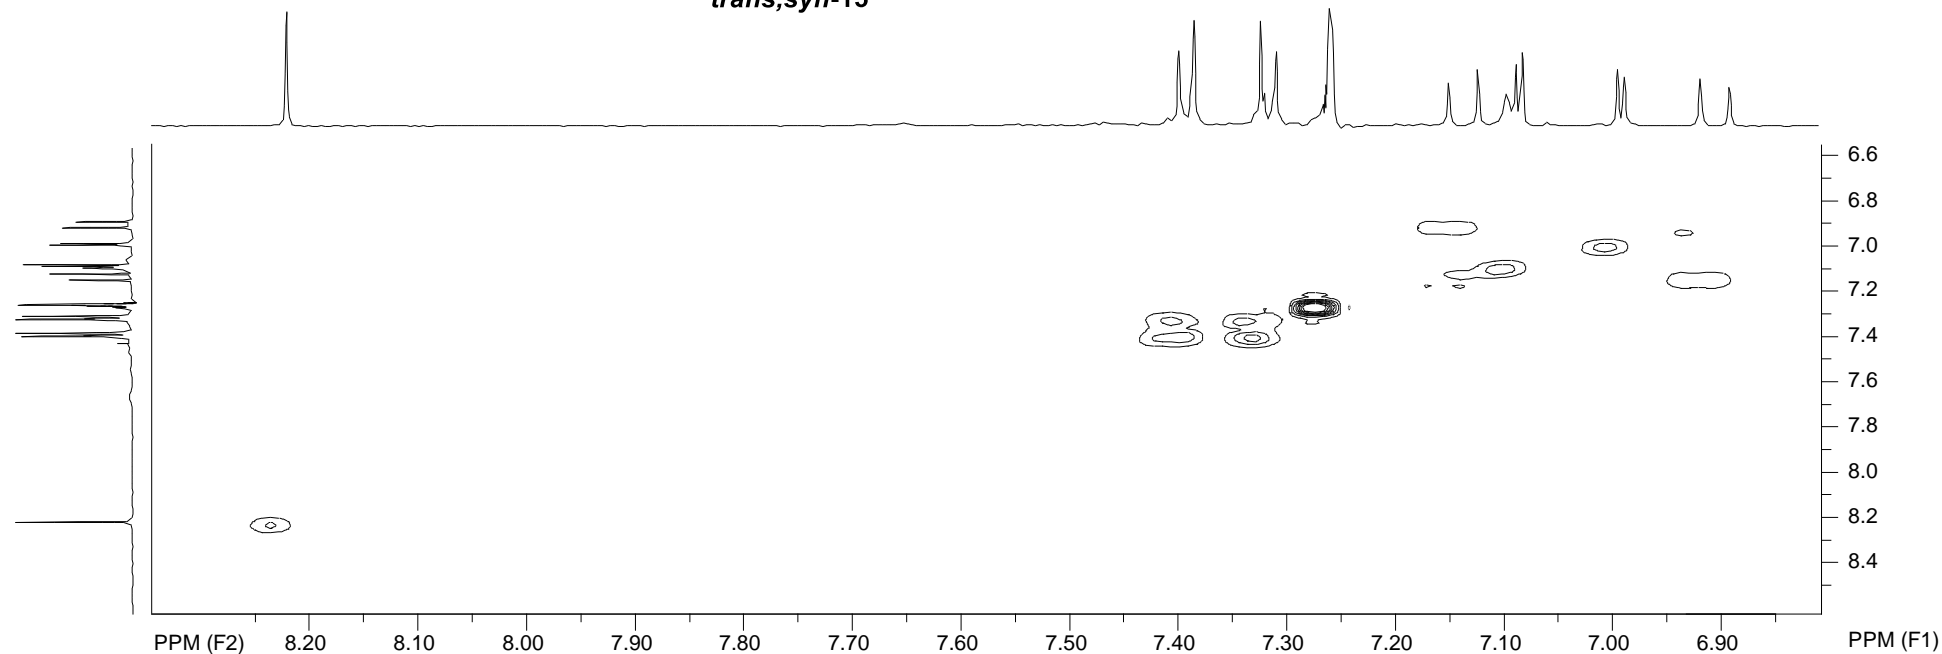

file: D:\PODACI\00 IVANA PUCEK\IvanaPucek diplomski rad\NMR\IP-57\_F8-F10 sve\2\ser exp: <cosygpqf>  
 transmitter freq.: 600.133901 MHz  
 time domain size: 2048 by 512 points  
 width: 9615.38 Hz = 16.022065 ppm = 4.695012 Hz/pt  
 number of scans: 4

F2: freq. of 0 ppm: 600.130000 MHz  
 processed size: 1024 complex points  
 window function: Sine  
 shift: 0.0 degrees

F1: freq. of 0 ppm: 600.130000 MHz  
 processed size: 1024 complex points  
 window function: Sine  
 shift: 0.0 degrees

## HSQC spectrum of *trans,syn*-5-(4-chlorostyryl)thiophene-2-carbaldehyde oxime (*trans,syn*-15)

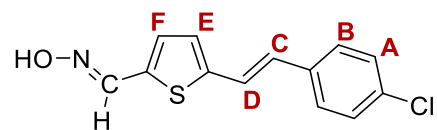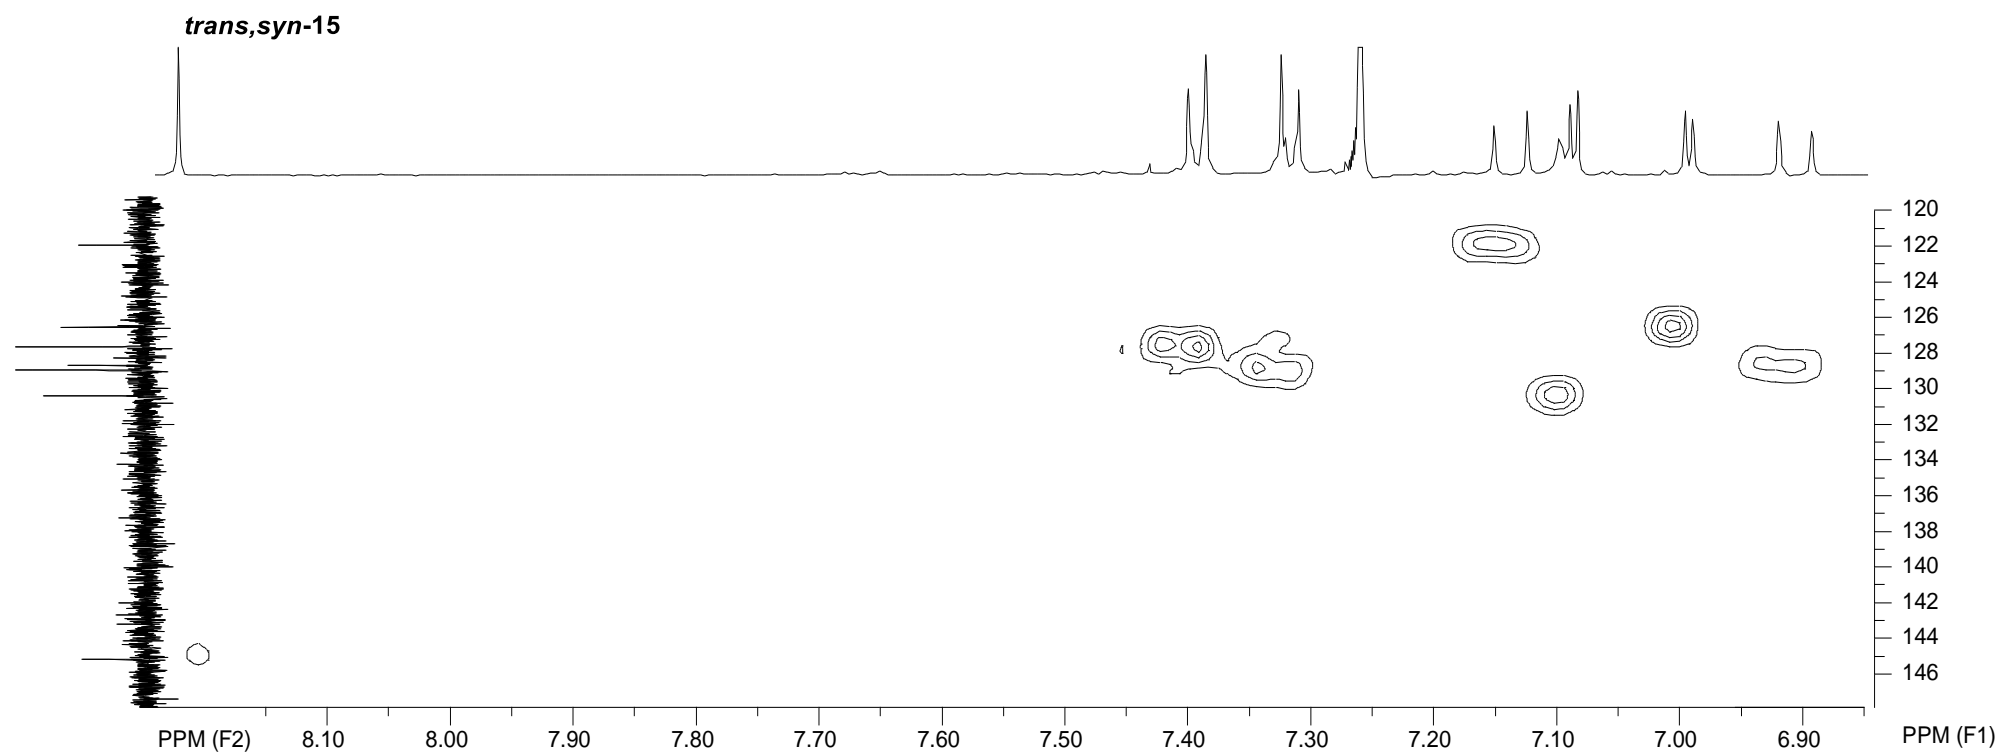

file: D:\PODACI\00\IVANA PUCEK\IvanaPucek diplomski rad\NMR\IP-57\_F8-F10 sve\3\ser exp: <inv4gpqf>  
 transmitter freq.: 600.133901 MHz  
 time domain size: 2048 by 256 points  
 width: 9615.38 Hz = 16.022065 ppm = 4.695012 Hz/pt  
 number of scans: 64

F2: freq. of 0 ppm: 600.130000 MHz  
 processed size: 1024 complex points  
 window function: Sine  
 shift: 0.0 degrees

F1: freq. of 0 ppm: 150.902809 MHz  
 processed size: 1024 complex points  
 window function: Sine  
 shift: 0.0 degrees



**$^1\text{H}$  NMR spectrum (600 MHz,  $\text{CDCl}_3$ ) of *trans,anti*-5-(4-chlorostyryl)thiophene-2-carbaldehyde oxime (*trans,anti*-15)**

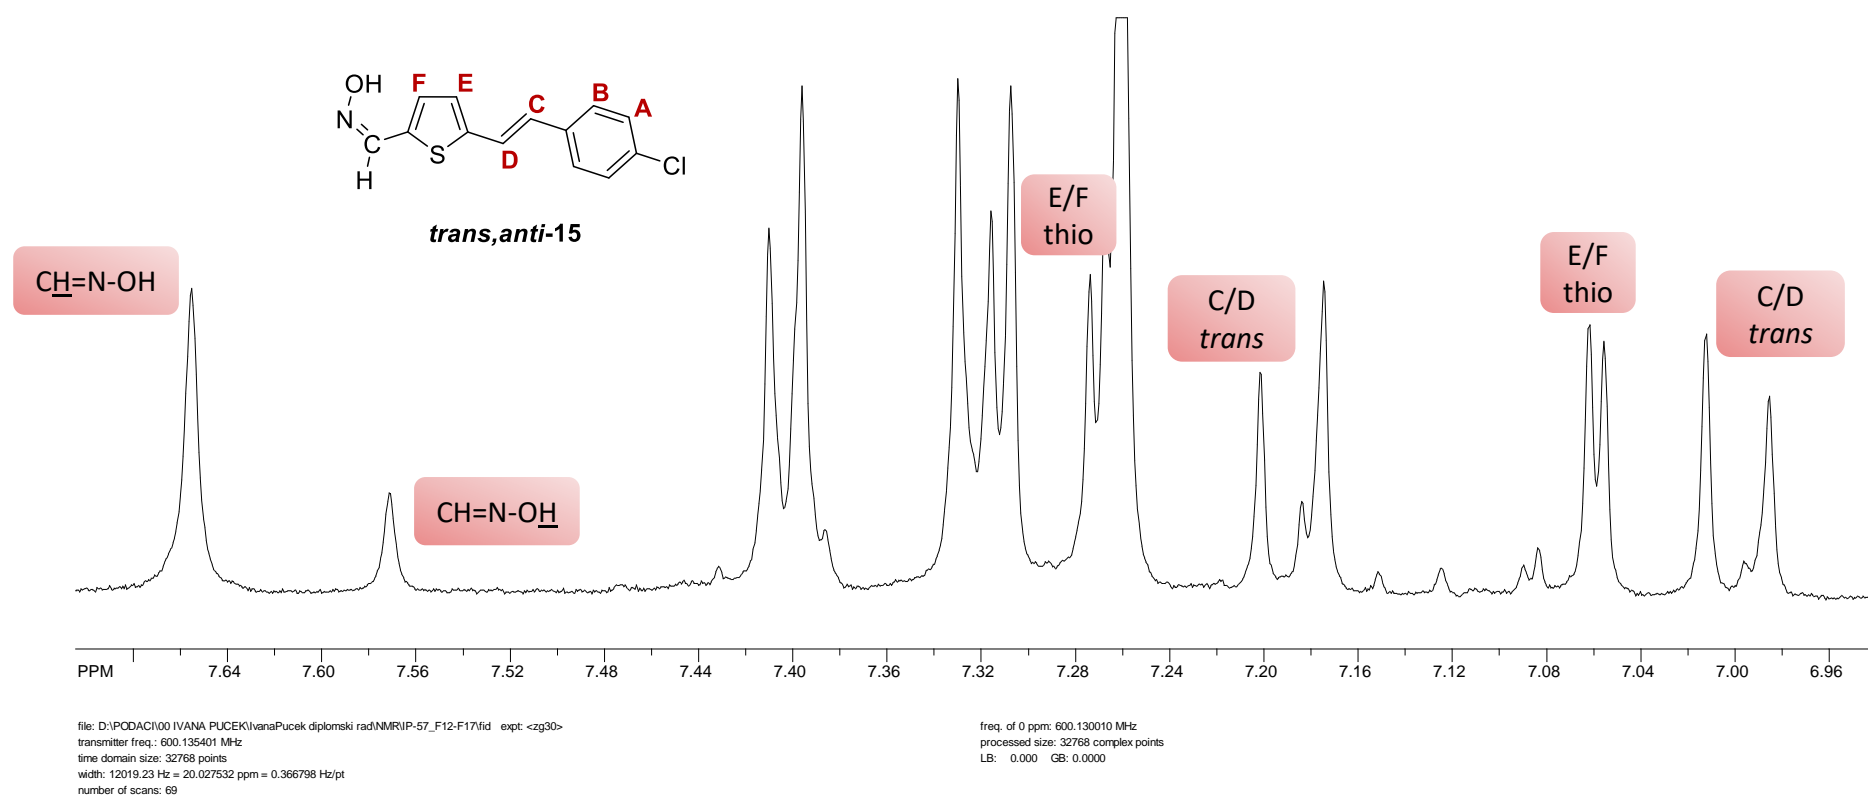

**$^{13}\text{C}$  NMR spectrum (150 MHz,  $\text{CDCl}_3$ ) of *trans,anti*-5-(4-chlorostyryl)thiophene-2-carbaldehyde oxime (*trans,anti*-15)**

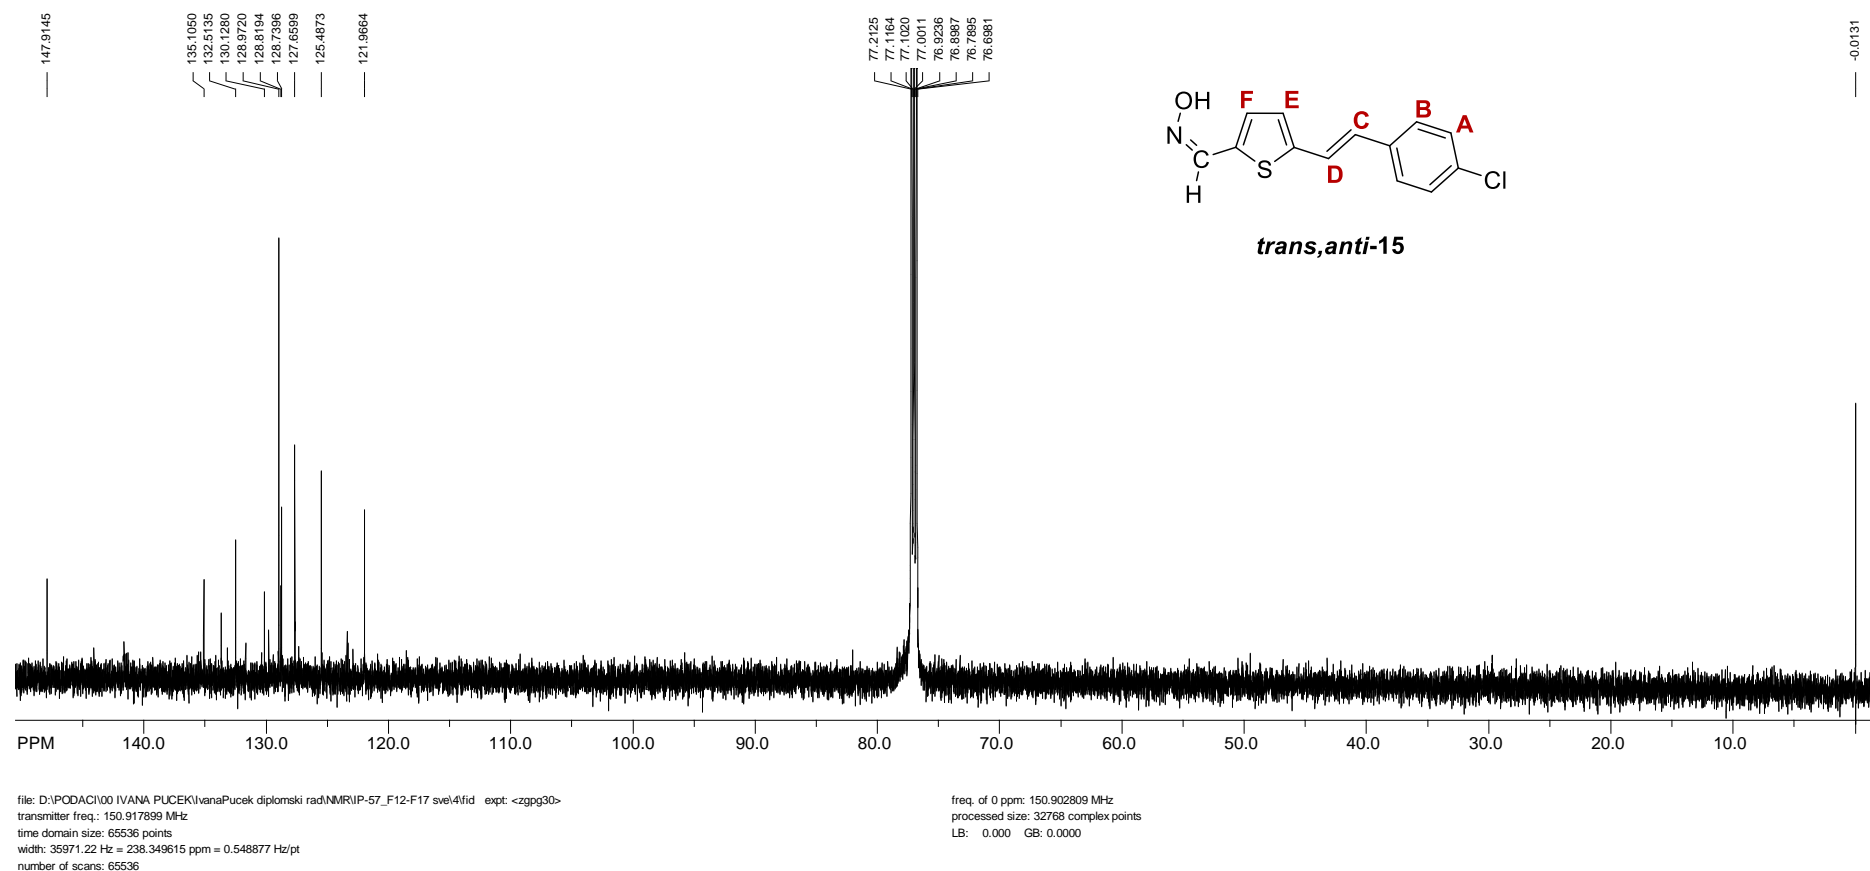

# Mass spectra and HRMS analysis of the mixture of geometrical isomers of 5-(4-chlorostyryl)thiophene-2-carbaldehyde oxime (15)

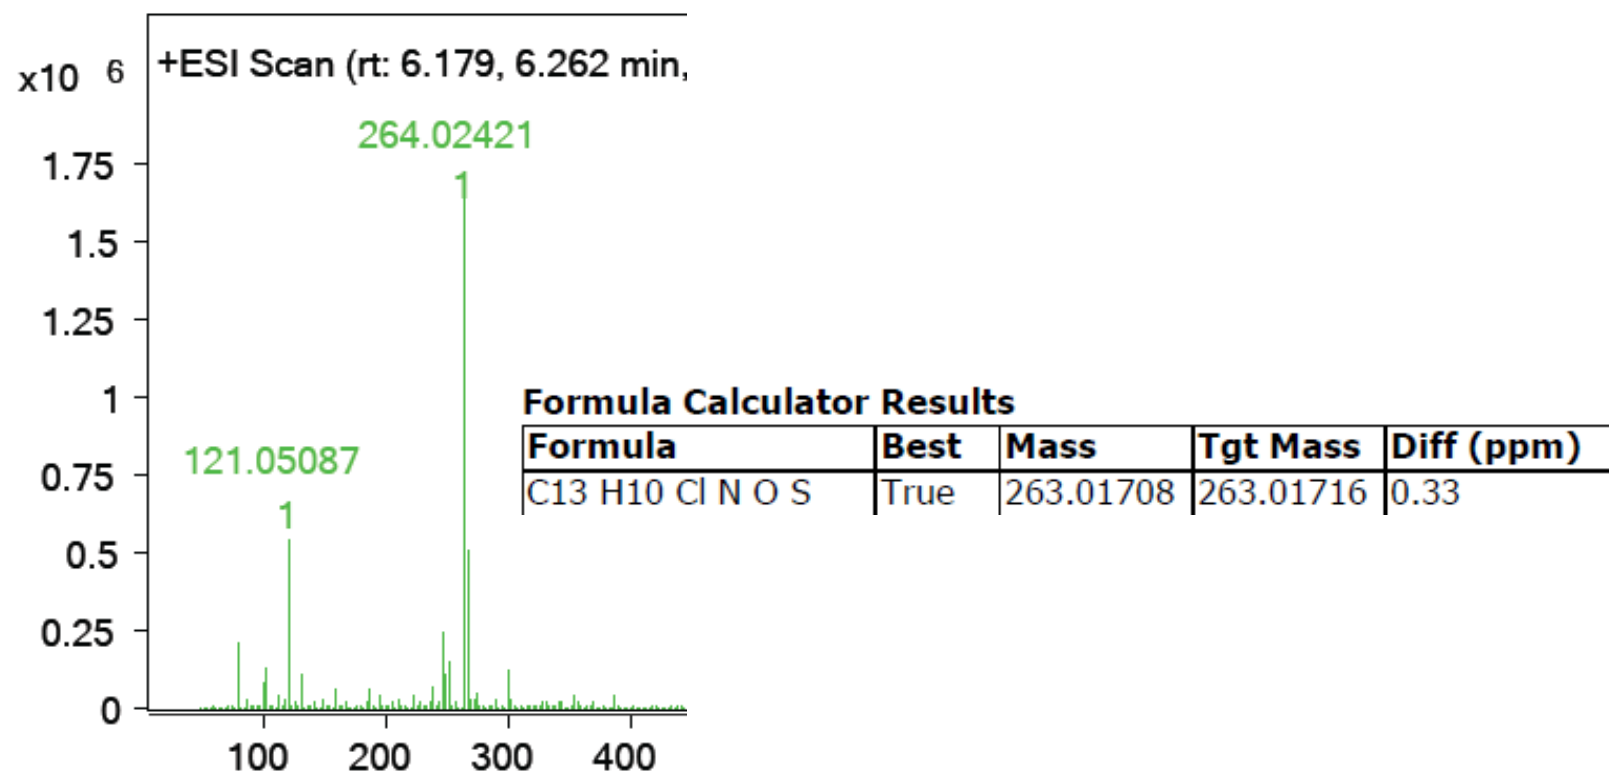

**<sup>1</sup>H NMR spectrum (600 MHz, CDCl<sub>3</sub>) of *cis,syn*-4-(2-(5-((hydroxyimino)methyl)thiophen-2-yl)vinyl)benzonitrile (*cis,syn*-16) in the mixture with *trans,syn*-16**

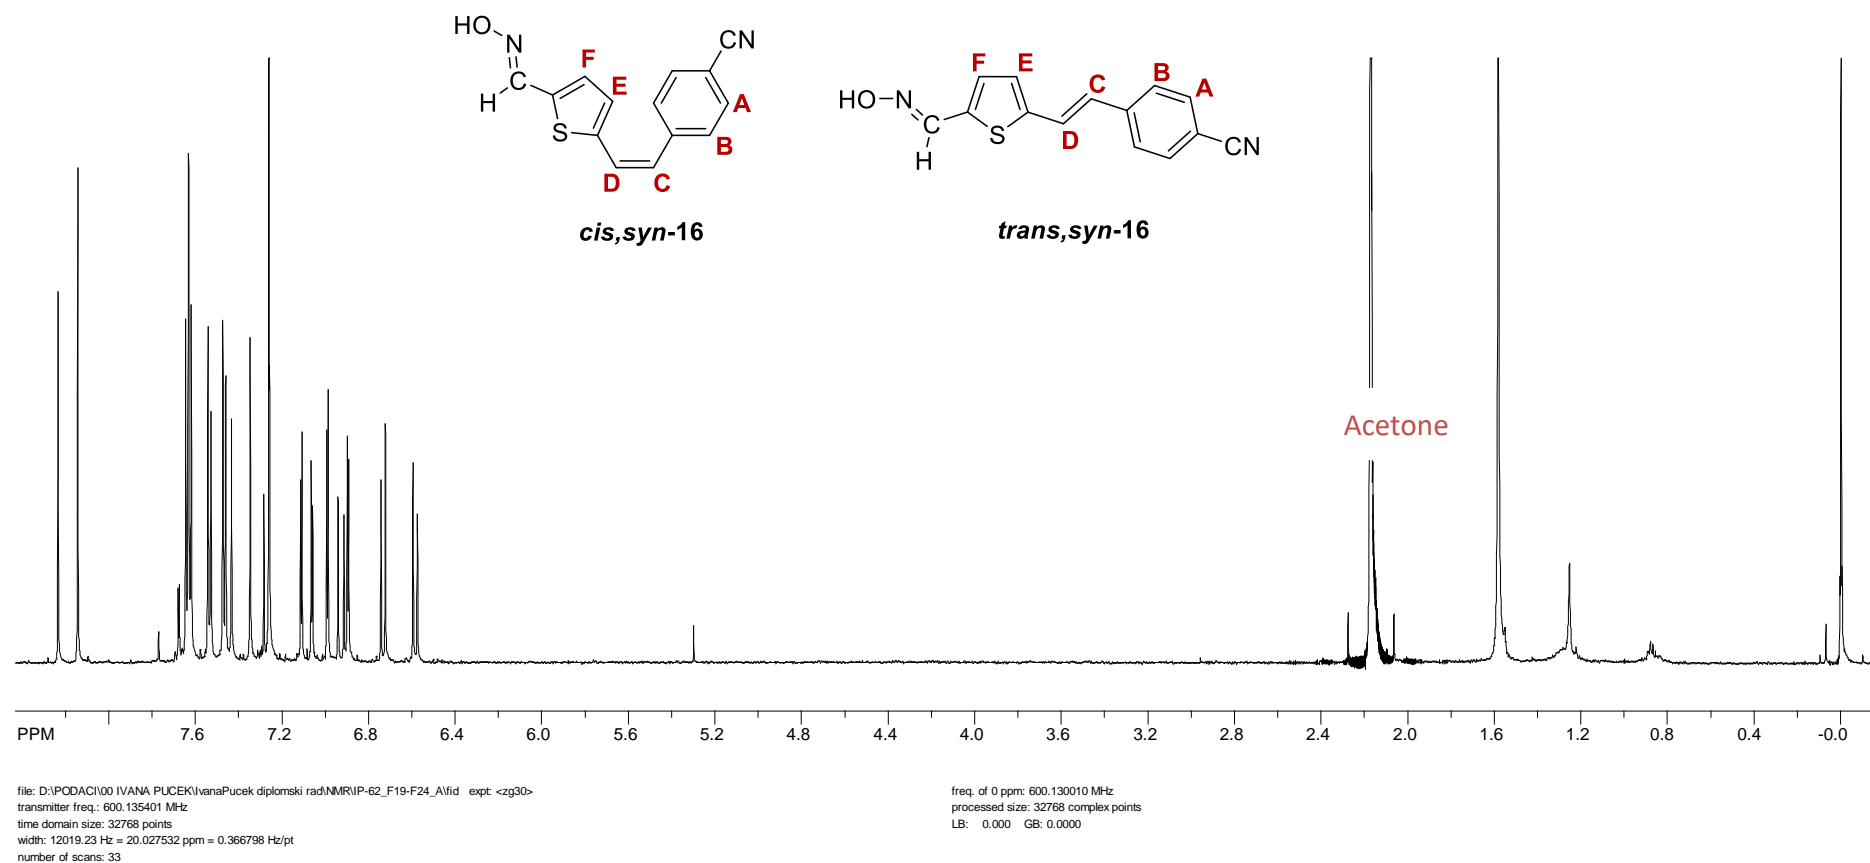

A part of the  $^1\text{H}$  NMR spectrum (600 MHz,  $\text{CDCl}_3$ ) of *cis,syn*-4-(2-(5-((hydroxyimino)methyl)thiophen-2-yl)vinyl)benzonitrile (*cis,syn*-16) in the mixture with *trans,syn*-16

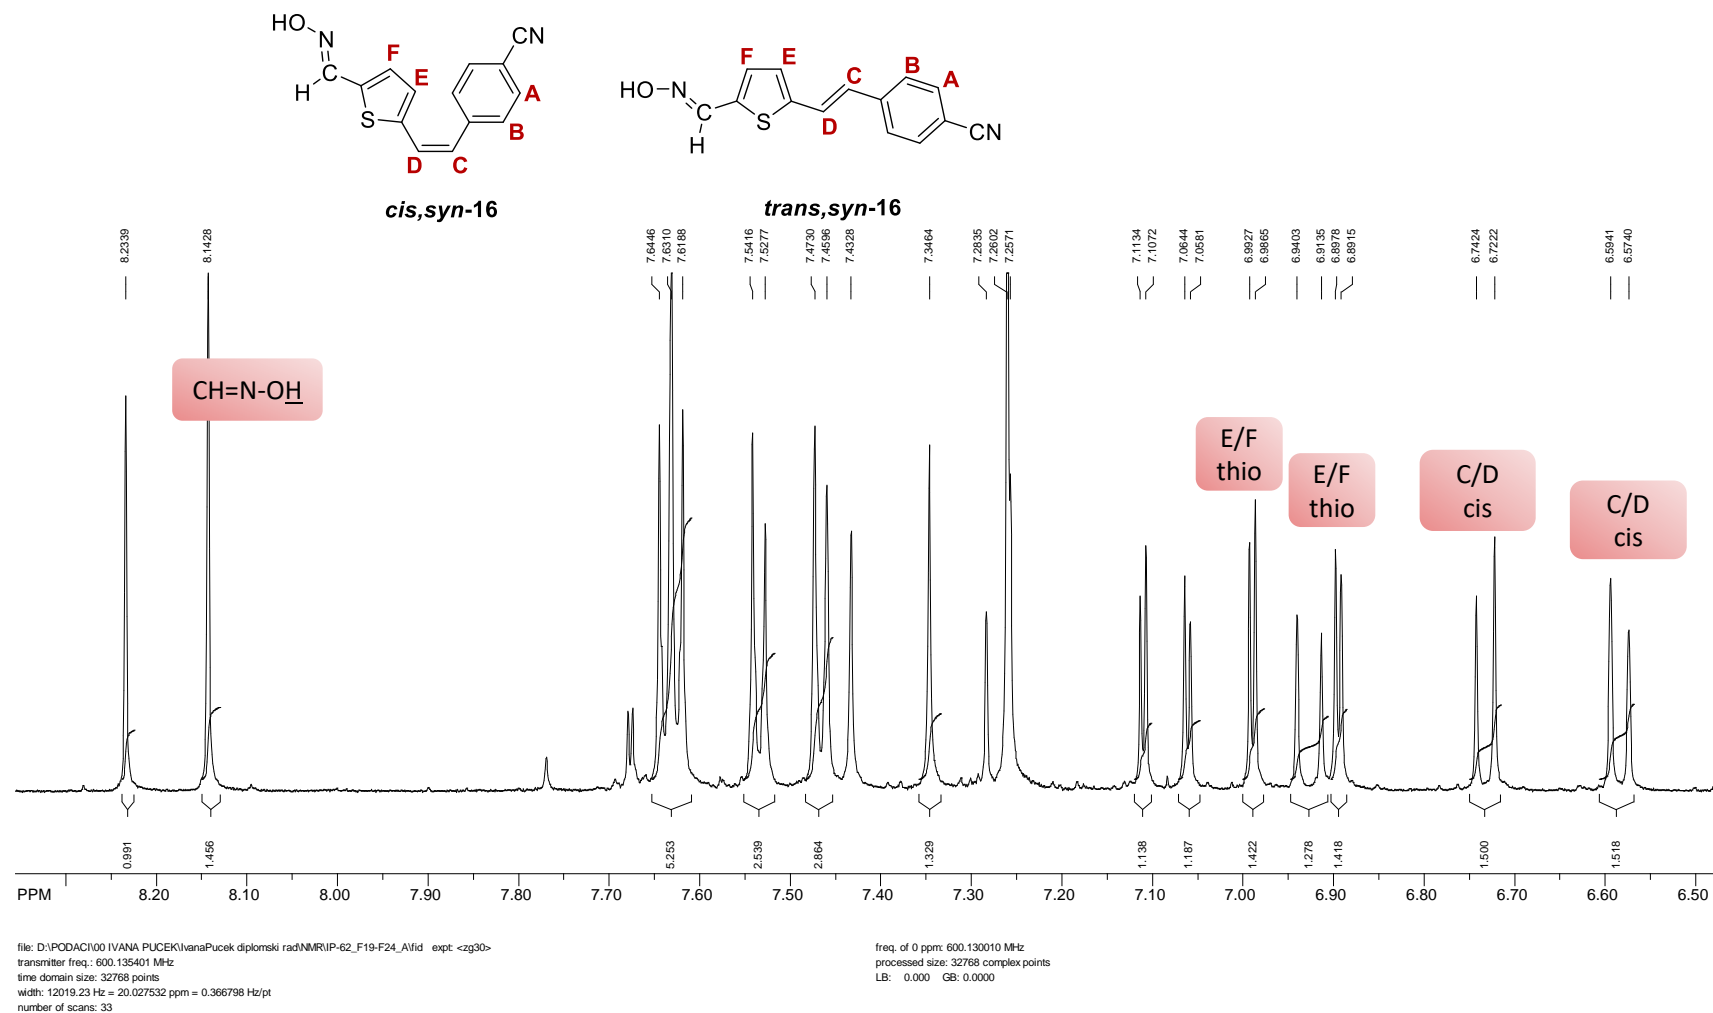

**<sup>1</sup>H NMR spectrum (600 MHz, CDCl<sub>3</sub>) of *trans,syn*-4-(2-(5-((hydroxyimino)methyl)thiophen-2-yl)vinyl)benzonitrile (*trans,syn*-16) with traces of *cis,syn*-16**

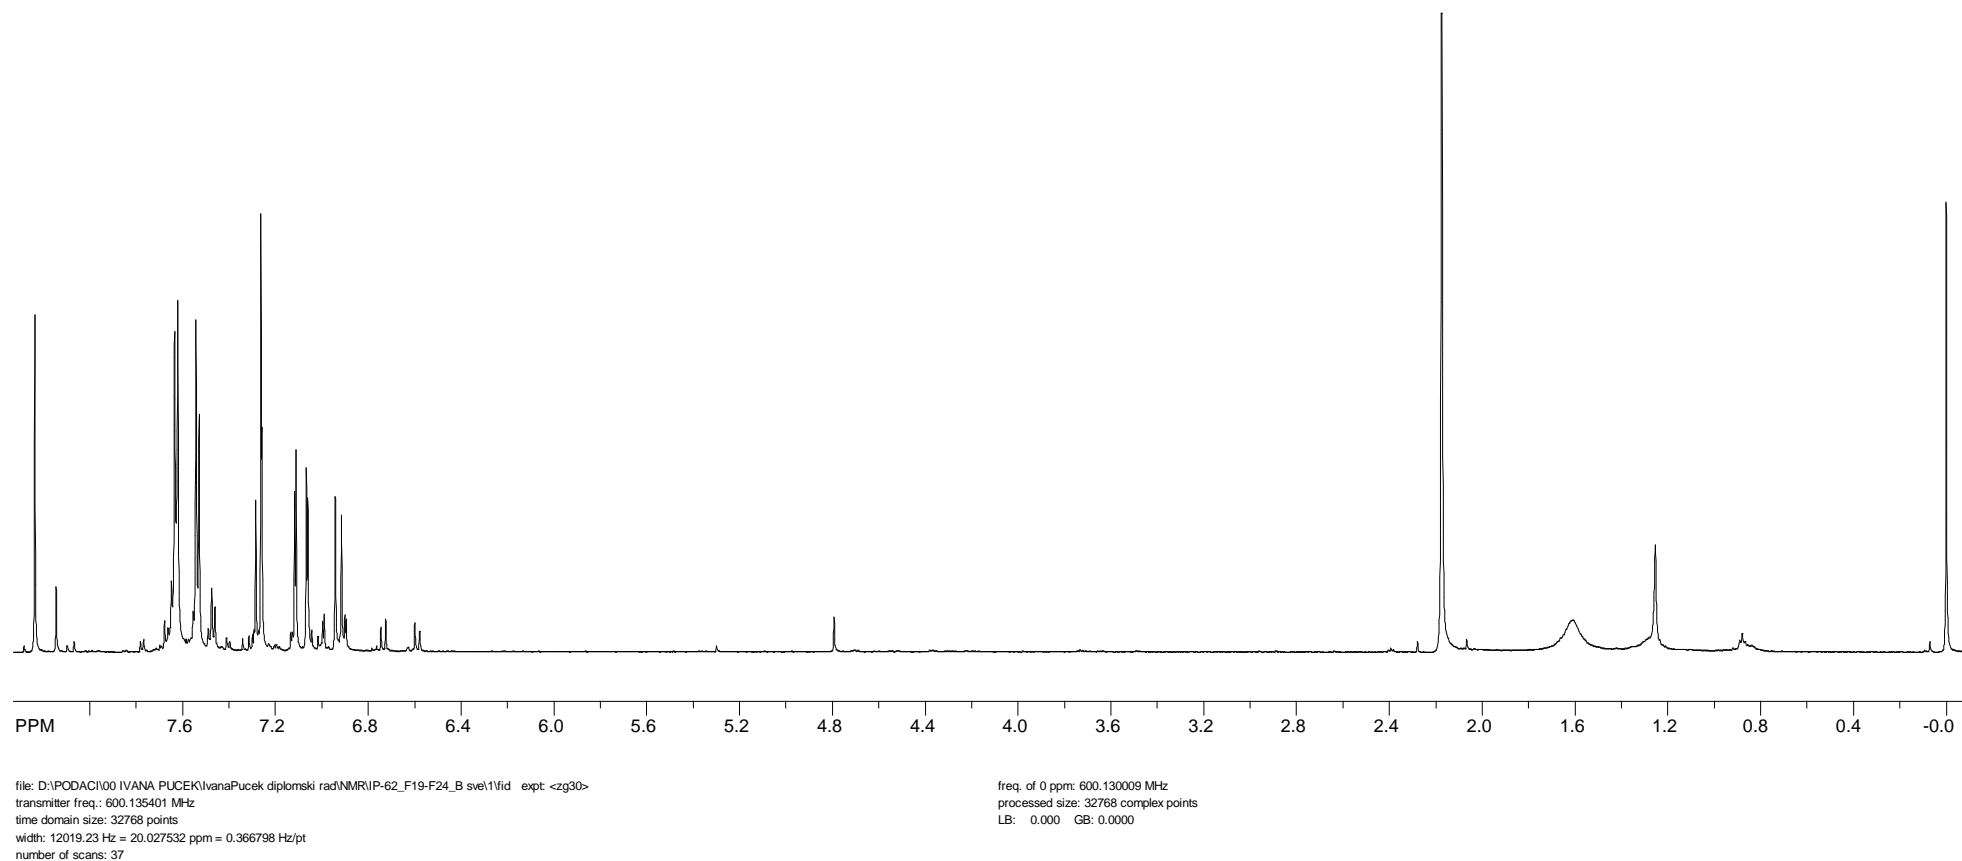

**A part of the  $^1\text{H}$  NMR spectrum (600 MHz,  $\text{CDCl}_3$ ) of *trans,syn*-4-(2-(5-((hydroxyimino)methyl)thiophen-2-yl)vinyl)benzonitrile (*trans,syn*-16) with traces of *cis,syn*-16**

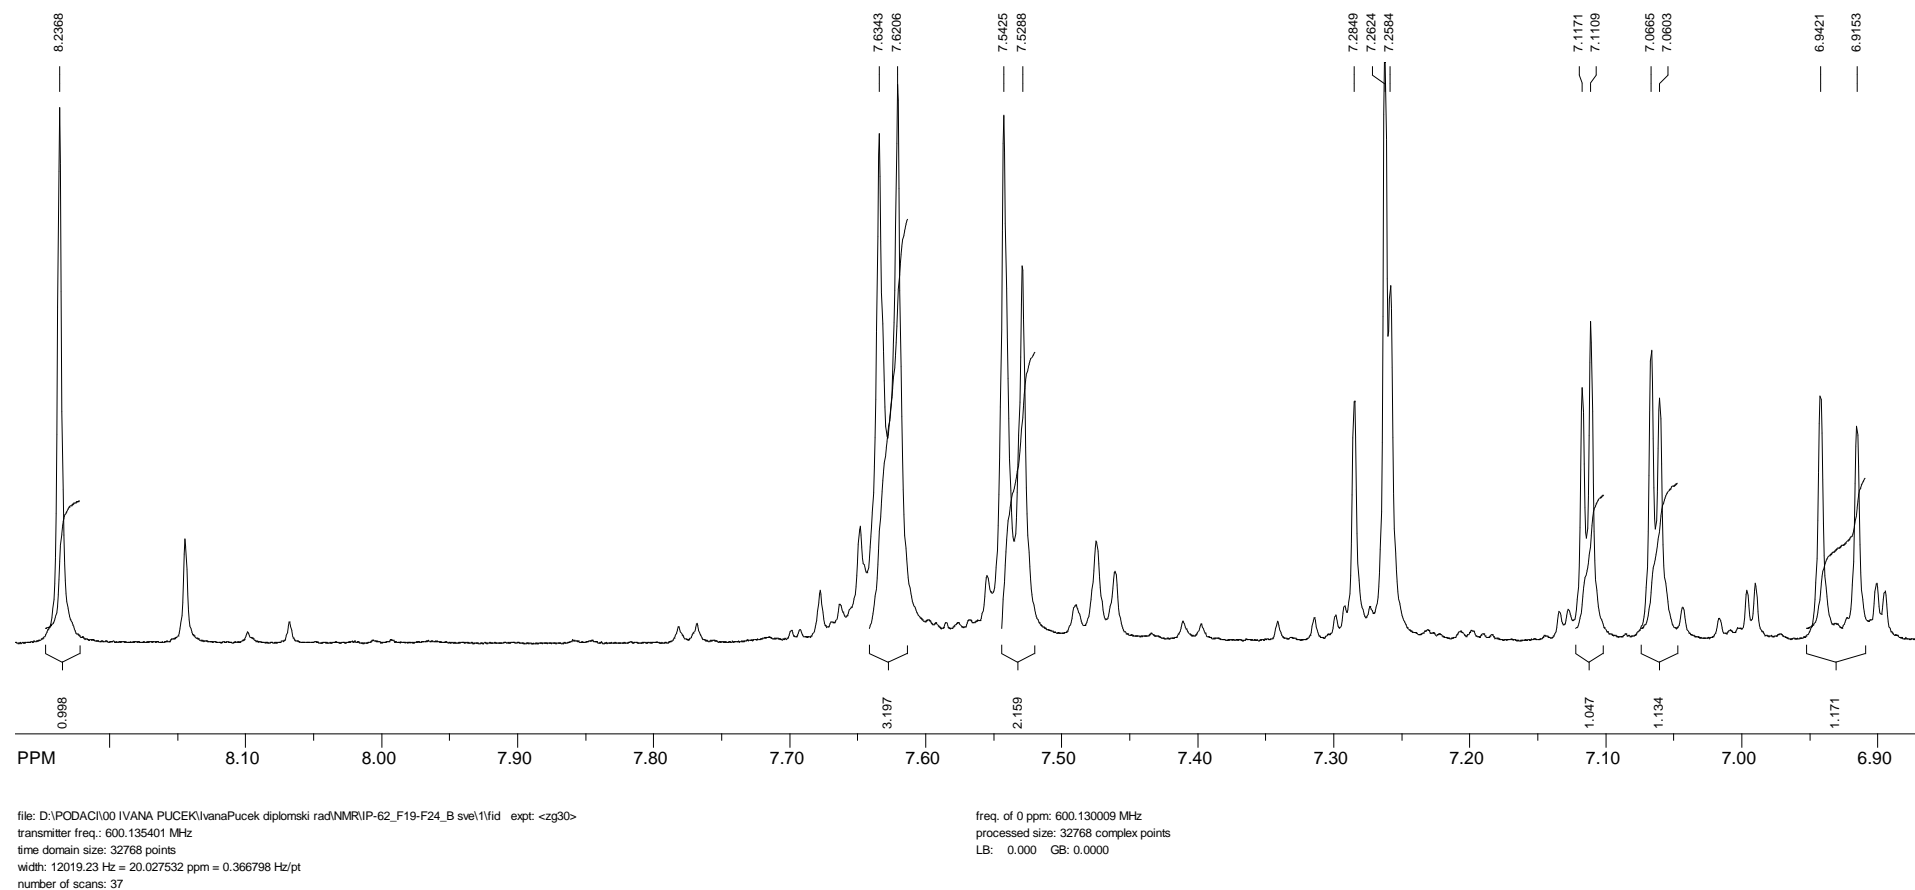

**<sup>13</sup>C NMR spectrum (150 MHz, CDCl<sub>3</sub>) of *trans,syn*-4-(2-(5-((hydroxyimino)methyl)thiophen-2-yl)vinyl)benzonitrile (*trans,syn*-16)**

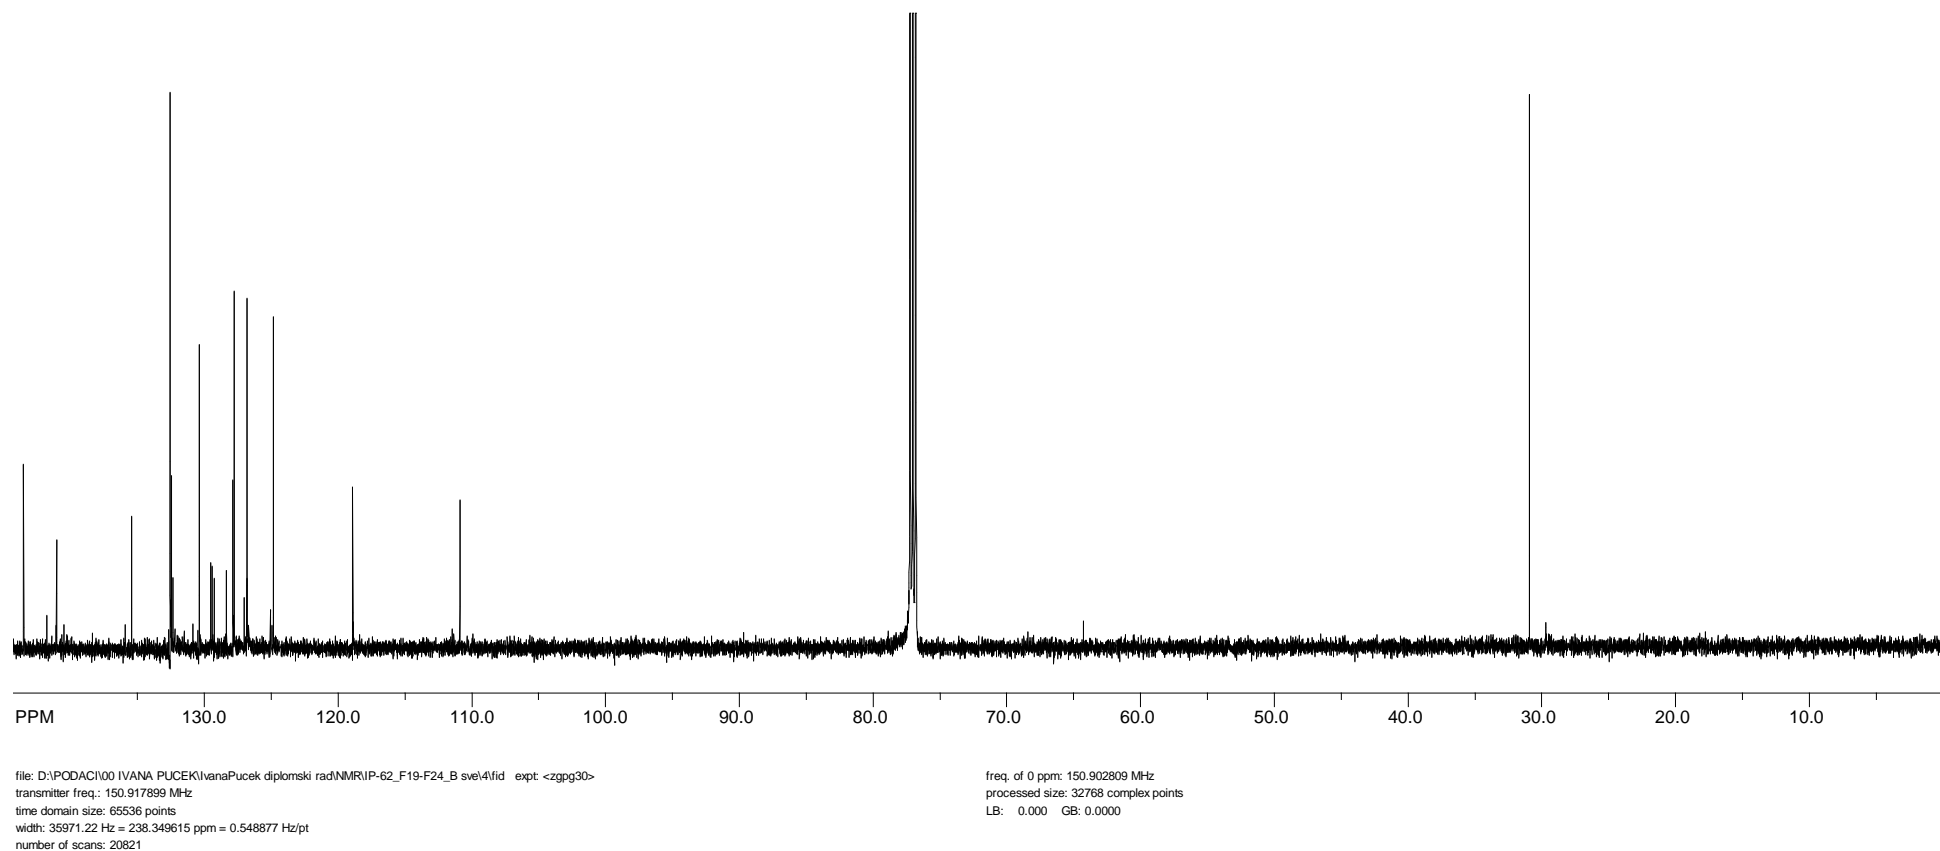



**<sup>1</sup>H NMR spectrum (600 MHz, CDCl<sub>3</sub>) of *cis,anti*-4-(2-(5-((hydroxyimino)methyl)thiophen-2-yl)vinyl)benzonitrile (*cis,anti*-16) with traces of other isomers**

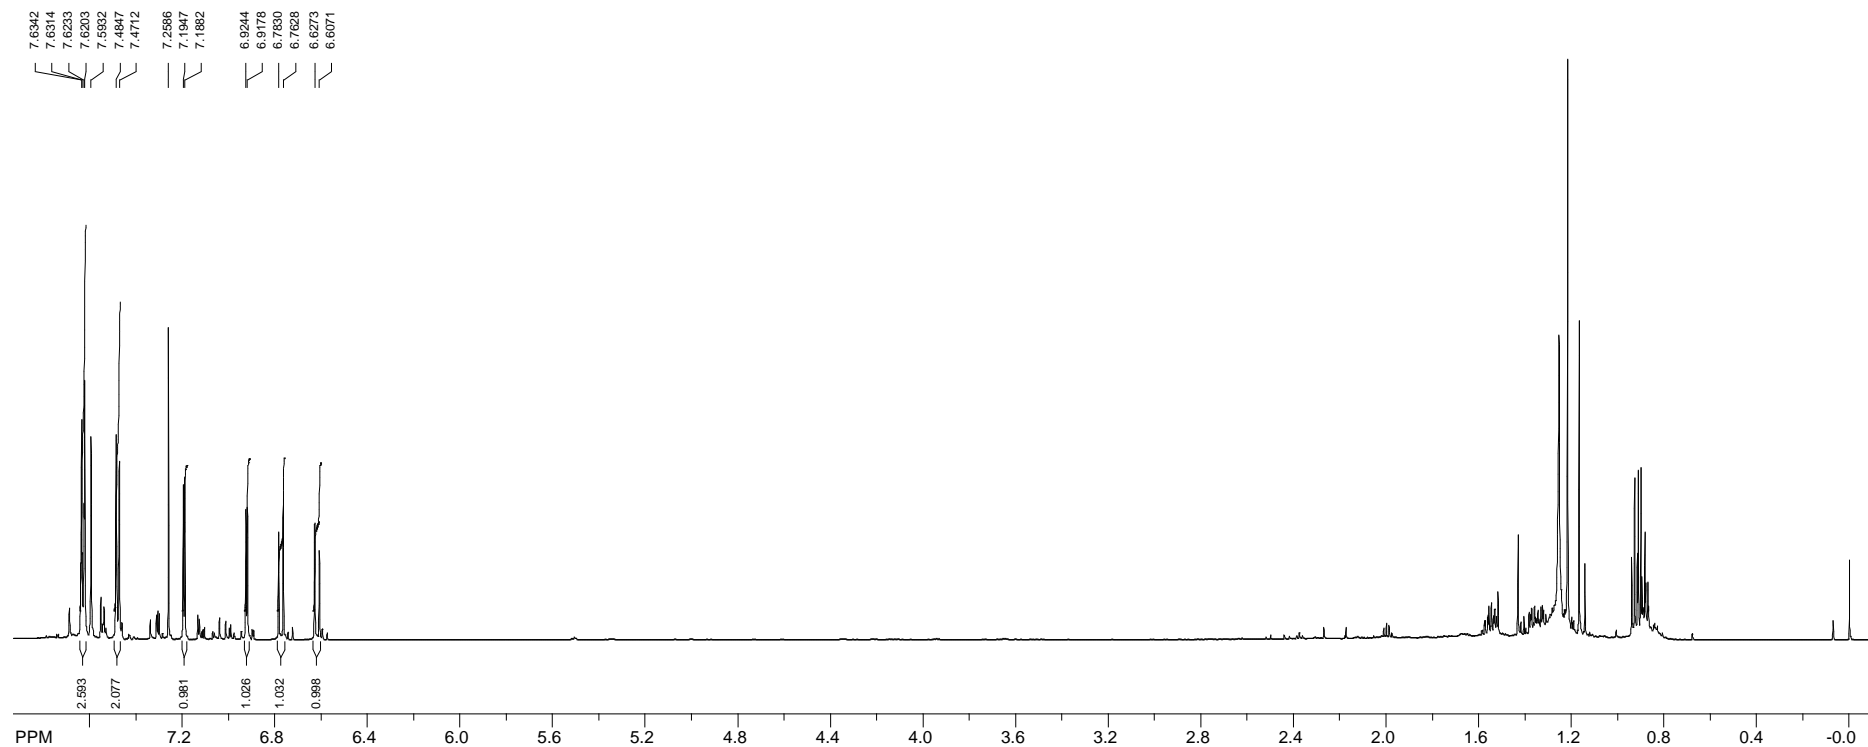

file: D:\SURADNJE\ZRINKA KOVARIK\00 ZK Oximes\SupportingInformation\oksimi cisti spektri MD\oksimi\MD-88(46-54)(2-7) najbolji koji imam od CNfid expit: <zg30>  
transmitter freq.: 600.135401 MHz  
time domain size: 32768 points  
width: 12019.23 Hz = 20.027532 ppm = 0.366798 Hz/pt  
number of scans: 27

freq. of 0 ppm: 600.130010 MHz  
processed size: 32768 complex points  
LB: 0.000 GB: 0.0000

**A part of the  $^1\text{H}$  NMR spectrum (600 MHz,  $\text{CDCl}_3$ ) of *cis,anti*-4-(2-(5-((hydroxyimino)methyl)thiophen-2-yl)vinyl)benzonitrile (*cis,anti*-16) with traces of other isomers**

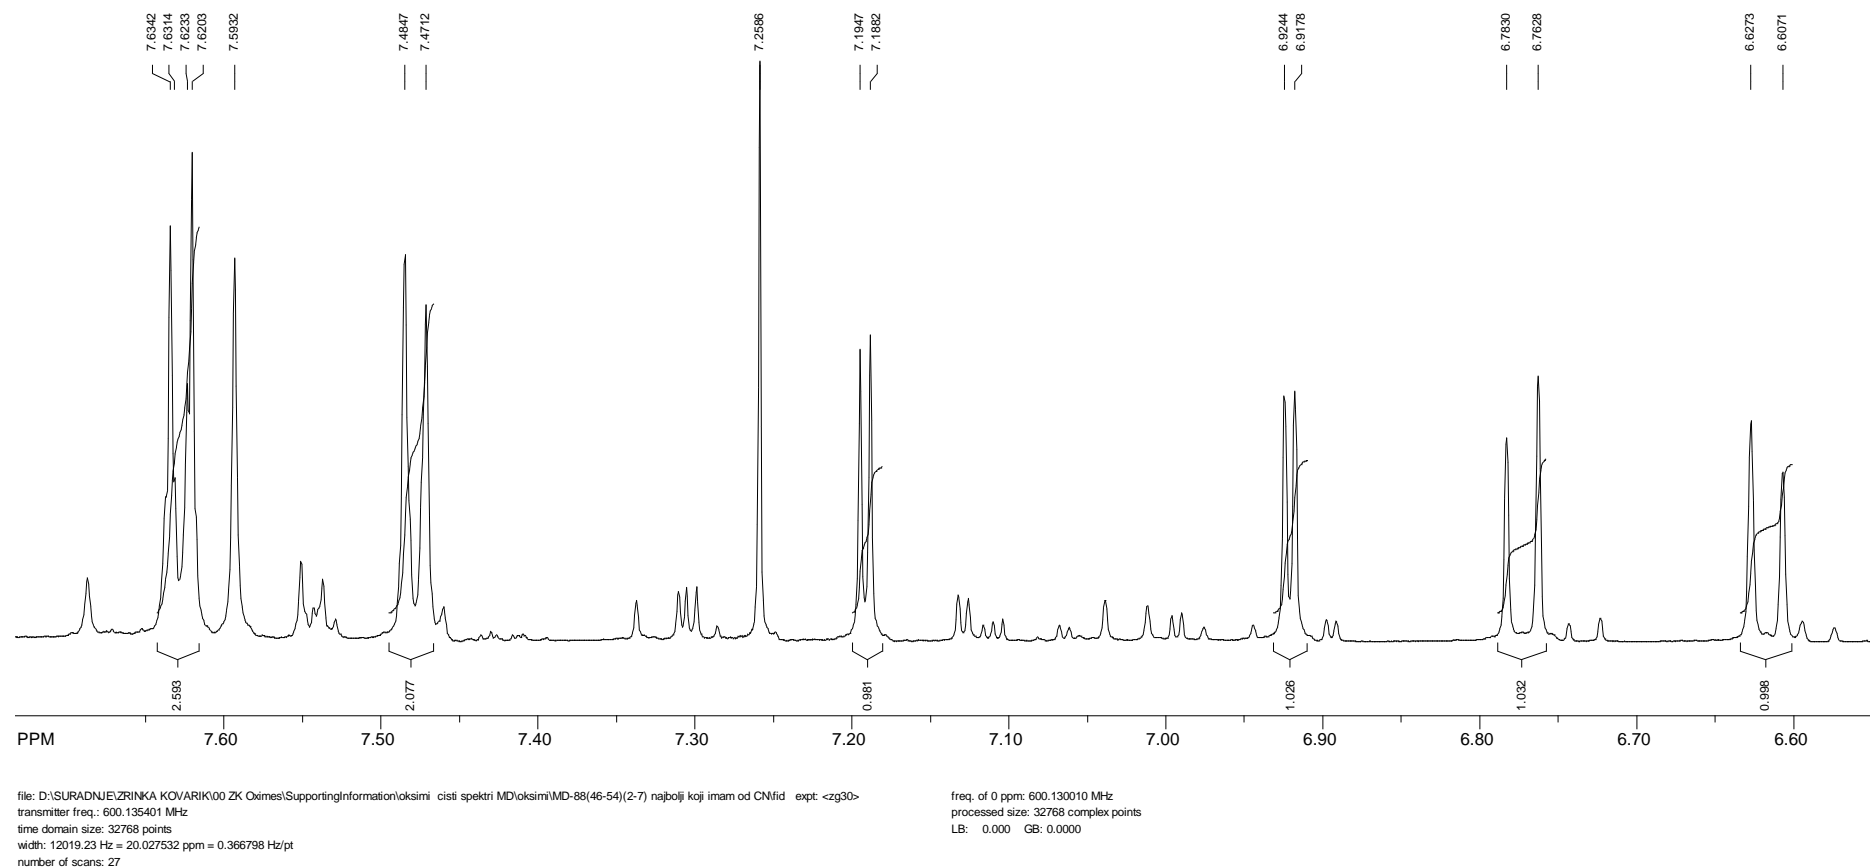

**<sup>1</sup>H NMR spectrum (600 MHz, CDCl<sub>3</sub> + CD<sub>3</sub>OD) of *trans,anti*-4-(2-(5-((hydroxyimino)methyl)thiophen-2-yl)vinyl)benzonitrile (*trans,anti*-16)**

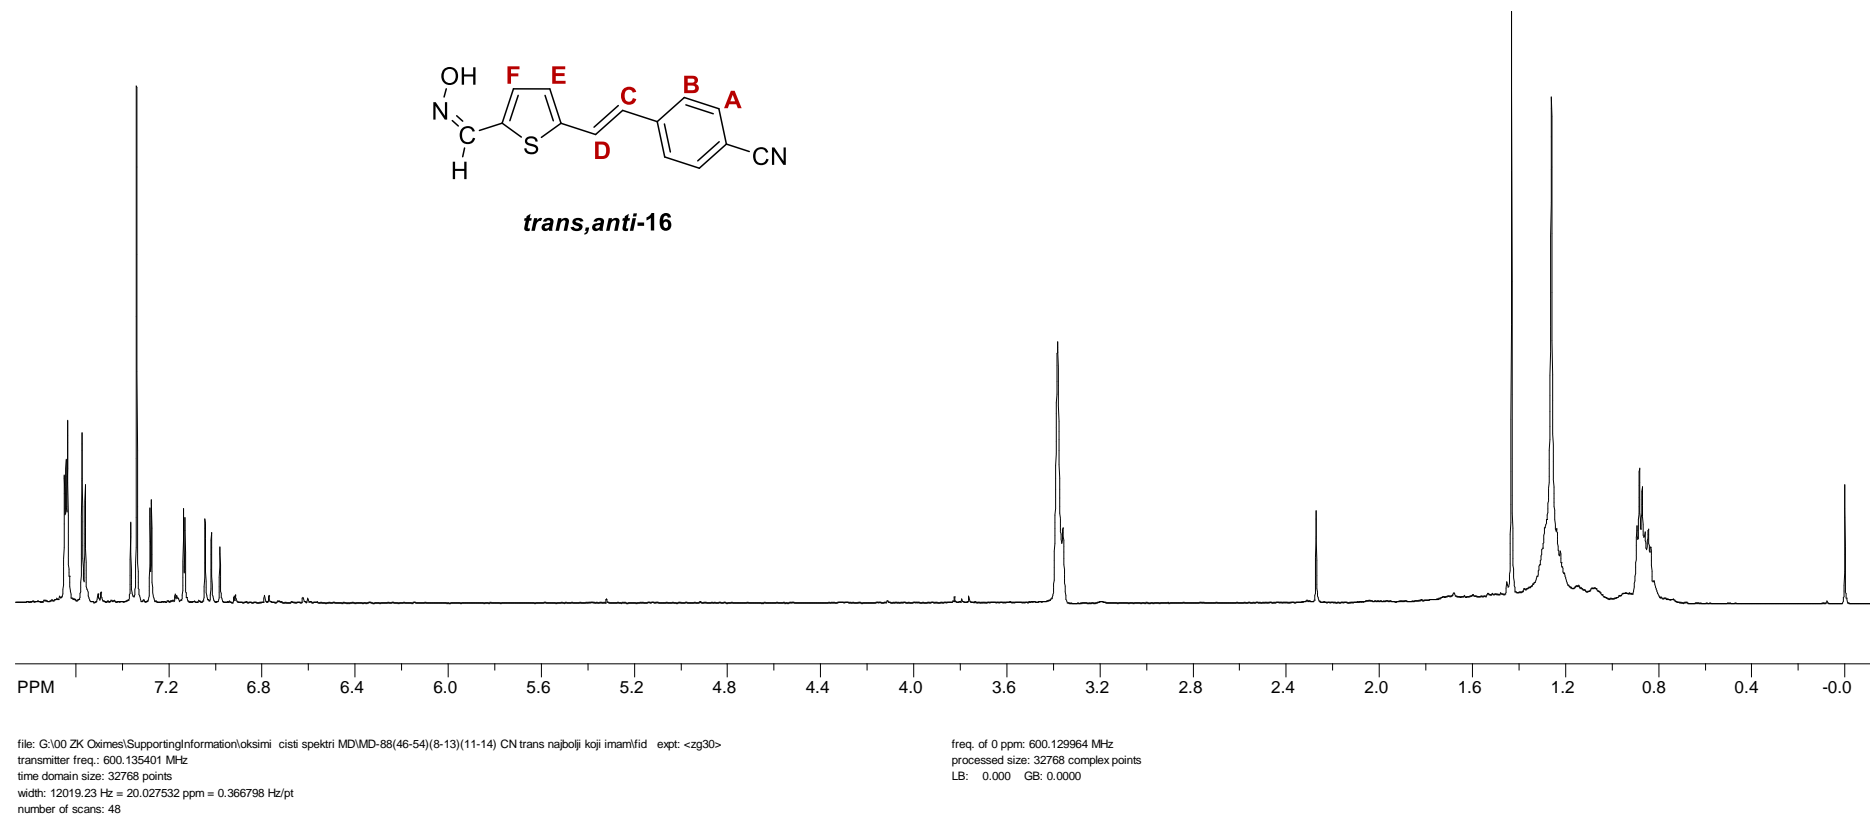

A part of the  $^1\text{H}$  NMR spectrum (600 MHz,  $\text{CDCl}_3 + \text{CD}_3\text{OD}$ ) of *trans,anti*-4-(2-(5-((hydroxyimino)methyl)thiophen-2-yl)vinyl)benzonitrile (*trans,anti*-16)

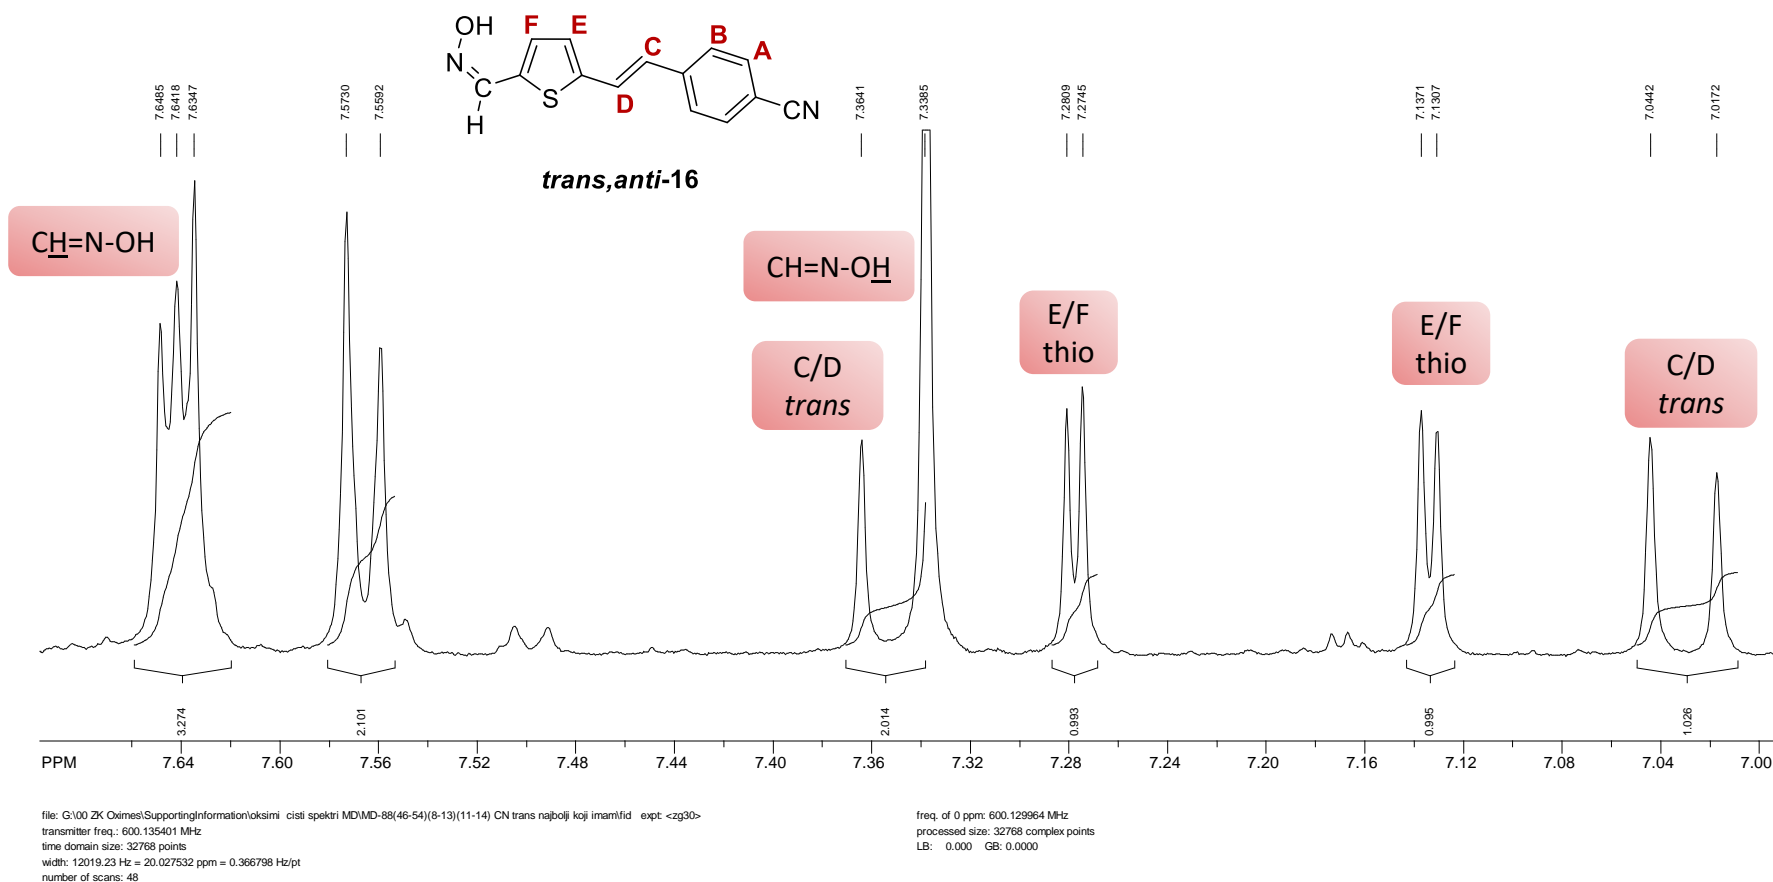

**$^{13}\text{C}$  NMR (APT) spectrum (150 MHz,  $\text{CDCl}_3$  +  $\text{CD}_3\text{OD}$ ) of *trans,anti*-4-(2-(5-((hydroxyimino)methyl)thiophen-2-yl)vinyl)benzonitrile (*trans,anti*-16)**

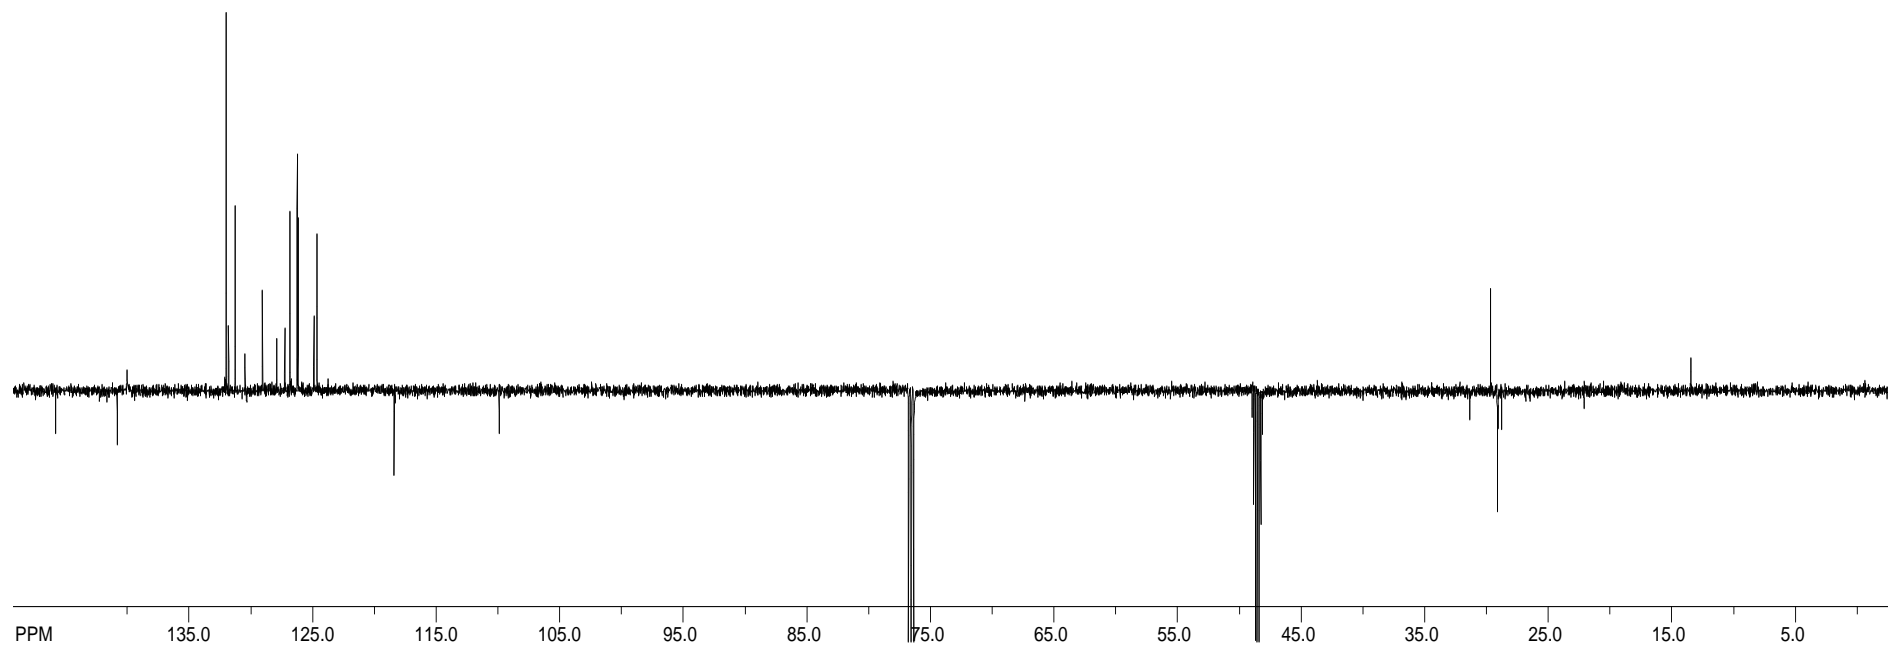

file: G:\00 ZX Oximes\SupportingInformation\oksimi\_cisti spektri MD\MD-88(46-54)(8-13)(11-14) APT\fid exp: <jmod>  
transmitter freq.: 150.917899 MHz  
time domain size: 65536 points  
width: 39370.08 Hz = 260.870838 ppm = 0.600740 Hz/pt  
number of scans: 31419

freq. of 0 ppm: 150.902884 MHz  
processed size: 32768 complex points  
LB: 0.000 GB: 0.0000

**Mass spectra and HRMS analysis of the mixture of geometrical isomers of 4-(2-(5-hydroxyiminomethyl)thiophen-2-yl)vinyl)benzonitrile (16)**

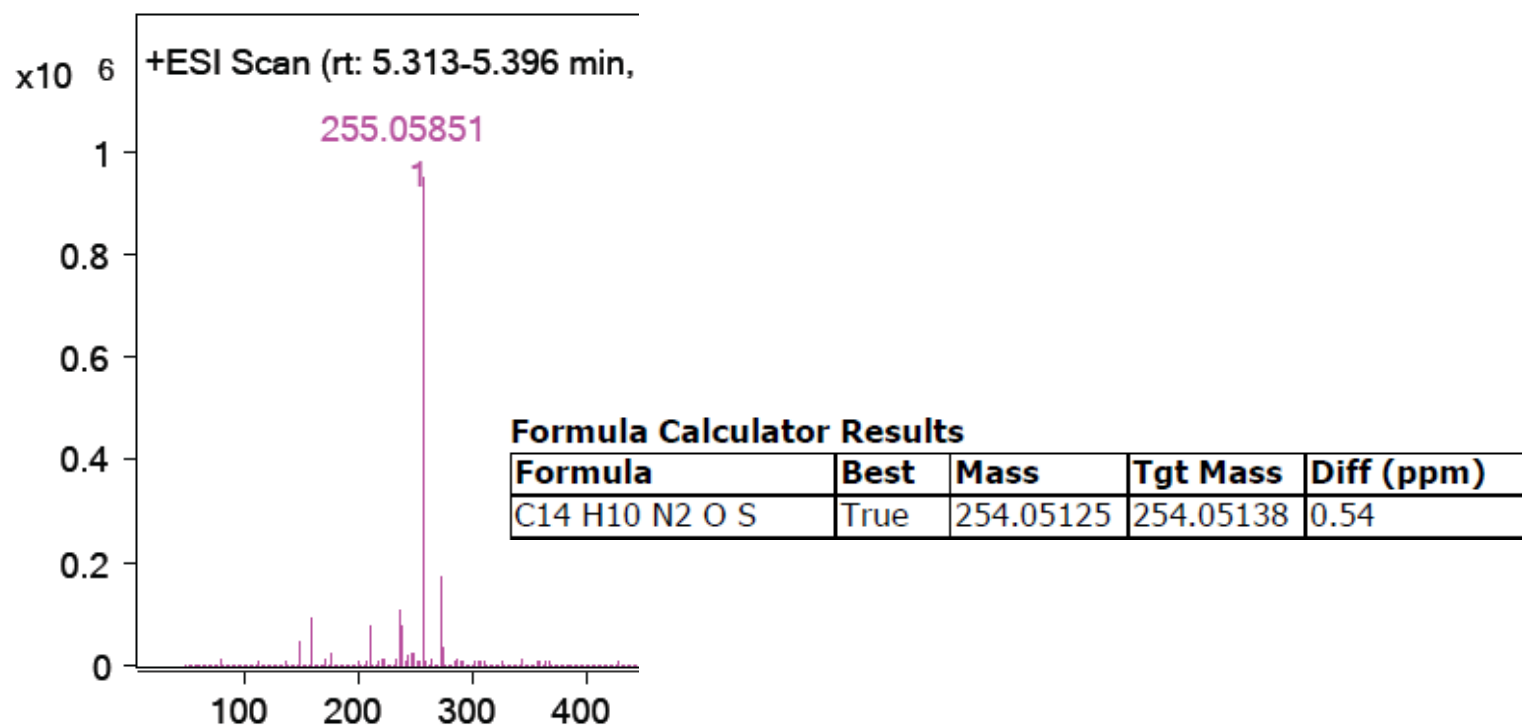

**<sup>1</sup>H NMR spectrum (600 MHz, CDCl<sub>3</sub>) of *trans,syn*-5-(4-nitrostyryl)thiophene-2-carbaldehyde oxime (*trans,syn*-17)**

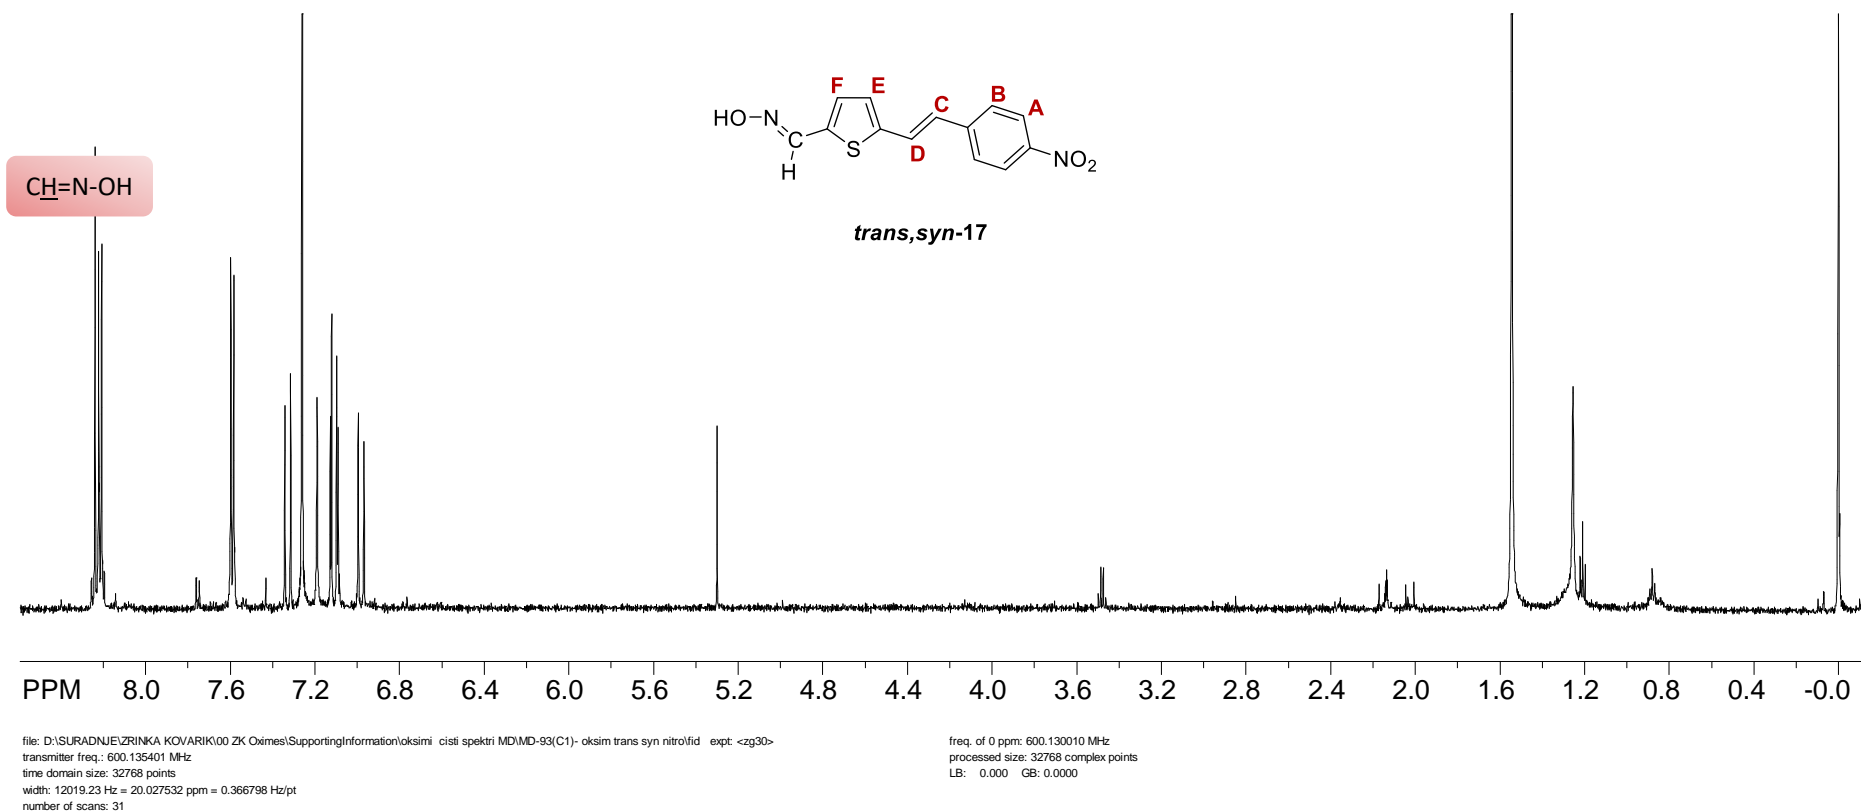

A part of the  $^1\text{H}$  NMR spectrum (600 MHz,  $\text{CDCl}_3$ ) of *trans,syn*-5-(4-nitrostyryl)thiophene-2-carbaldehyde oxime (*trans,syn*-17)

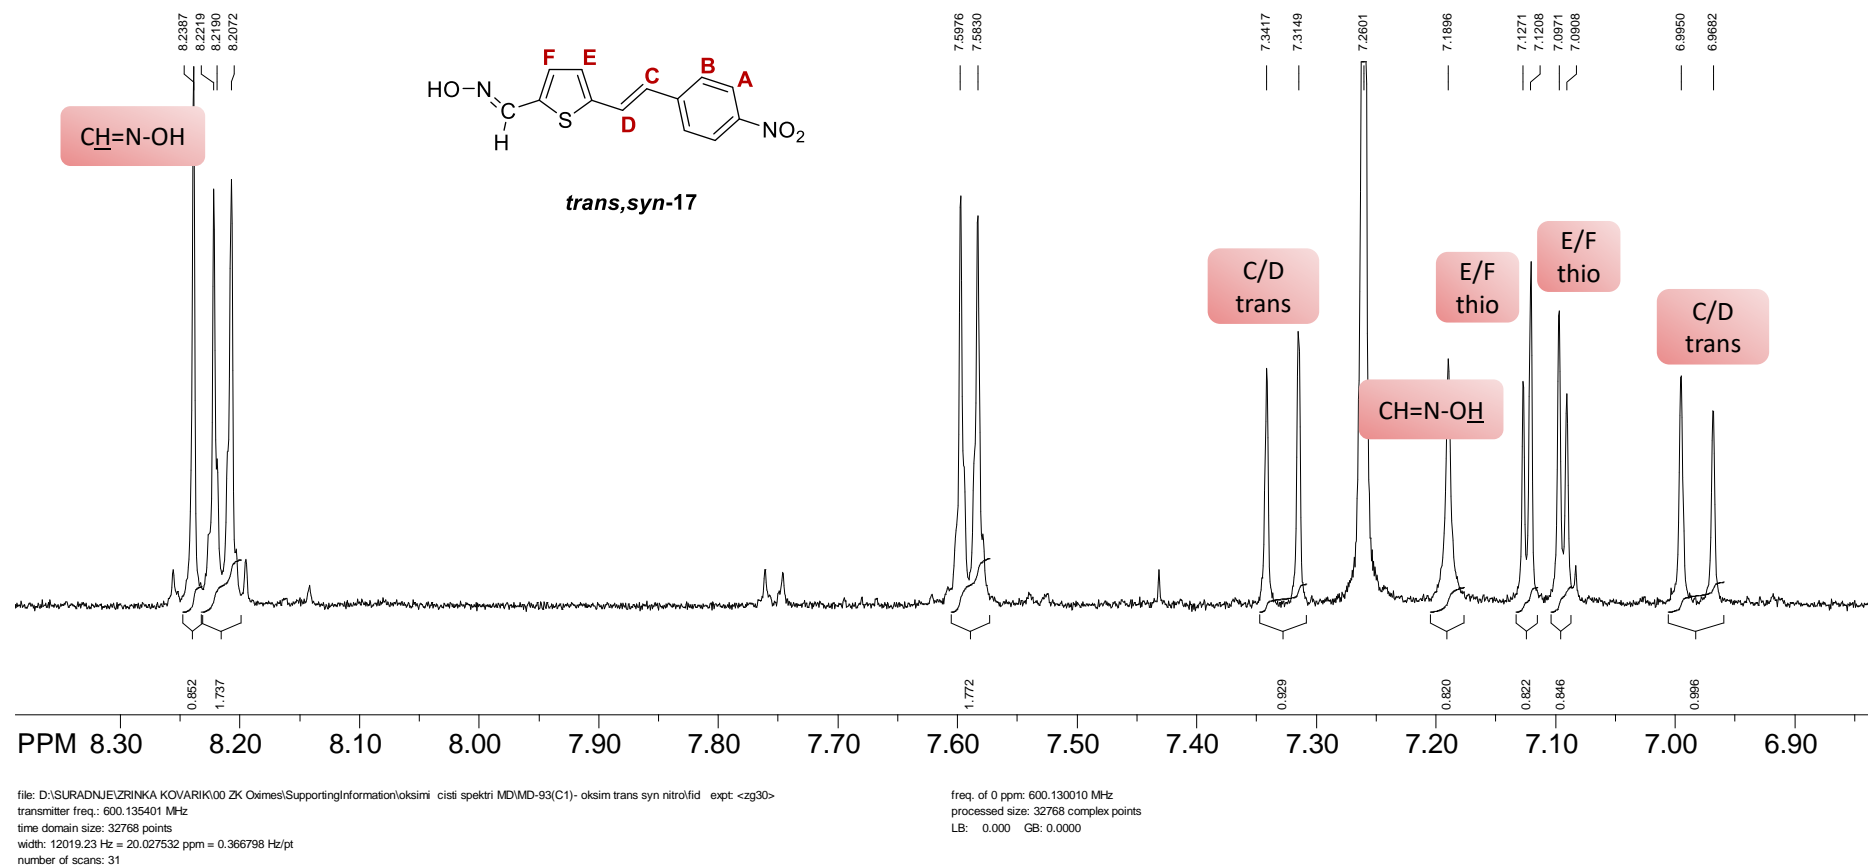



**<sup>13</sup>C NMR spectrum (150 MHz, CDCl<sub>3</sub>) of *trans,syn*-5-(4-nitrostyryl)thiophene-2-carbaldehyde oxime (*trans,syn*-17)**

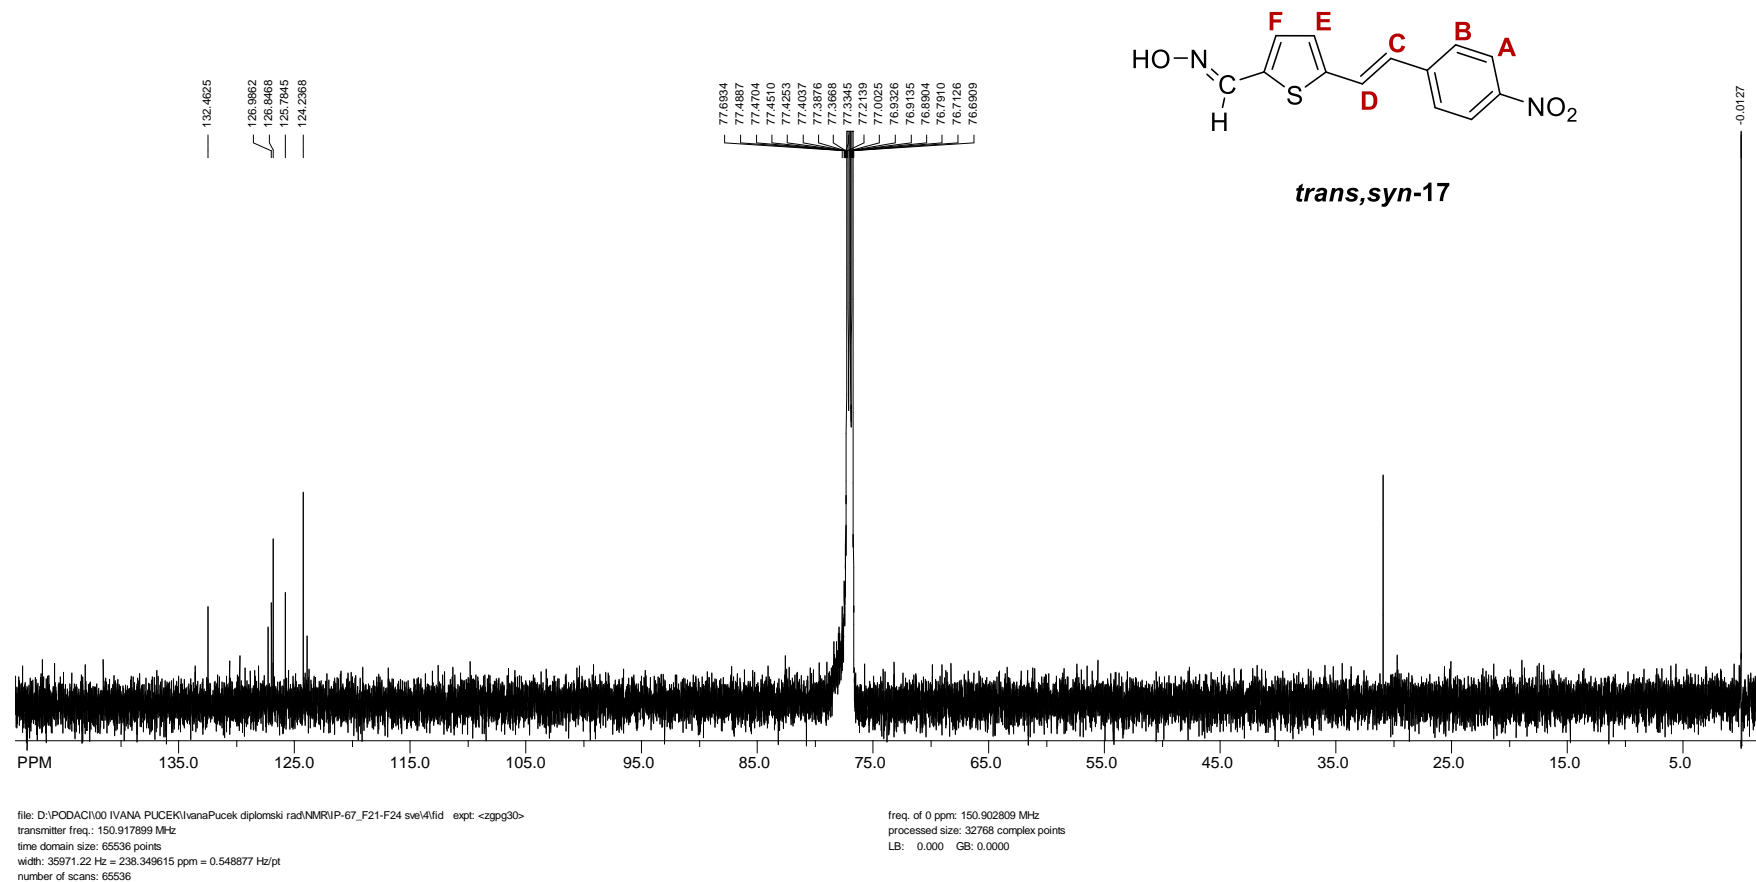

# COSY spectrum of *trans,syn*-5-(4-nitrostyryl)thiophene-2-carbaldehyde oxime (*trans,syn*-17)

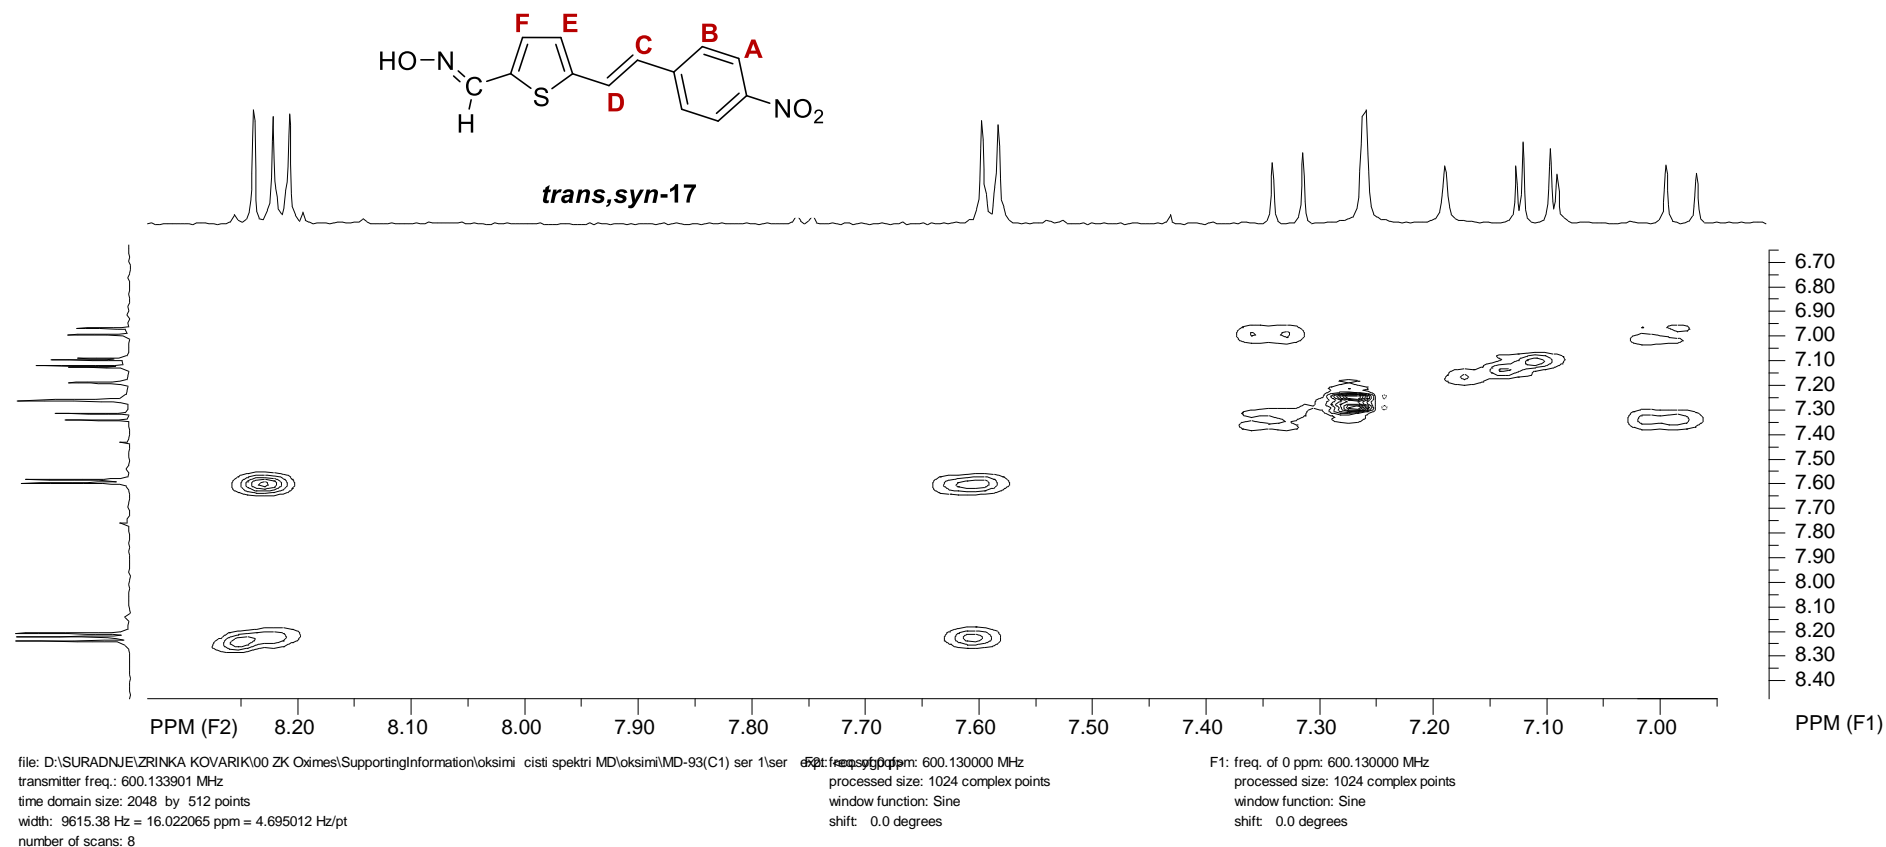

**<sup>1</sup>H NMR spectrum (600 MHz, CDCl<sub>3</sub>) of *trans,anti*-5-(4-nitrostyryl)thiophene-2-carbaldehyde oxime (*trans,anti*-17) with traces of *cis,anti*-17**

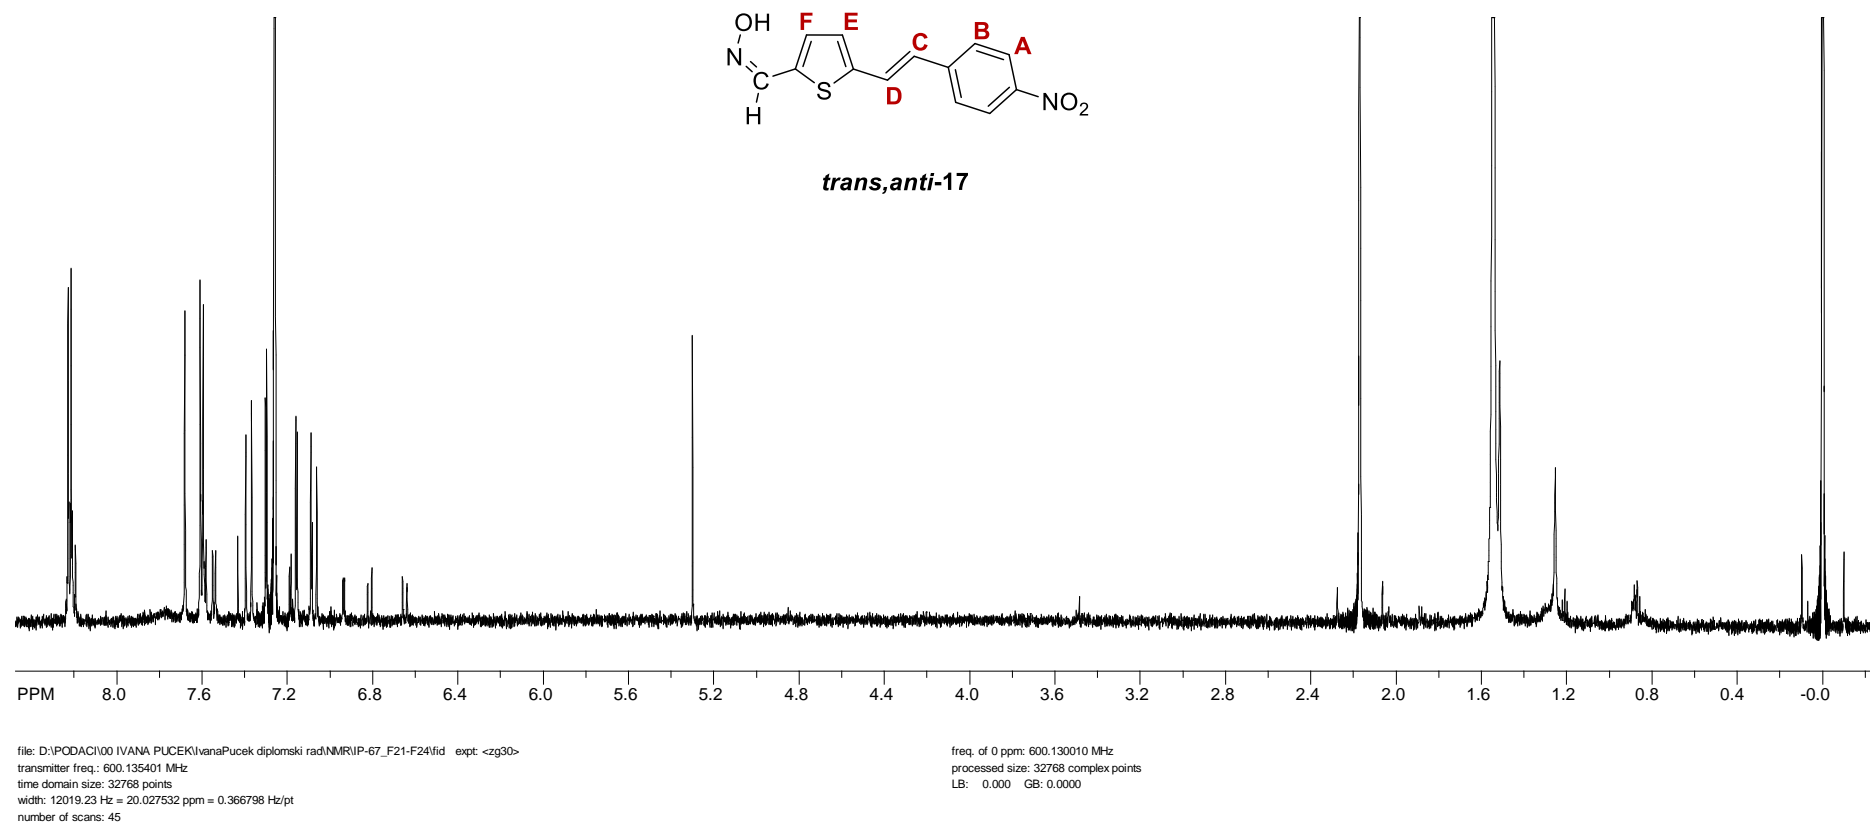

A part of the  $^1\text{H}$  NMR spectrum (600 MHz,  $\text{CDCl}_3$ ) of *trans,anti*-5-(4-nitrostyryl)thiophene-2-carbaldehyde oxime (*trans,anti*-17) with traces of *cis,anti*-17

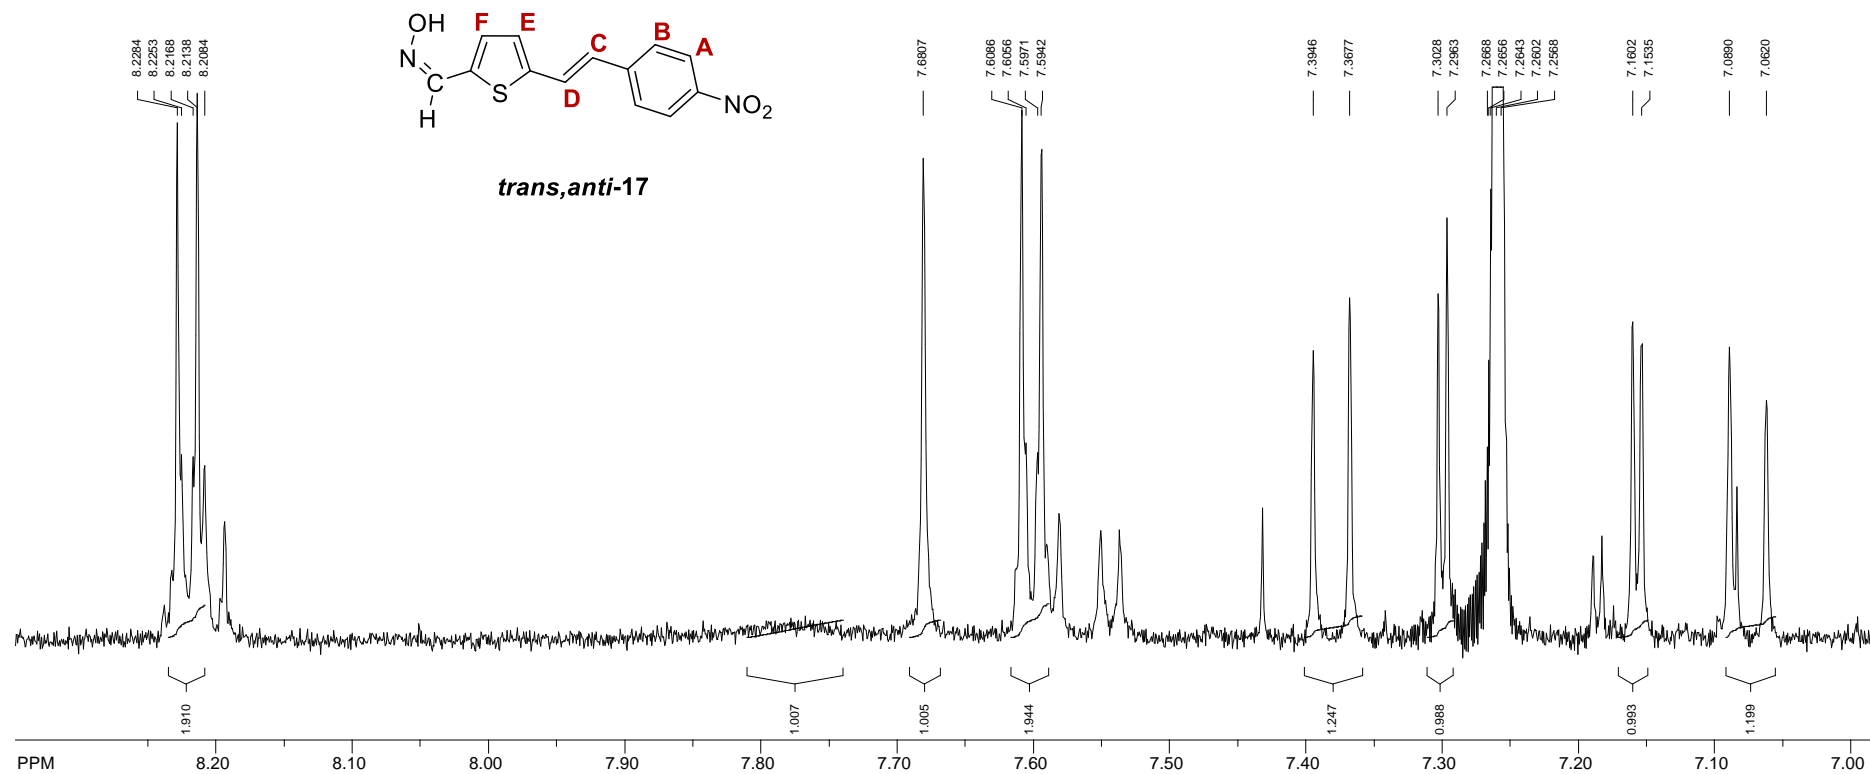

file: D:\PODACI\00 IVANA PUCEK\IvanaPucek diplomski rad\NMR\IP-67\_F21-F24\fid exp: <zg30>  
 transmitter freq.: 600.135401 MHz  
 time domain size: 32768 points  
 width: 12019.23 Hz = 20.027532 ppm = 0.366798 Hz/pt  
 number of scans: 45

freq. of 0 ppm: 600.130010 MHz  
 processed size: 32768 complex points  
 LB: 0.000 GB: 0.0000

## Mass spectra and HRMS analysis of the mixture of geometrical isomers of 5-(4-nitrostyryl)thiophene-2-carbaldehyde oxime (17)

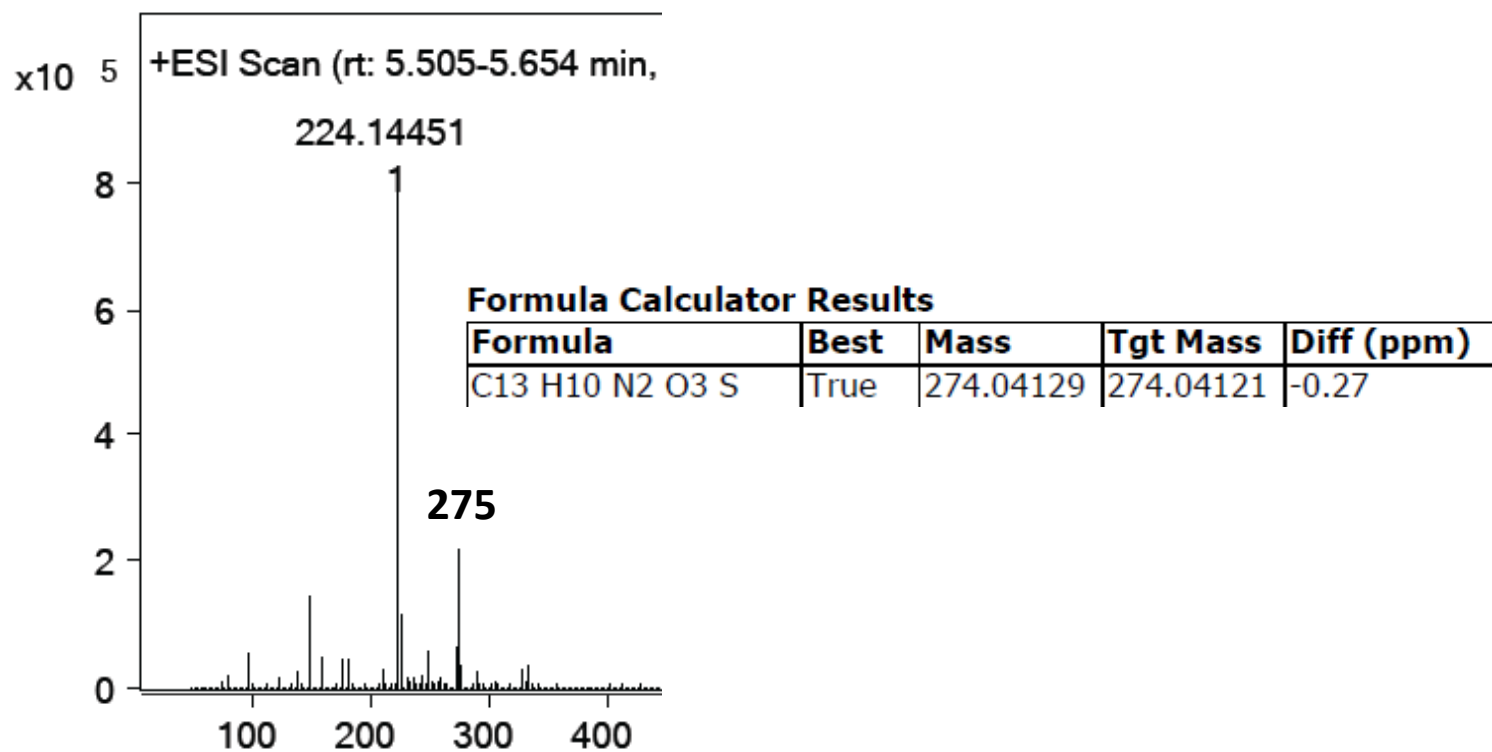

**<sup>1</sup>H NMR spectrum (600 MHz, CDCl<sub>3</sub>) of *cis,syn*-5-(4-dimethylaminostyryl)thiophene-2-carbaldehyde oxime (*cis,syn*-18)**

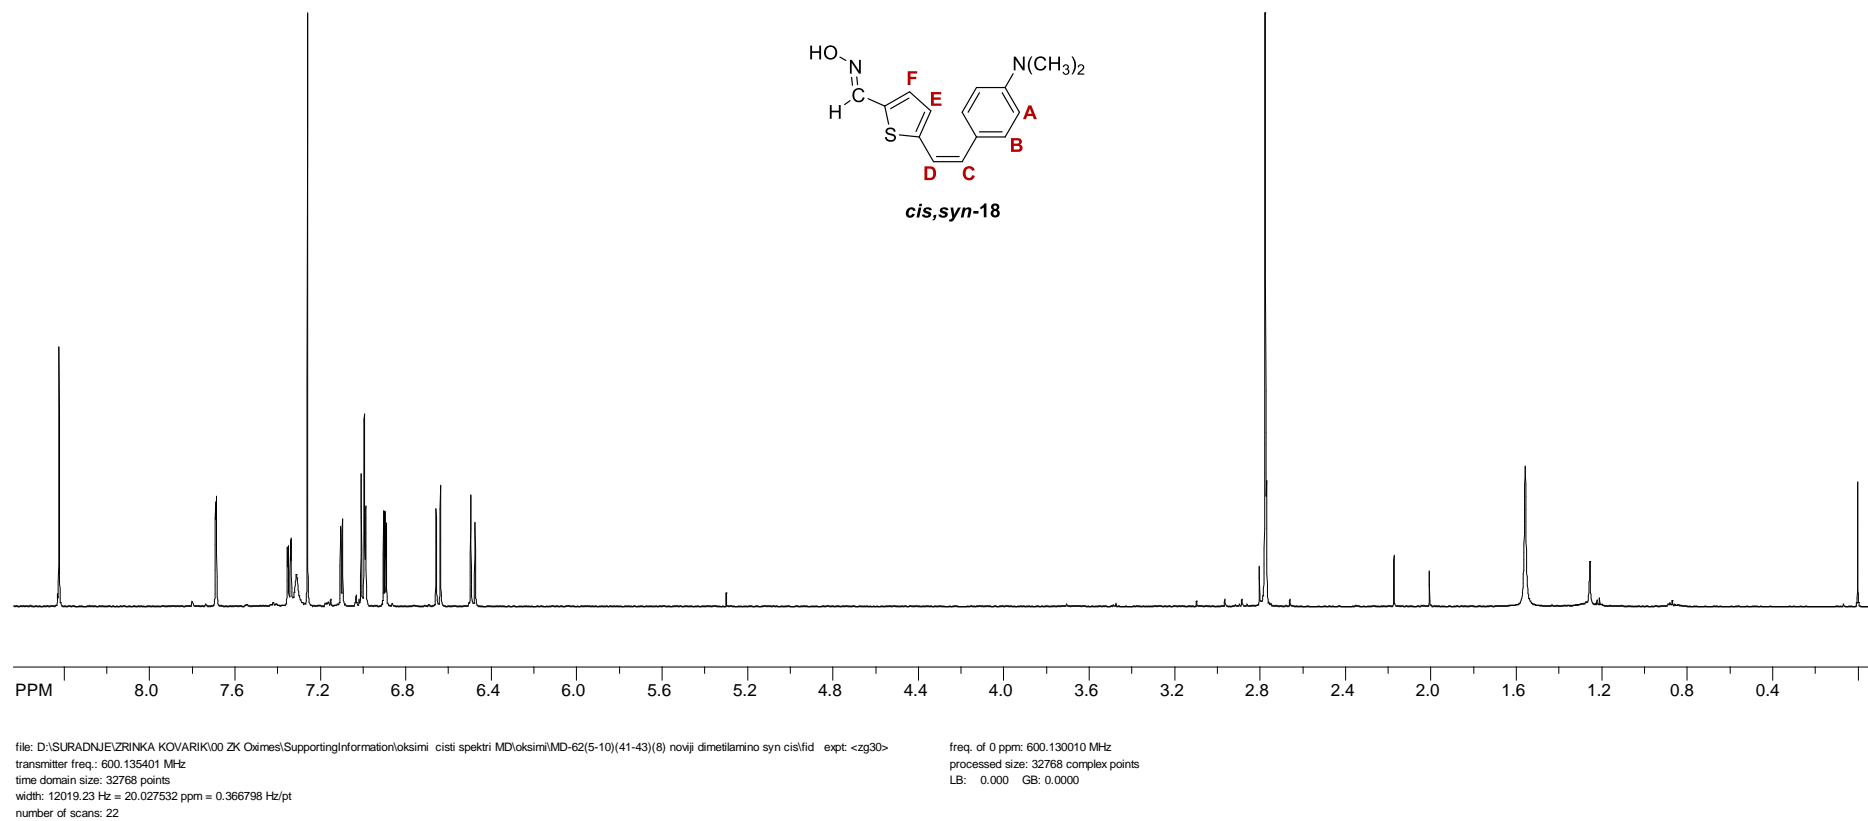

A part of the  $^1\text{H}$  NMR spectrum (600 MHz,  $\text{CDCl}_3$ ) of *cis,syn*-5-(4-dimethylaminostyryl)thiophene-2-carbaldehyde oxime (*cis,syn*-18)

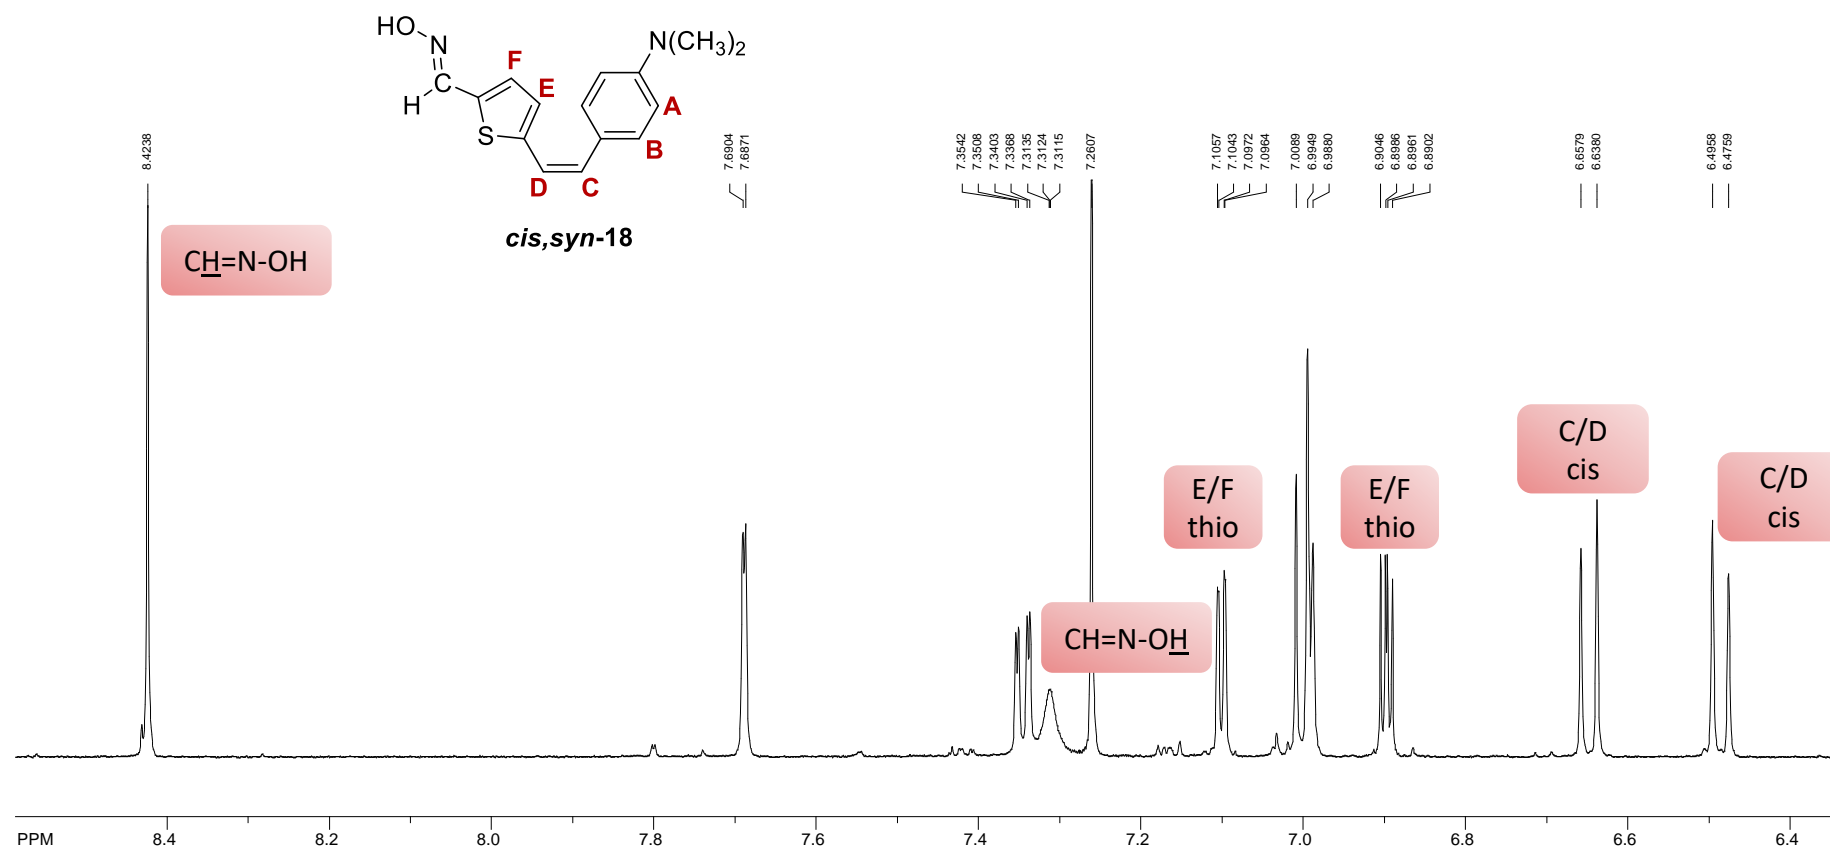

file: D:\SURADNJE\ZINKA KOVARIK\00 ZK Oximes\SupportingInformation\oksimi cisti spektri MD\oksimi\MD-62(5-10)(41-43)(8) noviji dimetilamino syn cis\fid exp: <zg30>  
transmitter freq.: 600.135401 MHz  
time domain size: 32768 points  
width: 12019.23 Hz = 20.027532 ppm = 0.366798 Hz/pt  
number of scans: 22

freq. of 0 ppm: 600.130010 MHz  
processed size: 32768 complex points  
LB: 0.000 GB: 0.0000

**$^{13}\text{C}$ NMR spectrum (600 MHz,  $\text{CDCl}_3$ ) of *cis,syn*-5-(4-dimethylaminostyryl)thiophene-2-carbaldehyde oxime (*cis,syn*-18)**

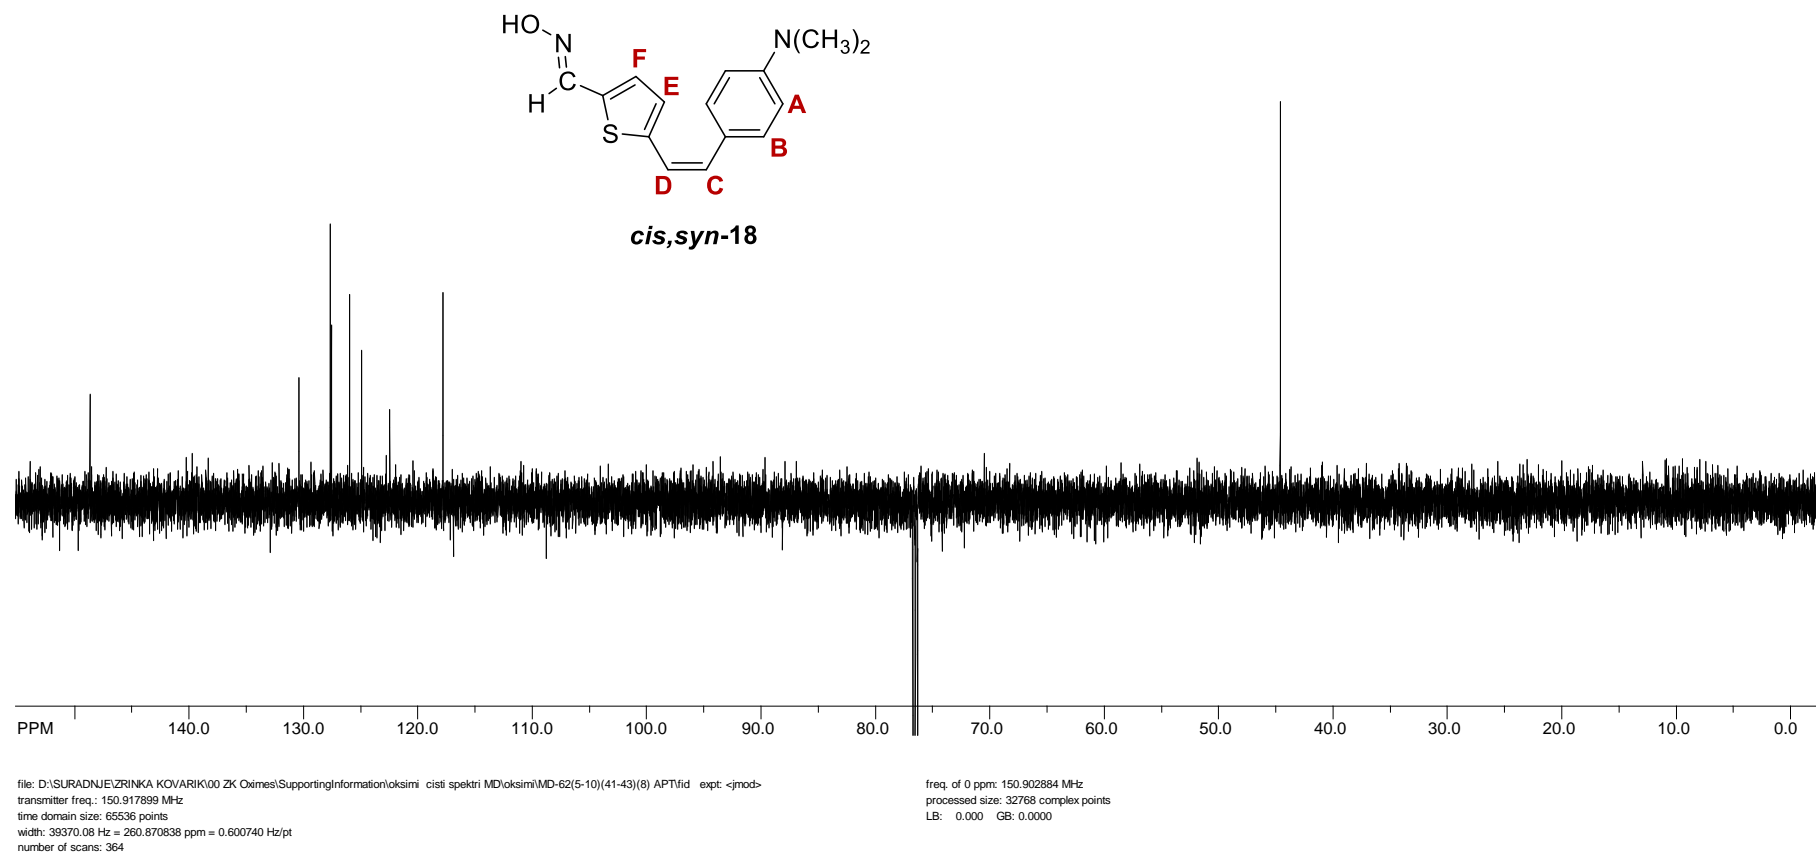



## COSY spectrum of *cis,syn*-5-(4-dimethylaminostyryl)thiophene-2-carbaldehyde oxime (*cis,syn*-18)

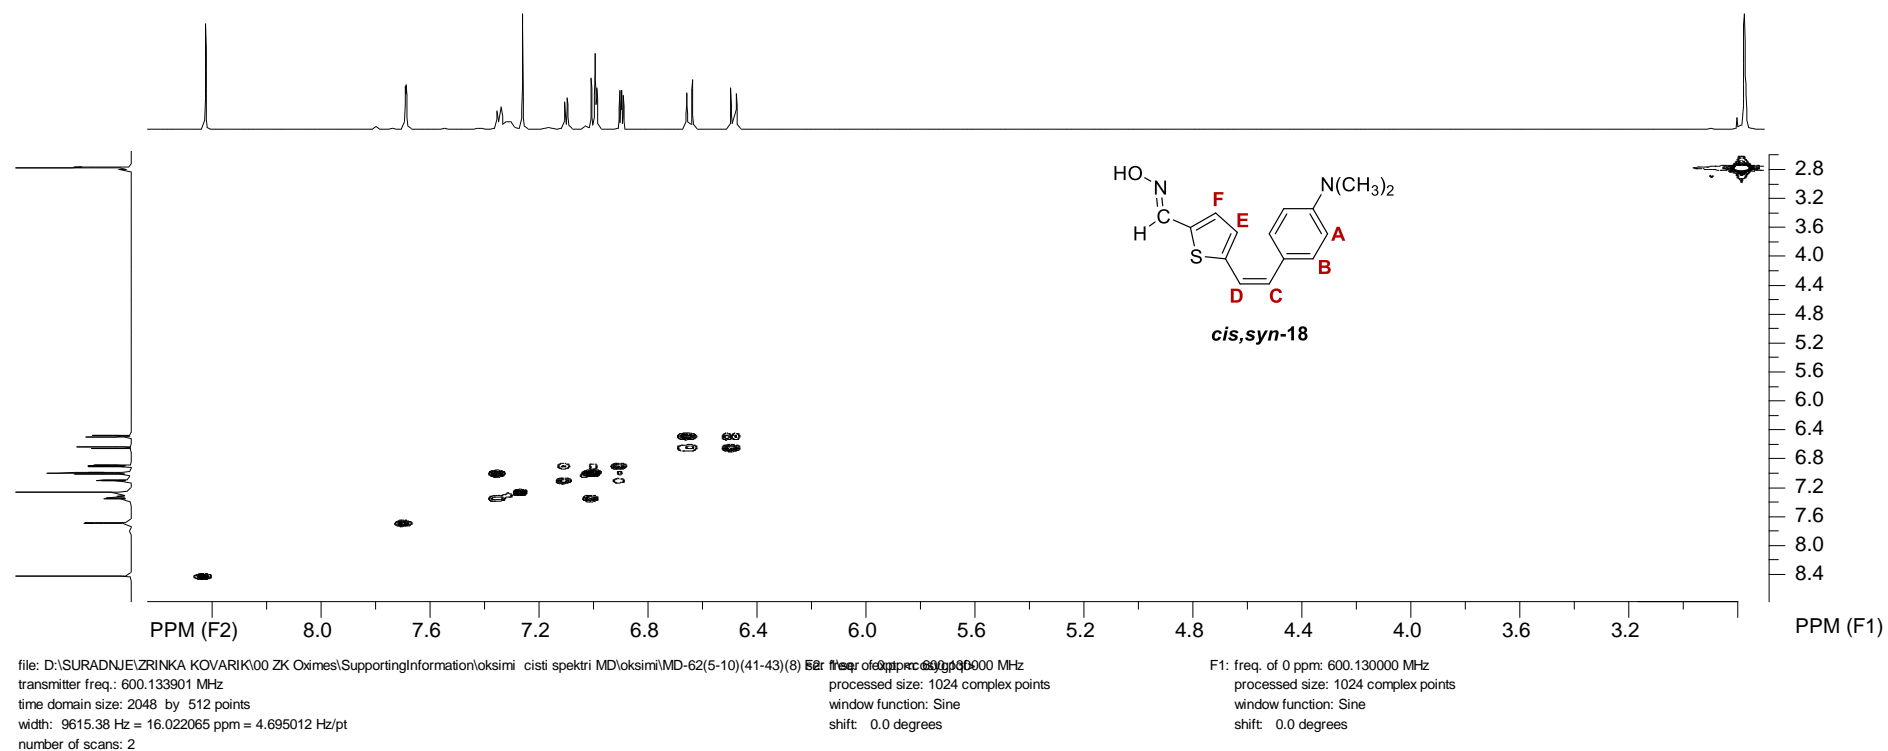

HSQC spectrum of *cis,syn*-5-(4-dimethylaminostyryl)thiophene-2-carbaldehyde oxime (*cis,syn*-18)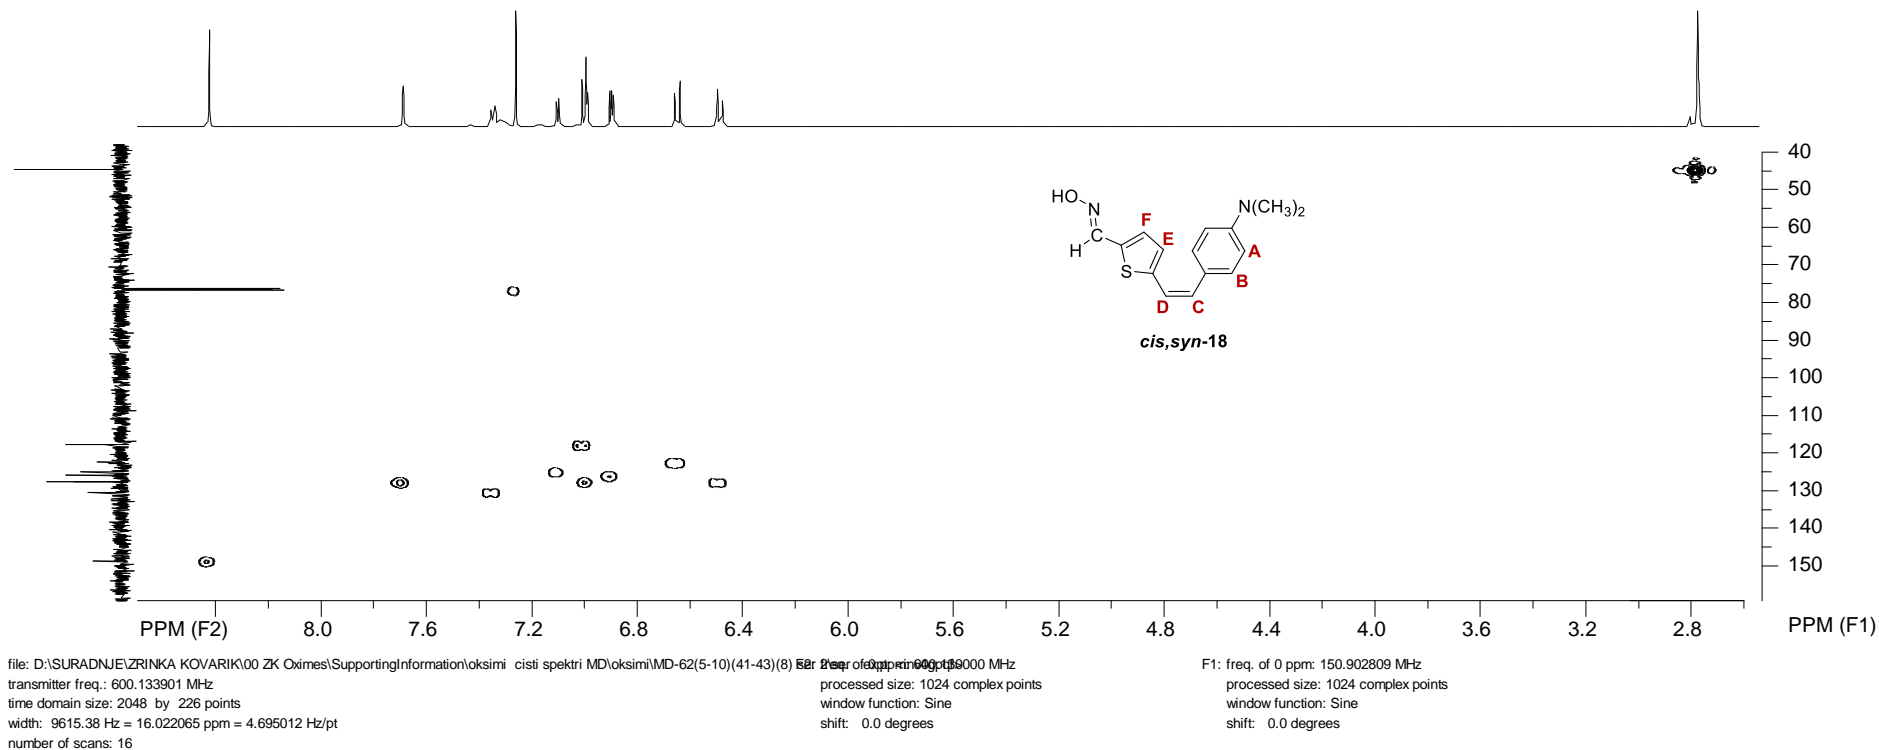

$^1\text{H}$  NMR spectrum (600 MHz,  $\text{CDCl}_3$ ) of *trans,syn*-5-(4-dimethylaminostyryl)thiophene-2-carbaldehyde oxime (*trans,syn*-18) with traces of *cis,syn*-18

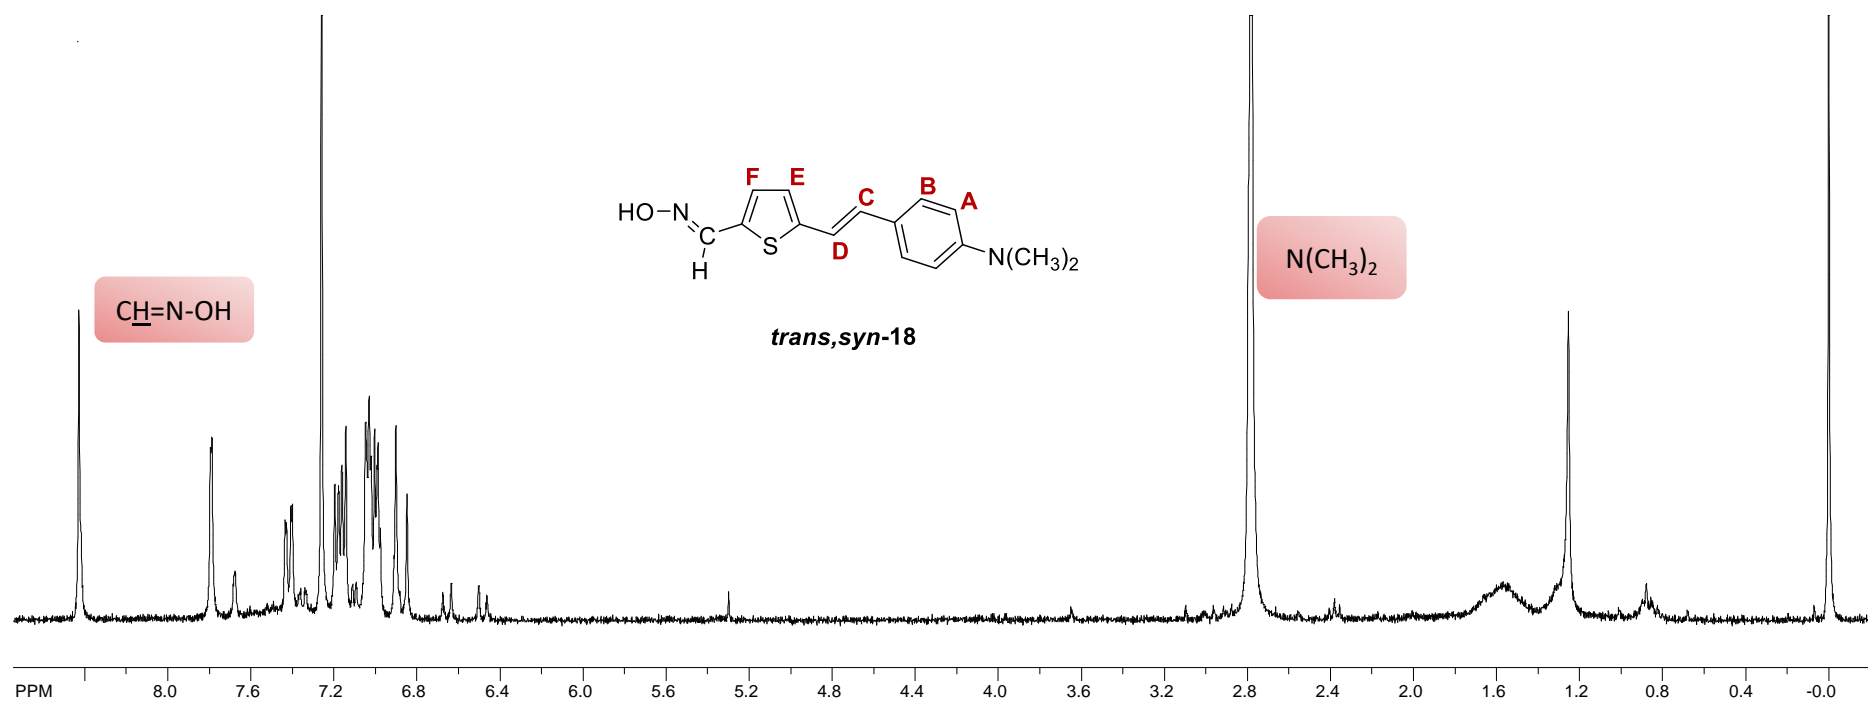

A part of the  $^1\text{H}$  NMR spectrum (600 MHz,  $\text{CDCl}_3$ ) of *trans,syn*-5-(4-dimethylaminostyryl)thiophene-2-carbaldehyde oxime (*trans,syn*-18) with traces of *cis,syn*-18

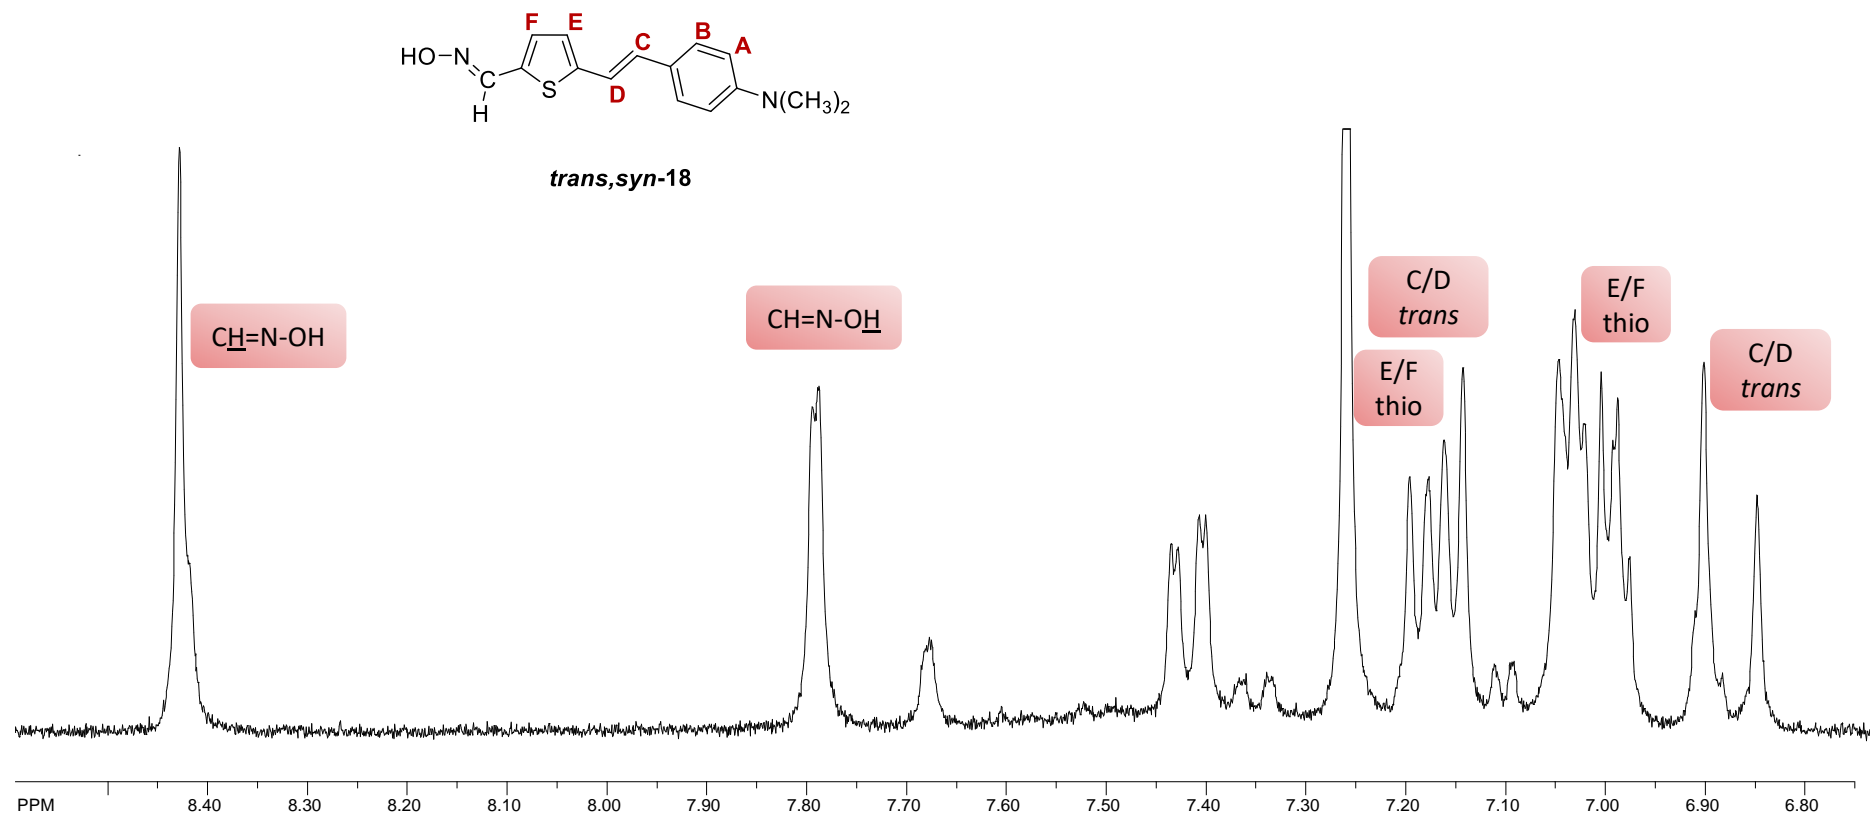

**Mass spectra and HRMS analysis of the mixture of geometrical isomers of 5-(4-dimethylaminostyryl)thiophene-2-carbaldehyde oxime (18)**

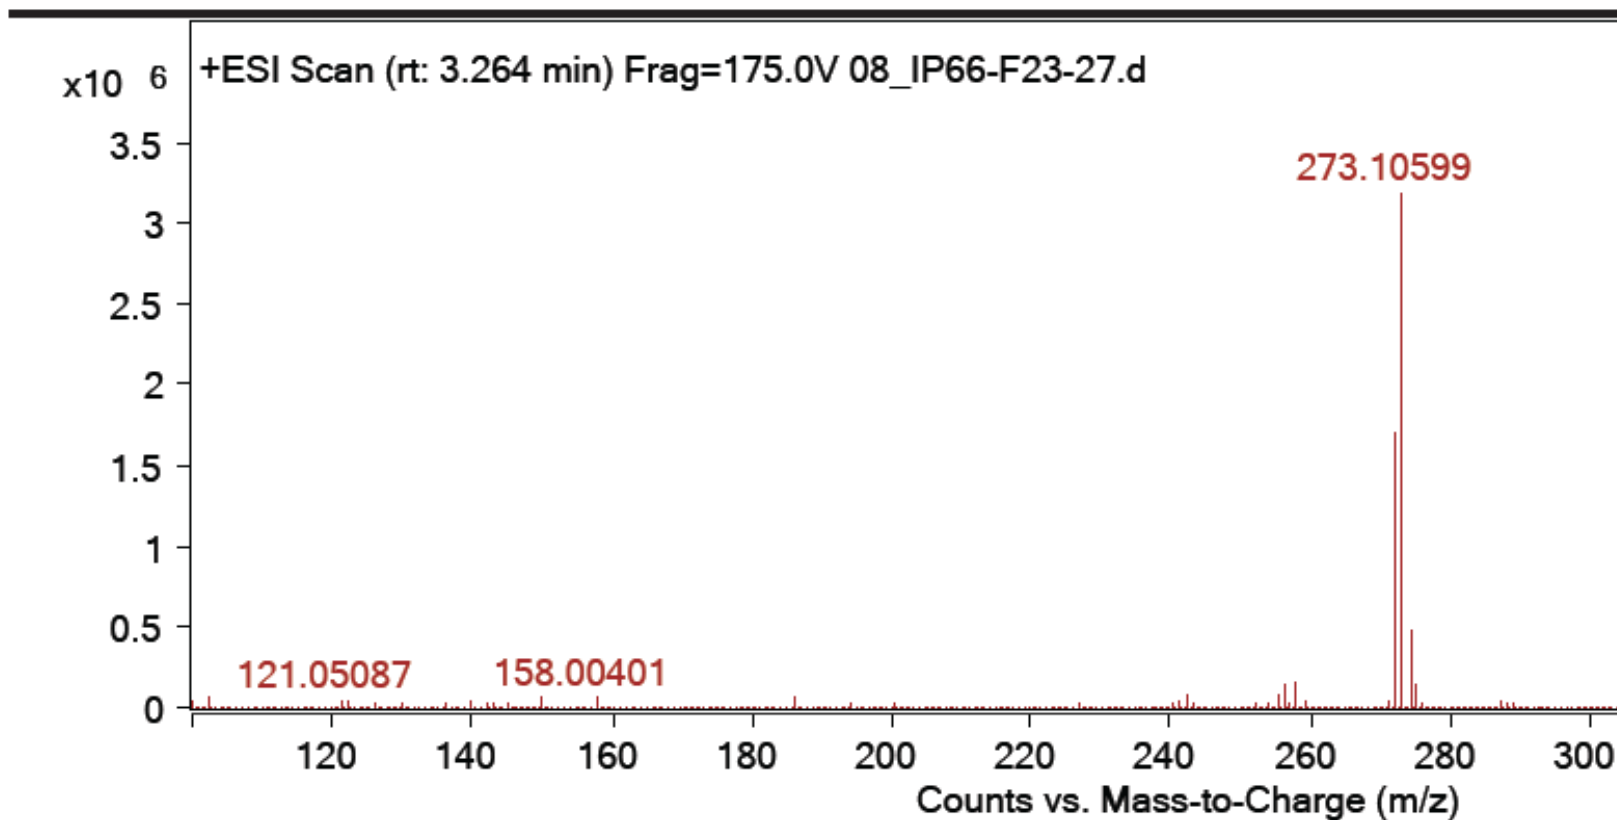

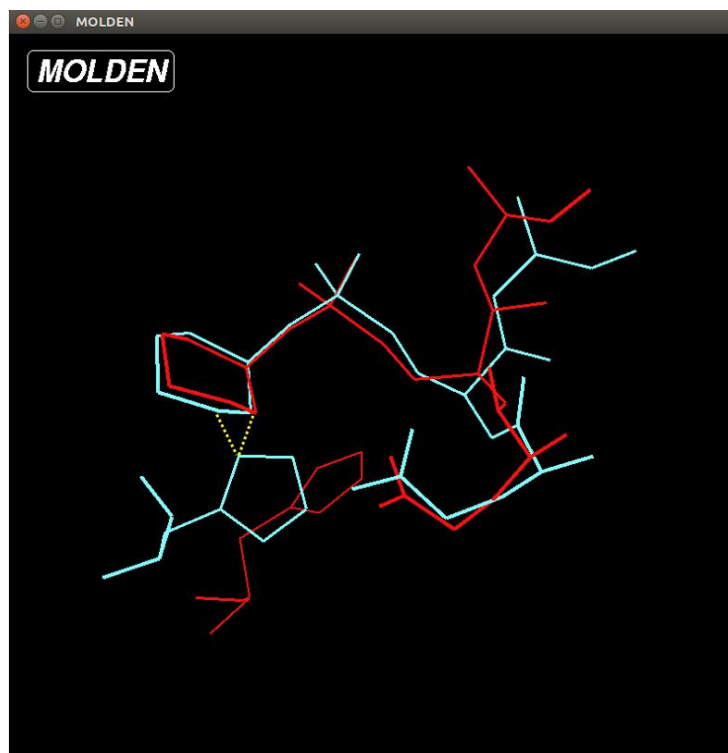

**Figure S1.** Superposition of the cyclosarin-bound AChE (3ZLU) and BChE (3DJY) with cyclosarin in the same conformation at the active serine.

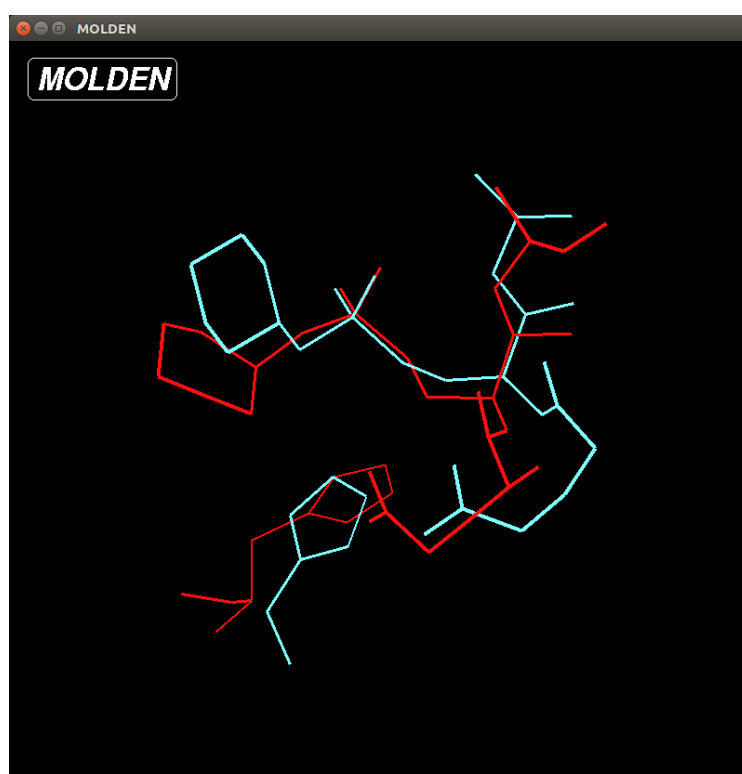

**Figure S2.** Superposition of cyclosarin-bound AChE (3ZLU) and BChE (3DJY) with cyclosarin bound at the active serine obtained by replacing the dimethylamino and ethoxy groups of tabun with methyl and cyclohexyloxy groups of cyclosarin, respectively.

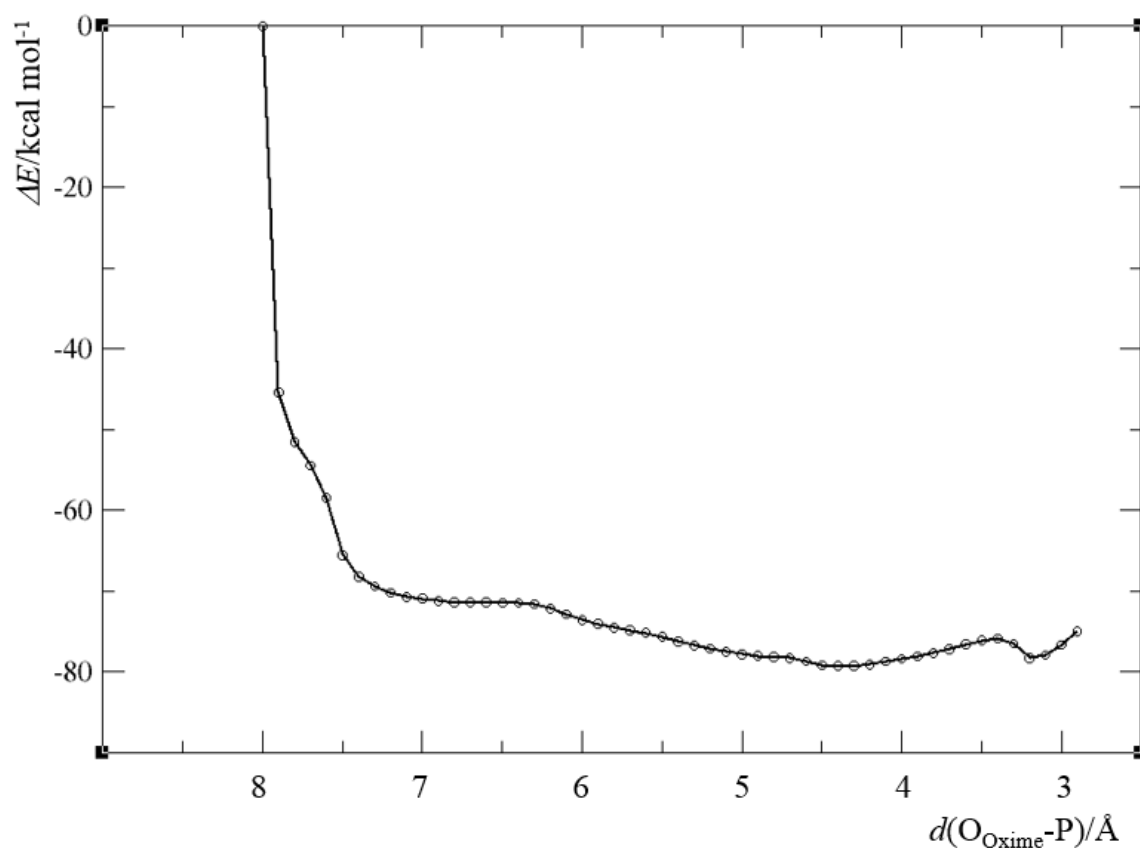

**Figure S3.** Energy profile for the incremental decrease of the distance between the oxygen of oxime and phosphorus.

**Table S1:** Data obtained by scanning of PES, presented in Figure S3.

| $d(\text{O}_{\text{Oxime}}-\text{P})/\text{\AA}$ | $E/\text{a.u.}$ | $\Delta E/\text{kcal mol}^{-1}$ |
|--------------------------------------------------|-----------------|---------------------------------|
| 8.0                                              | -3023.14875211  | 0.0                             |
| 7.9                                              | -3023.22104022  | -45.4                           |
| 7.8                                              | -3023.23083027  | -51.5                           |
| 7.7                                              | -3023.23559504  | -54.5                           |
| 7.6                                              | -3023.24197973  | -58.5                           |
| 7.5                                              | -3023.25321603  | -65.6                           |
| 7.4                                              | -3023.25750187  | -68.2                           |
| 7.3                                              | -3023.25934329  | -69.4                           |
| 7.2                                              | -3023.26064081  | -70.2                           |
| 7.1                                              | -3023.26148648  | -70.7                           |
| 7.0                                              | -3023.261806    | -70.9                           |
| 6.9                                              | -3023.26221457  | -71.2                           |
| 6.8                                              | -3023.26255554  | -71.4                           |
| 6.7                                              | -3023.26257896  | -71.4                           |
| 6.6                                              | -3023.26257942  | -71.4                           |
| 6.5                                              | -3023.26259845  | -71.4                           |

|     |                |       |
|-----|----------------|-------|
| 6.4 | -3023.26267886 | -71.5 |
| 6.3 | -3023.26292451 | -71.6 |
| 6.2 | -3023.26373582 | -72.2 |
| 6.1 | -3023.26489563 | -72.9 |
| 6.0 | -3023.26602838 | -73.6 |
| 5.9 | -3023.26684957 | -74.1 |
| 5.8 | -3023.26748589 | -74.5 |
| 5.7 | -3023.26807808 | -74.9 |
| 5.6 | -3023.26861376 | -75.2 |
| 5.5 | -3023.26932586 | -75.7 |
| 5.4 | -3023.27027757 | -76.3 |
| 5.3 | -3023.27099308 | -76.7 |
| 5.2 | -3023.27165175 | -77.1 |
| 5.1 | -3023.2722913  | -77.5 |
| 5.0 | -3023.27277758 | -77.8 |
| 4.9 | -3023.27313198 | -78.0 |
| 4.8 | -3023.27338063 | -78.2 |
| 4.7 | -3023.27355393 | -78.3 |
| 4.6 | -3023.27425762 | -78.8 |
| 4.5 | -3023.27491851 | -79.2 |
| 4.4 | -3023.27507675 | -79.3 |
| 4.3 | -3023.27511891 | -79.3 |
| 4.2 | -3023.27477219 | -79.1 |
| 4.1 | -3023.27423352 | -78.7 |
| 4.0 | -3023.27370378 | -78.4 |
| 3.9 | -3023.27320123 | -78.1 |
| 3.8 | -3023.27255992 | -77.7 |
| 3.7 | -3023.27176426 | -77.2 |
| 3.6 | -3023.27086624 | -76.6 |
| 3.5 | -3023.2701283  | -76.2 |
| 3.4 | -3023.26971677 | -75.9 |
| 3.3 | -3023.27073463 | -76.5 |
| 3.2 | -3023.27355892 | -78.3 |
| 3.1 | -3023.27296703 | -77.9 |
| 3.0 | -3023.27091124 | -76.7 |
| 2.9 | -3023.2682795  | -75.0 |
| 2.8 | -3023.26520104 | -73.1 |
| 2.7 | -3023.26183603 | -71.0 |
| 2.6 | -3023.25784468 | -68.5 |
